# Supplementary material for: N6-Methyladenosine-related alternative splicing events play a role in bladder cancer
Source: publisher site journal article supplement (doi:10.1515/biol-2022-0479), 2022-01-01
Supplement: Supplementary file 2 [file biol-2022-0479_suppl_table1.xlsx]

## Sheet: Supplementary table 2
symbol	logFC	AveExpr	t	P.Value	adj.P.Val	B
63511	-0.579279	0.153931	-17.1869	1.97e-50	2.21e-46	103.93
11116	-0.564086	0.231096	-10.2155	5.18e-22	1.06e-19	39.1709
81862	-0.540545	0.325841	-8.81178	3.36e-17	4.03e-15	28.248
31677	-0.530678	0.356585	-10.7138	8.03e-24	1.96e-21	43.2842
55614	-0.446949	0.386856	-7.8088	4.72e-14	3.77e-12	21.1253
9450	-0.412627	0.247366	-7.49668	3.97e-13	2.81e-11	19.038
12254	-0.409762	0.213837	-9.09478	3.91e-18	5.19e-16	30.3654
47191	-0.401588	0.138429	-10.9363	1.21e-24	3.26e-22	45.1566
79055	-0.396137	0.33959	-6.69889	6.82e-11	3.58e-09	14.0039
24853	-0.384664	0.160521	-10.6677	1.19e-23	2.86e-21	42.8991
168	-0.376384	0.254261	-7.71985	8.72e-14	6.65e-12	20.5239
42494	-0.371235	0.241918	-9.33264	6.21e-19	9.16e-17	32.1795
16164	-0.36963	0.371555	-7.22848	2.35e-12	1.52e-10	17.2964
34188	-0.363248	0.305363	-7.0085	9.75e-12	5.85e-10	15.9048
50577	-0.358874	0.498159	-6.40832	3.98e-10	1.83e-08	12.283
72749	-0.353996	0.48941	-4.95565	1.05e-06	2.47e-05	4.6534
12296	-0.344816	0.541442	-6.88568	2.13e-11	1.22e-09	15.1425
82815	-0.341988	0.457999	-4.45506	1.08e-05	0.000198022	2.42351
9492	-0.337102	0.469779	-5.41505	1.04e-07	3.03e-06	6.88441
29448	-0.336192	0.202063	-9.45909	2.3e-19	3.59e-17	33.1563
59817	-0.335918	0.355456	-6.406	4.04e-10	1.86e-08	12.2695
3295	-0.333202	0.124796	-14.2164	1.13e-37	1.49e-34	74.8366
60494	-0.329874	0.408889	-6.66267	8.53e-11	4.34e-09	13.786
26202	-0.329124	0.360652	-5.95762	5.45e-09	2.05e-07	9.73849
10674	-0.328672	0.387057	-5.48479	7.19e-08	2.18e-06	7.23815
27903	-0.32399	0.395926	-5.71002	2.15e-08	7.17e-07	8.40715
67616	-0.322019	0.35744	-6.07447	2.81e-09	1.1e-07	10.3833
11009	-0.321179	0.343815	-5.90331	7.39e-09	2.7e-07	9.44239
61690	-0.318533	0.176256	-11.0779	3.57e-25	1.07e-22	46.3593
17387	-0.315587	0.286636	-4.55673	6.83e-06	0.0001333	2.85906
52611	-0.314087	0.353153	-6.41233	3.89e-10	1.8e-08	12.3063
2189	-0.31393	0.0343766	-14.401	1.9e-38	2.84e-35	76.5995
58133	-0.30979	0.109644	-9.81486	1.36e-20	2.34e-18	35.9496
55998	-0.309226	0.556319	-8.81109	3.38e-17	4.03e-15	28.2429
89321	-0.308046	0.135335	-11.315	4.57e-26	1.58e-23	48.3913
60253	-0.307003	0.500478	-8.84949	2.53e-17	3.1e-15	28.5275
21884	-0.306637	0.661886	-6.22149	1.2e-09	5.14e-08	11.2095
87402	-0.306178	0.343455	-9.83159	1.18e-20	2.09e-18	36.0825
50921	-0.305401	0.427855	-5.22677	2.73e-07	7.36e-06	5.94908
22209	-0.30422	0.689472	-3.47899	0.000556329	0.00571568	-1.29531
73784	-0.30026	0.554399	-4.92213	1.24e-06	2.88e-05	4.49749
20733	-0.299041	0.308905	-7.35193	1.04e-12	7.04e-11	18.0921
87693	-0.297462	0.480206	-6.14763	1.84e-09	7.58e-08	10.7924
16862	-0.295375	0.452014	-6.22693	1.16e-09	5e-08	11.2404
78210	-0.294639	0.517312	-5.26216	2.28e-07	6.27e-06	6.1227
12409	-0.29286	0.180094	-8.40938	6.62e-16	6.63e-14	25.3169
85690	-0.289852	0.576144	-7.78103	5.72e-14	4.47e-12	20.937
15999	-0.289547	0.202435	-6.22051	1.21e-09	5.16e-08	11.204
56813	-0.287946	0.249474	-7.91986	2.18e-14	1.82e-12	21.8833
55054	-0.287337	0.579724	-7.97563	1.48e-14	1.27e-12	22.2669
20516	-0.287326	0.122318	-11.9197	2.18e-28	9.97e-26	53.6754
61613	-0.286225	0.261975	-7.05604	7.19e-12	4.39e-10	16.2027
167	-0.286026	0.103612	-7.91418	2.27e-14	1.89e-12	21.8443
44841	-0.284047	0.530032	-4.18253	3.52e-05	0.000554269	1.30014
44054	-0.283365	0.241225	-8.13259	4.86e-15	4.43e-13	23.3571
26983	-0.281435	0.3999	-5.17814	3.49e-07	9.2e-06	5.71221
13355	-0.28078	0.133693	-7.42054	6.61e-13	4.6e-11	18.5387
72863	-0.279645	0.122108	-8.86844	2.19e-17	2.7e-15	28.6683
18278	-0.278313	0.532454	-4.54527	7.2e-06	0.000139186	2.80954
2783	-0.274223	0.2831	-6.10184	2.4e-09	9.64e-08	10.5359
85823	-0.27247	0.624915	-4.13059	4.37e-05	0.000663273	1.09344
76410	-0.272371	0.504688	-4.20066	3.26e-05	0.000520309	1.37284
576	-0.271717	0.152055	-8.15502	4.15e-15	3.81e-13	23.5142
65434	-0.270615	0.340675	-5.13635	4.31e-07	1.11e-05	5.51021
17897	-0.269796	0.570046	-3.89834	0.000112843	0.00149048	0.198315
30979	-0.269441	0.610222	-4.57967	6.16e-06	0.000121164	2.95858
12510	-0.268738	0.432998	-7.63666	1.54e-13	1.15e-11	19.9663
53180	-0.26771	0.573649	-3.2312	0.00133052	0.0118369	-2.10256
76094	-0.267704	0.163954	-6.68401	7.48e-11	3.88e-09	13.9142
73145	-0.267564	0.236177	-6.13205	2.02e-09	8.22e-08	10.705
3739	-0.267253	0.237232	-6.123	2.12e-09	8.58e-08	10.6542
64992	-0.267241	0.117327	-8.31525	1.31e-15	1.28e-13	24.6451
72196	-0.267225	0.61719	-4.96852	9.87e-07	2.35e-05	4.71354
76924	-0.265943	0.436472	-6.05714	3.1e-09	1.21e-07	10.287
253	-0.265818	0.460212	-4.412	1.31e-05	0.00023279	2.24171
47194	-0.265073	0.318218	-5.02526	7.48e-07	1.82e-05	4.98027
89238	-0.264069	0.335682	-6.34329	5.86e-10	2.66e-08	11.9063
69017	-0.263332	0.0805222	-11.783	7.38e-28	3.07e-25	52.4685
81388	-0.26317	0.62575	-3.64053	0.000306294	0.00348885	-0.738778
56151	-0.262692	0.705243	-3.10023	0.00206494	0.0168043	-2.50634
24278	-0.262157	0.598243	-6.17329	1.59e-09	6.6e-08	10.9368
66827	-0.258495	0.510733	-3.758	0.000195699	0.00239975	-0.319227
43489	-0.258094	0.0745849	-9.35387	5.26e-19	7.86e-17	32.3429
40038	-0.256706	0.324689	-5.77271	1.53e-08	5.24e-07	8.73969
83801	-0.256363	0.628695	-3.40506	0.000725635	0.00714109	-1.54207
16453	-0.256323	0.322507	-4.79858	2.23e-06	4.96e-05	3.93083
47088	-0.256062	0.524804	-3.44538	0.000628116	0.0063371	-1.40811
52207	-0.255439	0.382235	-4.85076	1.74e-06	3.94e-05	4.16857
30484	-0.253988	0.570857	-8.45556	4.73e-16	4.84e-14	25.6484
50520	-0.253785	0.656388	-7.27039	1.79e-12	1.17e-10	17.5654
75458	-0.253727	0.629006	-3.36152	0.000846689	0.00811519	-1.68506
75037	-0.252473	0.33595	-5.60028	3.89e-08	1.24e-06	7.83252
31442	-0.250982	0.465174	-6.57716	1.44e-10	7.13e-09	13.2754
42067	-0.249928	0.427859	-4.2011	3.25e-05	0.000519698	1.37463
29170	-0.249734	0.643171	-3.49487	0.000525157	0.00546554	-1.24167
63794	-0.24912	0.254667	-8.74568	5.52e-17	6.52e-15	27.76
26100	-0.248879	0.185186	-8.61008	1.52e-16	1.67e-14	26.7668
12935	-0.248635	0.369772	-7.3533	1.03e-12	7e-11	18.1009
68071	-0.247944	0.293805	-3.86198	0.000130354	0.00168895	0.0625262
88694	-0.246879	0.519643	-4.17705	3.6e-05	0.00056446	1.27822
10715	-0.245927	0.565078	-6.74058	5.27e-11	2.83e-09	14.2558
64358	-0.245366	0.320976	-8.15335	4.19e-15	3.84e-13	23.5025
13079	-0.245047	0.496202	-4.63386	4.81e-06	9.82e-05	3.19545
44551	-0.24373	0.570228	-4.07608	5.49e-05	0.000804181	0.879037
59695	-0.242363	0.490038	-3.7376	0.000211707	0.00255552	-0.392971
575	-0.241759	0.304751	-4.87727	1.53e-06	3.51e-05	4.29022
50152	-0.241265	0.669533	-4.56933	6.45e-06	0.000126437	2.9137
86268	-0.240968	0.474043	-5.90046	7.51e-09	2.74e-07	9.4269
3330	-0.240717	0.571999	-4.25198	2.62e-05	0.000429792	1.58025
62680	-0.240606	0.483189	-4.88262	1.49e-06	3.43e-05	4.31487
80091	-0.23988	0.322623	-8.01152	1.15e-14	1.01e-12	22.5148
10507	-0.239183	0.713515	-6.35761	5.39e-10	2.45e-08	11.989
27908	-0.238836	0.616699	-3.62759	0.00032156	0.00363689	-0.784243
58038	-0.236453	0.474195	-4.3312	1.86e-05	0.00031919	1.90493
70617	-0.236242	0.447033	-6.18865	1.45e-09	6.12e-08	11.0235
61187	-0.236212	0.403004	-3.61967	0.000331257	0.00372777	-0.812005
81608	-0.235809	0.613452	-3.55094	0.000427658	0.00461351	-1.05039
72906	-0.234695	0.576994	-5.52416	5.84e-08	1.79e-06	7.43957
60875	-0.234313	0.745869	-3.21691	0.00139688	0.0123198	-2.14738
1731	-0.234298	0.558141	-5.68138	2.51e-08	8.29e-07	8.25627
39068	-0.233989	0.665431	-3.25182	0.00123992	0.0111102	-2.03756
47222	-0.233273	0.485046	-4.77217	2.53e-06	5.53e-05	3.81139
32613	-0.233039	0.268196	-5.03434	7.15e-07	1.75e-05	5.02317
76156	-0.232024	0.376512	-6.14208	1.9e-09	7.8e-08	10.7612
61047	-0.231075	0.21755	-4.5438	7.25e-06	0.000139702	2.80321
67936	-0.230966	0.472037	-3.65318	0.000292036	0.00335542	-0.694204
12060	-0.230237	0.262123	-5.36784	1.33e-07	3.79e-06	6.64717
45097	-0.229599	0.657811	-4.07706	5.46e-05	0.000801972	0.882875
13650	-0.229084	0.351239	-3.88161	0.000120604	0.00158368	0.135684
20023	-0.228775	0.384282	-4.49805	8.9e-06	0.000166843	2.6066
61939	-0.228506	0.692865	-2.8774	0.00421583	0.02952	-3.15658
2041	-0.228472	0.612971	-2.87148	0.00429401	0.0299646	-3.17322
58506	-0.226939	0.0738136	-11.6519	2.36e-27	8.83e-25	51.3183
29447	-0.226637	0.635338	-4.01	7.2e-05	0.00102209	0.622686
88571	-0.22639	0.622722	-5.51049	6.28e-08	1.92e-06	7.36946
17155	-0.225734	0.313238	-6.44363	3.23e-10	1.51e-08	12.4888
58381	-0.224327	0.482575	-5.38543	1.21e-07	3.49e-06	6.73532
52883	-0.223894	0.716083	-3.83502	0.000144964	0.00184731	-0.0373895
54114	-0.222736	0.725167	-3.64701	0.000298909	0.00342037	-0.715957
22334	-0.221952	0.624489	-4.55799	6.8e-06	0.000132652	2.86454
88829	-0.221899	0.555797	-3.36615	0.000832976	0.00802835	-1.66994
65190	-0.221602	0.409876	-4.38391	1.48e-05	0.000260523	2.124
38967	-0.22124	0.541232	-9.36178	4.94e-19	7.44e-17	32.4038
29200	-0.220576	0.240635	-4.91669	1.27e-06	2.95e-05	4.47223
50439	-0.220456	0.356176	-5.69163	2.38e-08	7.86e-07	8.31017
87187	-0.219721	0.705561	-5.10624	5.01e-07	1.26e-05	5.36557
43161	-0.219486	0.635807	-3.20309	0.00146398	0.012835	-2.19057
3129	-0.21947	0.622085	-4.00419	7.37e-05	0.00104057	0.600333
25885	-0.219106	0.645111	-2.81436	0.00511906	0.0345502	-3.33208
12153	-0.218863	0.483285	-7.95617	1.69e-14	1.45e-12	22.1329
58751	-0.21822	0.487725	-6.22397	1.18e-09	5.07e-08	11.2236
1111	-0.217563	0.516316	-5.28995	1.98e-07	5.48e-06	6.25974
39457	-0.216032	0.513493	-5.21862	2.85e-07	7.63e-06	5.90926
51656	-0.21592	0.607695	-3.08709	0.00215624	0.0173583	-2.54595
58250	-0.215129	0.454644	-5.70734	2.18e-08	7.26e-07	8.393
73005	-0.214334	0.535461	-2.96522	0.00319847	0.0237063	-2.90585
77596	-0.213829	0.590459	-3.38833	0.000770093	0.00749637	-1.59721
12067	-0.21198	0.182397	-7.53219	3.13e-13	2.26e-11	19.2723
74782	-0.210344	0.0644069	-12.3235	5.7e-30	3.37e-27	57.2782
81861	-0.20911	0.772711	-3.23933	0.0012941	0.0115634	-2.07698
78946	-0.207572	0.6405	-2.89546	0.00398518	0.0283026	-3.10559
33330	-0.207217	0.54785	-8.44377	5.15e-16	5.25e-14	25.5636
61603	-0.207189	0.127307	-6.67975	7.68e-11	3.97e-09	13.8886
52847	-0.205931	0.485735	-3.4473	0.000623795	0.00629634	-1.40169
62501	-0.205802	0.358227	-6.2326	1.12e-09	4.86e-08	11.2726
906	-0.204898	0.0259103	-15.2909	3.23e-42	8.05e-39	85.1936
12552	-0.204065	0.456163	-3.13549	0.00183717	0.0153118	-2.3992
51650	-0.203545	0.69548	-4.07765	5.45e-05	0.000800553	0.885169
43973	-0.203105	0.47598	-6.01023	4.05e-09	1.55e-07	10.0275
27846	-0.20228	0.699541	-3.44471	0.000629635	0.00634957	-1.41035
74775	-0.202262	0.0457897	-12.6844	2.1e-31	1.62e-28	60.5446
19212	-0.201555	0.49607	-5.86331	9.24e-09	3.31e-07	9.22575
55146	-0.201392	0.23502	-5.13321	4.38e-07	1.13e-05	5.49509
30516	-0.200826	0.583113	-5.18582	3.36e-07	8.86e-06	5.74949
86271	-0.200365	0.477742	-6.5412	1.79e-10	8.73e-09	13.0622
56847	-0.200079	0.526515	-3.40744	0.000719511	0.00709951	-1.53421
55355	-0.200007	0.522932	-3.19167	0.00152165	0.0132317	-2.22611
22274	-0.199885	0.340511	-3.86817	0.000127199	0.00165668	0.0855826
47230	-0.199447	0.624761	-4.10049	4.96e-05	0.000738905	0.974717
83064	-0.199433	0.710927	-3.32453	0.000964022	0.00900464	-1.80515
79158	-0.198324	0.751975	-4.59963	5.62e-06	0.000112097	3.04555
12985	-0.19779	0.376947	-4.0911	5.16e-05	0.000764705	0.937849
79572	-0.196953	0.15352	-12.3445	4.71e-30	2.94e-27	57.4669
81829	-0.195716	0.637465	-2.7007	0.00720133	0.0449642	-3.63904
25222	-0.195685	0.426605	-4.15345	3.97e-05	0.000614352	1.18413
75368	-0.195403	0.602063	-3.49129	0.000532032	0.00551915	-1.25377
49933	-0.194541	0.70375	-3.00729	0.00279549	0.0213007	-2.78318
85282	-0.194336	0.356008	-4.12607	4.46e-05	0.000674093	1.07556
62238	-0.194162	0.447095	-4.42863	1.21e-05	0.00021961	2.31173
38629	-0.194126	0.701261	-2.73816	0.00644319	0.0415133	-3.53923
14002	-0.193252	0.446769	-4.96331	1.01e-06	2.4e-05	4.68918
87324	-0.192246	0.573693	-5.42819	9.68e-08	2.85e-06	6.95074
3412	-0.192099	0.115133	-8.0361	9.64e-15	8.58e-13	22.6851
73499	-0.191624	0.747986	-2.87036	0.0043089	0.0300591	-3.17635
19005	-0.191115	0.60802	-2.9344	0.00352661	0.0256203	-2.99465
54058	-0.19061	0.491965	-3.19379	0.00151081	0.0131539	-2.21953
70529	-0.19015	0.672925	-2.857	0.00449087	0.0310293	-3.21378
37878	-0.189166	0.720885	-5.64824	3.01e-08	9.76e-07	8.0825
19180	-0.188997	0.71102	-3.18345	0.00156446	0.0135005	-2.25162
53366	-0.186586	0.269869	-6.19411	1.41e-09	5.94e-08	11.0544
67613	-0.18641	0.474532	-2.97632	0.00308731	0.0230807	-2.87365
76797	-0.186177	0.496512	-3.04905	0.00244204	0.0191557	-2.65979
69734	-0.185832	0.539788	-4.66008	4.26e-06	8.85e-05	3.31097
56500	-0.184538	0.672987	-4.25157	2.62e-05	0.000429915	1.57859
8433	-0.184519	0.292615	-3.66653	0.000277666	0.00322501	-0.647003
50820	-0.184377	0.605909	-3.1513	0.00174274	0.0146866	-2.35077
57885	-0.184322	0.391309	-4.2706	2.42e-05	0.000400035	1.65609
11498	-0.183383	0.718	-5.49068	6.97e-08	2.12e-06	7.26818
73055	-0.183035	0.538611	-2.74751	0.00626545	0.040596	-3.51409
1193	-0.182082	0.375057	-3.16556	0.00166148	0.014158	-2.30692
40205	-0.181469	0.543311	-5.20207	3.1e-07	8.21e-06	5.82853
33528	-0.180337	0.331029	-6.66286	8.52e-11	4.34e-09	13.7871
14793	-0.180161	0.743207	-3.40574	0.000723882	0.00713322	-1.53982
89818	-0.179134	0.498467	-3.19945	0.00148212	0.0129595	-2.2019
11155	-0.179108	0.673923	-2.91573	0.00374009	0.02692	-3.04802
15763	-0.17734	0.592053	-5.47017	7.77e-08	2.34e-06	7.16365
52514	-0.17699	0.347076	-6.0826	2.68e-09	1.06e-07	10.4286
33743	-0.176893	0.721084	-3.21263	0.00141735	0.0124709	-2.16077
69214	-0.176536	0.549173	-5.70663	2.19e-08	7.28e-07	8.38926
75253	-0.176407	0.490454	-3.12026	0.00193253	0.0159115	-2.44561
51396	-0.176189	0.544641	-3.62892	0.000319962	0.00362064	-0.779585
10361	-0.175883	0.194206	-3.81685	0.000155667	0.00196915	-0.104344
35889	-0.175787	0.645009	-3.76214	0.000192594	0.00236555	-0.304222
90287	-0.175199	0.676933	-3.47242	0.00056974	0.00583743	-1.31746
59788	-0.174873	0.509118	-3.09025	0.00213397	0.0172456	-2.53645
55572	-0.174121	0.640425	-3.52484	0.000470707	0.00497906	-1.13976
68345	-0.173806	0.501273	-3.74852	0.000202993	0.00247431	-0.353554
76647	-0.173188	0.176252	-5.63908	3.16e-08	1.02e-06	8.0346
62666	-0.172607	0.271697	-5.70308	2.23e-08	7.4e-07	8.37051
68744	-0.172347	0.658297	-3.52286	0.000474133	0.00500888	-1.14652
64002	-0.171917	0.554292	-3.0899	0.00213644	0.0172484	-2.53751
11237	-0.171222	0.609103	-5.33075	1.61e-07	4.54e-06	6.46207
11208	-0.17117	0.398237	-5.70974	2.15e-08	7.17e-07	8.40571
55470	-0.170858	0.623845	-4.50647	8.57e-06	0.000161328	2.64266
11315	-0.170495	0.351113	-3.23667	0.00130592	0.0116458	-2.08536
71561	-0.170354	0.558136	-3.61944	0.00033154	0.00372908	-0.812802
30539	-0.170032	0.578766	-3.31121	0.00100986	0.00935915	-1.8481
10670	-0.169882	0.411208	-4.66151	4.23e-06	8.8e-05	3.31729
36540	-0.169284	0.739221	-3.40652	0.000721876	0.00711659	-1.53725
86634	-0.169101	0.623401	-2.98734	0.00298041	0.022401	-2.84156
63960	-0.168934	0.606871	-3.70824	0.000236932	0.00280444	-0.498473
49934	-0.168903	0.709917	-3.73134	0.000216863	0.00260654	-0.41553
19307	-0.16874	0.754814	-3.93901	9.59e-05	0.00130196	0.351616
61097	-0.167633	0.792592	-2.89918	0.00393913	0.0280823	-3.09506
3266	-0.167615	0.306873	-4.27787	2.34e-05	0.000389162	1.68576
29747	-0.166753	0.185274	-5.40032	1.12e-07	3.25e-06	6.81016
16152	-0.16614	0.715207	-3.7026	0.000242086	0.00285313	-0.518631
69825	-0.166017	0.519297	-2.79439	0.0054398	0.0363865	-3.3869
28873	-0.165867	0.568714	-2.68128	0.0076254	0.0469584	-3.69029
37739	-0.164955	0.39848	-5.15687	3.89e-07	1.01e-05	5.60923
28366	-0.164167	0.317458	-4.17268	3.67e-05	0.000573751	1.26075
44667	-0.163675	0.514581	-4.72576	3.14e-06	6.77e-05	3.60288
33527	-0.163045	0.588508	-4.49561	9e-06	0.000168317	2.59616
27495	-0.162443	0.563962	-2.82093	0.00501729	0.0339631	-3.31396
42158	-0.162103	0.28536	-4.36934	1.58e-05	0.000275814	2.06319
47967	-0.16196	0.496817	-3.17685	0.00159964	0.0137189	-2.27206
50448	-0.161707	0.722964	-3.74802	0.000203382	0.0024777	-0.355348
10970	-0.161644	0.654735	-5.85678	9.58e-09	3.42e-07	9.19051
62299	-0.161268	0.230999	-5.21943	2.84e-07	7.61e-06	5.9132
84703	-0.16071	0.585722	-2.66985	0.00788529	0.0481359	-3.72027
40858	-0.160613	0.350062	-5.34465	1.49e-07	4.25e-06	6.53131
60399	-0.160601	0.688309	-3.29021	0.00108622	0.0099381	-1.91544
57999	-0.160559	0.108845	-12.5588	6.65e-31	4.81e-28	59.4036
73246	-0.160483	0.803728	-2.76015	0.00603246	0.0394097	-3.48001
73327	-0.16001	0.593911	-4.93894	1.14e-06	2.68e-05	4.57556
40913	-0.159662	0.305911	-3.23671	0.00130572	0.0116458	-2.08522
28839	-0.159636	0.554136	-4.52481	7.9e-06	0.00015007	2.72135
87879	-0.159361	0.397493	-2.97803	0.00307047	0.0229932	-2.86868
25148	-0.159105	0.391516	-2.97179	0.00313223	0.0233465	-2.8868
69181	-0.159027	0.676375	-3.27973	0.00112632	0.0102438	-1.94891
43608	-0.158959	0.712587	-4.53853	7.42e-06	0.000142509	2.78045
44017	-0.158648	0.222321	-4.75581	2.73e-06	5.94e-05	3.73765
68559	-0.158416	0.695674	-4.13811	4.24e-05	0.000646456	1.12322
45828	-0.158407	0.134841	-10.3425	1.81e-22	3.98e-20	40.2084
43602	-0.158383	0.734901	-2.67636	0.00773628	0.047448	-3.70321
45394	-0.158356	0.636263	-2.72365	0.00672792	0.0428554	-3.57805
17810	-0.157754	0.476311	-3.82191	0.000152611	0.00193267	-0.0857085
80663	-0.15723	0.330844	-5.53083	5.64e-08	1.73e-06	7.47381
43100	-0.157225	0.739016	-4.98181	9.25e-07	2.22e-05	4.77577
82288	-0.15698	0.550139	-4.87363	1.56e-06	3.56e-05	4.27352
88162	-0.156638	0.540977	-3.08781	0.00215113	0.0173296	-2.54378
33266	-0.156452	0.697539	-3.48943	0.000535651	0.00554644	-1.26008
60283	-0.156295	0.584678	-5.81258	1.22e-08	4.24e-07	8.95279
33897	-0.156182	0.581485	-3.17507	0.00160923	0.0137703	-2.27756
80361	-0.156157	0.693462	-4.12433	4.49e-05	0.000678091	1.06869
3533	-0.155463	0.656056	-3.22011	0.00138179	0.0122059	-2.13738
29766	-0.154712	0.489494	-2.71456	0.00691207	0.0437179	-3.60228
78950	-0.154444	0.505192	-4.53707	7.47e-06	0.000143205	2.77416
98313	-0.153938	0.355385	-3.65488	0.000290168	0.00333909	-0.688202
48003	-0.153195	0.0243579	-13.4965	1.08e-34	1.1e-31	68.0423
15722	-0.152745	0.17565	-4.92702	1.21e-06	2.82e-05	4.52016
14711	-0.152623	0.493367	-3.66117	0.000283352	0.00327747	-0.665969
58115	-0.152446	0.139162	-4.33186	1.85e-05	0.000318515	1.90767
665	-0.152353	0.80642	-2.65999	0.00811573	0.0492744	-3.74603
54928	-0.152226	0.521762	-4.20683	3.17e-05	0.000508902	1.39766
31138	-0.152136	0.597532	-5.43097	9.54e-08	2.81e-06	6.9648
52926	-0.151613	0.599794	-3.13863	0.00181803	0.0151975	-2.38959
21048	-0.150707	0.43778	-4.52748	7.8e-06	0.000148778	2.73284
49415	-0.150378	0.196562	-2.89386	0.00400511	0.0284082	-3.11012
72838	-0.150277	0.29697	-2.70749	0.00705836	0.0443929	-3.62106
10831	-0.15023	0.353867	-4.66797	4.11e-06	8.58e-05	3.34586
26178	-0.150007	0.388354	-3.46792	0.000579084	0.00591695	-1.33258
55200	-0.149721	0.578532	-3.00685	0.00279946	0.0213196	-2.78447
88186	-0.149358	0.785105	-2.77238	0.00581426	0.0383649	-3.44686
84141	-0.149236	0.528879	-4.08401	5.31e-05	0.00078387	0.910061
12761	-0.149197	0.721774	-6.68431	7.47e-11	3.88e-09	13.9161
20994	-0.149129	0.811487	-4.83824	1.85e-06	4.15e-05	4.11131
32879	-0.148569	0.417294	-4.84987	1.75e-06	3.95e-05	4.16449
29683	-0.148183	0.526252	-2.91839	0.00370904	0.0267336	-3.04045
38168	-0.148061	0.312721	-3.31947	0.000981191	0.00912499	-1.82148
49086	-0.147531	0.459291	-4.11046	4.76e-05	0.000712677	1.01397
82608	-0.147509	0.329117	-3.05727	0.00237747	0.0187489	-2.6353
24126	-0.14718	0.653584	-2.86713	0.00435224	0.0302673	-3.18541
52136	-0.14717	0.629851	-5.25411	2.38e-07	6.48e-06	6.08309
68877	-0.146131	0.570216	-4.29299	2.19e-05	0.000366788	1.74767
29320	-0.145603	0.294473	-6.4642	2.85e-10	1.35e-08	12.6091
28799	-0.145383	0.713583	-4.06244	5.8e-05	0.000845224	0.825801
46699	-0.14511	0.584133	-4.06947	5.64e-05	0.000824431	0.853249
48160	-0.144944	0.531839	-3.80162	0.000165212	0.00207235	-0.160251
203434	-0.144886	0.0562732	-13.4135	2.36e-34	2.3e-31	67.2674
9179	-0.144576	0.461485	-3.70808	0.00023708	0.00280444	-0.499058
7539	-0.144553	0.425744	-2.94141	0.00344941	0.0251836	-2.97454
14453	-0.144325	0.521104	-3.17577	0.00160544	0.013743	-2.27539
87829	-0.144309	0.582156	-3.44082	0.000638503	0.00643033	-1.42334
13493	-0.144062	0.46856	-3.49018	0.000534195	0.00553648	-1.25755
69718	-0.144058	0.353859	-3.58906	0.000371351	0.00410278	-0.918698
87749	-0.143934	0.796013	-3.00955	0.00277523	0.0211998	-2.77655
80904	-0.143569	0.682183	-3.05445	0.00239945	0.0189004	-2.64371
69315	-0.143253	0.538558	-3.81236	0.000158427	0.00199395	-0.120859
2794	-0.143063	0.155871	-4.55314	6.95e-06	0.000135128	2.84357
58232	-0.142738	0.805172	-4.81902	2.02e-06	4.52e-05	4.02367
58198	-0.142729	0.737164	-4.2575	2.56e-05	0.000420682	1.60268
38667	-0.142635	0.462696	-3.42786	0.000668882	0.00667038	-1.4665
565	-0.142286	0.284034	-5.75685	1.66e-08	5.66e-07	8.65526
51133	-0.141729	0.560908	-3.94234	9.46e-05	0.00128932	0.364239
86657	-0.1414	0.484401	-4.25163	2.62e-05	0.000429915	1.57884
79927	-0.141084	0.639039	-5.76107	1.63e-08	5.54e-07	8.6777
60964	-0.140981	0.369275	-3.65585	0.000289109	0.00333031	-0.684784
84309	-0.140584	0.646817	-3.52199	0.000475652	0.00501312	-1.1495
77335	-0.140583	0.668076	-4.04942	6.12e-05	0.000884276	0.775152
14599	-0.140147	0.418628	-3.4413	0.000637407	0.00642217	-1.42175
49715	-0.140122	0.291415	-5.01645	7.81e-07	1.89e-05	4.93868
68208	-0.14006	0.724506	-2.77128	0.00583372	0.0384671	-3.44987
73604	-0.139901	0.506679	-4.20978	3.13e-05	0.000504308	1.40957
767	-0.139898	0.679908	-3.70812	0.000237043	0.00280444	-0.498914
63158	-0.13967	0.272357	-6.2953	7.79e-10	3.44e-08	11.6305
77155	-0.139553	0.530148	-2.84216	0.00470095	0.0322524	-3.25513
8338	-0.139542	0.308011	-2.827	0.00492495	0.0334616	-3.29719
82995	-0.139116	0.198608	-3.81356	0.000157683	0.00198569	-0.116433
31750	-0.138939	0.825987	-3.15275	0.00173436	0.0146289	-2.34634
22720	-0.138447	0.110673	-4.09908	4.99e-05	0.000742252	0.969183
62232	-0.13787	0.61617	-4.85406	1.71e-06	3.88e-05	4.18369
1860	-0.137332	0.2384	-3.01393	0.00273631	0.020974	-2.76367
85919	-0.137188	0.661822	-6.15969	1.72e-09	7.11e-08	10.8602
29647	-0.137001	0.754427	-4.14786	4.07e-05	0.00062506	1.1619
61880	-0.136837	0.570098	-2.75774	0.00607621	0.0396039	-3.48651
86321	-0.136733	0.489814	-4.10425	4.88e-05	0.000728903	0.989504
45429	-0.136652	0.614165	-2.96934	0.00315672	0.0234667	-2.89389
51413	-0.136462	0.452988	-3.15912	0.00169775	0.0143687	-2.32675
33192	-0.136322	0.134974	-7.29538	1.51e-12	9.93e-11	17.7263
89247	-0.13626	0.332275	-4.40554	1.34e-05	0.000238568	2.21458
38958	-0.136254	0.82506	-2.66754	0.00793875	0.0484227	-3.72632
24518	-0.136246	0.550031	-3.8639	0.000129367	0.00168	0.0696771
62161	-0.136177	0.475776	-3.68929	0.00025469	0.00298598	-0.566162
29906	-0.135833	0.428841	-3.94524	9.35e-05	0.00127749	0.375229
45479	-0.13563	0.758304	-5.83639	1.07e-08	3.78e-07	9.08064
64742	-0.135584	0.541463	-4.17193	3.68e-05	0.000574765	1.25776
63157	-0.134953	0.330934	-3.77059	0.000186394	0.00230327	-0.273516
48815	-0.134379	0.352392	-4.38573	1.47e-05	0.000258651	2.13161
38620	-0.134271	0.479664	-3.73801	0.000211371	0.00255285	-0.391483
58470	-0.133931	0.460915	-3.29207	0.00107925	0.00988782	-1.90949
37476	-0.133898	0.624625	-4.633	4.83e-06	9.83e-05	3.19166
57365	-0.133864	0.415657	-7.53548	3.06e-13	2.22e-11	19.294
2492	-0.133286	0.791461	-3.18123	0.00157622	0.0135654	-2.25851
70247	-0.133147	0.545427	-3.00219	0.00284171	0.0215755	-2.79813
88909	-0.132965	0.632721	-3.40545	0.000724634	0.00713468	-1.54079
37186	-0.132313	0.279864	-5.82911	1.12e-08	3.9e-07	9.04154
87776	-0.131951	0.626915	-4.85069	1.74e-06	3.94e-05	4.16826
38175	-0.1317	0.14326	-3.08243	0.00218952	0.0175318	-2.55997
26271	-0.131545	0.566834	-3.68847	0.000255482	0.00299371	-0.569069
67169	-0.131417	0.832004	-4.47102	1e-05	0.000186109	2.49128
77096	-0.131397	0.0889067	-5.22902	2.7e-07	7.29e-06	5.96008
63395	-0.13124	0.568015	-3.03249	0.00257697	0.0199918	-2.70891
82147	-0.130769	0.615664	-3.25656	0.00121991	0.0109615	-2.02255
16589	-0.130674	0.364139	-5.19365	3.23e-07	8.55e-06	5.78752
4174	-0.130193	0.491767	-3.16289	0.0016764	0.0142364	-2.31513
3941	-0.130184	0.823344	-4.47886	9.7e-06	0.000180455	2.52465
81563	-0.130039	0.654109	-2.74466	0.0063192	0.0408671	-3.52177
74778	-0.129879	0.746935	-6.4528	3.05e-10	1.44e-08	12.5424
68461	-0.129638	0.632239	-2.8639	0.00439606	0.0305342	-3.19448
80925	-0.129578	0.743085	-2.86863	0.00433215	0.0301519	-3.18122
25927	-0.129521	0.404788	-4.97077	9.76e-07	2.33e-05	4.72405
18710	-0.129519	0.853679	-4.43754	1.17e-05	0.000212312	2.34933
7591	-0.129365	0.252778	-5.17009	3.64e-07	9.52e-06	5.6732
17833	-0.128493	0.291095	-3.53605	0.000451748	0.00482007	-1.10146
89594	-0.128107	0.413048	-3.43121	0.000660916	0.00660563	-1.45538
69313	-0.128061	0.725723	-5.87433	8.69e-09	3.13e-07	9.28533
42075	-0.128056	0.778228	-2.74115	0.00638579	0.0412145	-3.53119
14941	-0.127832	0.540641	-2.70793	0.00704899	0.0443712	-3.61987
1778	-0.127693	0.641606	-3.82705	0.000149568	0.00190057	-0.0667784
76561	-0.127437	0.119624	-4.58958	5.89e-06	0.000116631	3.00173
76934	-0.127431	0.565167	-6.20671	1.31e-09	5.54e-08	11.1257
34292	-0.127296	0.388758	-2.76367	0.00596895	0.0391094	-3.47049
32162	-0.12627	0.710085	-3.43009	0.000663569	0.00662624	-1.4591
55300	-0.126237	0.615822	-3.41755	0.000694013	0.00688731	-1.50073
64571	-0.126172	0.336032	-2.78319	0.00562754	0.0373834	-3.41747
81586	-0.125978	0.367106	-4.61508	5.24e-06	0.000105559	3.11308
25524	-0.125904	0.57295	-3.07906	0.0022139	0.0176766	-2.57011
69002	-0.125625	0.524517	-2.90108	0.00391578	0.0279603	-3.08966
81670	-0.125504	0.412622	-2.89795	0.00395434	0.028146	-3.09855
69824	-0.125095	0.382744	-2.7357	0.00649067	0.0417066	-3.54582
55443	-0.124811	0.252999	-2.68796	0.00747701	0.0462719	-3.67269
85543	-0.124721	0.783649	-4.33614	1.82e-05	0.000313363	1.92536
36018	-0.124168	0.28697	-4.31614	1.99e-05	0.000336364	1.8428
34443	-0.124047	0.485518	-3.93529	9.73e-05	0.00131442	0.33751
87514	-0.12321	0.805822	-4.20008	3.27e-05	0.000521205	1.37054
74127	-0.122904	0.810009	-2.73206	0.00656151	0.0420893	-3.55557
87608	-0.122869	0.373263	-4.10639	4.84e-05	0.000723401	0.997936
73913	-0.122708	0.203233	-4.30048	2.12e-05	0.000356447	1.77839
60468	-0.122665	0.8254	-5.61049	3.68e-08	1.18e-06	7.88557
60626	-0.122533	0.742842	-3.0996	0.00206923	0.0168331	-2.50824
40526	-0.122297	0.611414	-3.04896	0.00244271	0.0191557	-2.66004
76572	-0.121828	0.681009	-4.02538	6.76e-05	0.000967762	0.682019
25060	-0.121668	0.502904	-3.10862	0.00200852	0.0163927	-2.48096
36287	-0.121302	0.291754	-3.50087	0.000513805	0.00536232	-1.22133
8790	-0.120762	0.414338	-3.93075	9.91e-05	0.00133618	0.320337
58408	-0.120483	0.665604	-4.63506	4.78e-06	9.77e-05	3.20073
12983	-0.120113	0.541315	-3.65913	0.000285544	0.00329943	-0.673178
46624	-0.119895	0.721707	-3.14841	0.00175971	0.0147982	-2.35966
53065	-0.11974	0.72855	-3.09527	0.00209896	0.0170255	-2.5213
913	-0.119522	0.363732	-2.91736	0.00372099	0.0268083	-3.04337
16865	-0.119079	0.376229	-3.62334	0.000326723	0.00368229	-0.799128
83290	-0.118772	0.223926	-5.9323	6.28e-09	2.32e-07	9.60014
23742	-0.118555	0.739718	-5.43161	9.51e-08	2.81e-06	6.96803
89563	-0.118509	0.765747	-3.12695	0.00189013	0.0156485	-2.42526
16464	-0.11822	0.790117	-5.40163	1.11e-07	3.23e-06	6.81679
43116	-0.118207	0.377013	-4.97959	9.35e-07	2.24e-05	4.76538
62152	-0.118109	0.800428	-5.59986	3.9e-08	1.24e-06	7.83035
74316	-0.118026	0.547639	-2.99674	0.00289196	0.0218829	-2.81411
44335	-0.117904	0.614261	-4.06124	5.83e-05	0.000848848	0.821141
72903	-0.117503	0.520991	-4.14418	4.13e-05	0.000633043	1.14728
58332	-0.117451	0.586878	-5.19516	3.21e-07	8.49e-06	5.79489
25558	-0.11717	0.662056	-4.07132	5.59e-05	0.000819073	0.860447
11048	-0.117168	0.176	-3.88371	0.0001196	0.00157233	0.143558
21952	-0.117046	0.696601	-3.23163	0.0013286	0.0118245	-2.10123
27492	-0.115923	0.633388	-4.59695	5.69e-06	0.000113276	3.03386
20839	-0.115918	0.814809	-3.08437	0.00217562	0.0174579	-2.55414
71161	-0.115738	0.832207	-3.57527	0.000390856	0.0042818	-0.96647
23563	-0.115602	0.794831	-3.96897	8.5e-05	0.00117433	0.465449
25400	-0.115361	0.74863	-6.3243	6.56e-10	2.95e-08	11.797
85672	-0.115316	0.147762	-6.79728	3.7e-11	2.05e-09	14.6005
55939	-0.115249	0.535363	-4.53999	7.37e-06	0.00014177	2.78675
73183	-0.115189	0.410421	-2.77264	0.00580982	0.0383581	-3.44617
47968	-0.11505	0.272311	-3.51649	0.000485316	0.00510777	-1.16823
51641	-0.114757	0.282996	-3.15998	0.00169285	0.014338	-2.3241
87104	-0.114353	0.254687	-3.23334	0.00132085	0.0117649	-2.09583
51221	-0.114268	0.84351	-4.15264	3.99e-05	0.000615595	1.18091
29625	-0.114251	0.881368	-3.50757	0.000501396	0.00524991	-1.19858
9320	-0.113654	0.849091	-2.80046	0.00534039	0.0358419	-3.37027
81940	-0.113628	0.501853	-2.94252	0.0034373	0.0251277	-2.97134
26708	-0.113429	0.620406	-2.71873	0.00682689	0.0433136	-3.59116
21316	-0.113334	0.75385	-3.00724	0.00279592	0.0213007	-2.78332
4086	-0.113079	0.843582	-3.49371	0.000527375	0.00548353	-1.24559
84373	-0.112941	0.86935	-3.00855	0.00278414	0.0212464	-2.77947
69716	-0.112935	0.787698	-3.03561	0.00255102	0.0198385	-2.69967
32895	-0.112924	0.639288	-3.1545	0.00172419	0.0145486	-2.34094
68039	-0.112903	0.29926	-3.68044	0.000263401	0.00307685	-0.597645
57675	-0.112743	0.32755	-5.34112	1.52e-07	4.32e-06	6.5137
69499	-0.11272	0.527288	-3.71141	0.000234078	0.00277795	-0.487121
58657	-0.112626	0.594489	-3.01749	0.00270508	0.0207844	-2.75319
47083	-0.11241	0.314178	-4.03571	6.48e-05	0.00093246	0.721969
32924	-0.112162	0.842394	-4.42442	1.24e-05	0.000223018	2.29399
20202	-0.111968	0.387817	-2.96745	0.0031758	0.0235772	-2.89938
29652	-0.111934	0.767239	-3.33003	0.000945649	0.0088815	-1.78736
57807	-0.110983	0.509872	-3.20116	0.00147359	0.0128999	-2.19658
58438	-0.110807	0.756693	-4.24414	2.71e-05	0.000442497	1.54843
86500	-0.110755	0.740185	-3.05212	0.00241776	0.0189998	-2.65066
38483	-0.11052	0.544756	-3.71453	0.000231302	0.00275061	-0.475943
43157	-0.11037	0.825573	-4.71332	3.33e-06	7.12e-05	3.54729
77063	-0.110345	0.437787	-3.5035	0.0005089	0.00532023	-1.2124
7898	-0.109673	0.477975	-2.95037	0.00335293	0.0246475	-2.94875
48231	-0.10913	0.595194	-2.67296	0.00781377	0.0478034	-3.71212
59190	-0.109103	0.389151	-2.8927	0.00401971	0.0284645	-3.11341
16403	-0.108914	0.41169	-3.16265	0.00167778	0.0142427	-2.31589
56594	-0.108873	0.794918	-4.84686	1.77e-06	4e-05	4.15071
68610	-0.108647	0.225513	-7.38078	8.61e-13	5.87e-11	18.2794
37672	-0.108604	0.822843	-3.16924	0.00164105	0.0140105	-2.29555
83369	-0.108559	0.825023	-4.01763	6.97e-05	0.000993846	0.652082
68267	-0.108471	0.776839	-3.05286	0.00241193	0.0189806	-2.64845
65672	-0.108048	0.863905	-3.27186	0.00115734	0.0104792	-1.97399
75130	-0.107996	0.45876	-3.21195	0.00142064	0.012495	-2.16291
86655	-0.107956	0.260199	-4.59274	5.8e-06	0.000115268	3.0155
46239	-0.107804	0.543118	-3.26984	0.00116541	0.0105437	-1.9804
48755	-0.107682	0.403639	-4.19589	3.32e-05	0.00052941	1.3537
29224	-0.107644	0.851391	-3.20177	0.00147056	0.0128785	-2.19469
53087	-0.107405	0.766972	-3.90739	0.000108841	0.00145044	0.232325
83216	-0.107106	0.347325	-3.90936	0.000107992	0.00144104	0.239698
48020	-0.106679	0.46118	-3.9333	9.81e-05	0.00132336	0.329988
29445	-0.106678	0.600765	-2.90638	0.00385136	0.0276499	-3.07462
90669	-0.106278	0.769869	-3.68632	0.000257582	0.00301517	-0.576734
43494	-0.106022	0.751328	-3.91606	0.000105141	0.00140866	0.26491
3546	-0.105648	0.0742854	-7.88965	2.69e-14	2.21e-12	21.6763
80128	-0.105269	0.380384	-3.31793	0.000986468	0.00916508	-1.82643
34463	-0.104888	0.307459	-4.2742	2.38e-05	0.000394762	1.67078
43547	-0.104629	0.824448	-2.65601	0.00821044	0.049688	-3.7564
62180	-0.104607	0.5466	-3.57896	0.000385549	0.00424434	-0.953715
90198	-0.104574	0.581448	-2.86879	0.00432994	0.0301519	-3.18076
87876	-0.104394	0.794109	-4.75287	2.77e-06	6.02e-05	3.72444
7832	-0.104245	0.83993	-3.78847	0.000173892	0.00217394	-0.20834
31792	-0.104052	0.785583	-3.36434	0.000838294	0.00805884	-1.67583
35532	-0.103861	0.629055	-4.13654	4.27e-05	0.00064961	1.117
16965	-0.103836	0.452147	-3.09029	0.00213366	0.0172456	-2.53632
15436	-0.103401	0.859147	-3.03958	0.0025184	0.0196199	-2.68792
73831	-0.10323	0.194772	-3.76085	0.000193551	0.00237532	-0.308874
80322	-0.102972	0.821234	-5.32904	1.62e-07	4.56e-06	6.45354
48159	-0.102917	0.731525	-4.12498	4.48e-05	0.000676714	1.07125
86615	-0.102858	0.19967	-4.30719	2.06e-05	0.000347979	1.80595
88886	-0.102847	0.780228	-5.41566	1.03e-07	3.02e-06	6.88748
69530	-0.102838	0.530837	-3.72299	0.000223926	0.00267708	-0.44557
21352	-0.102782	0.471053	-3.65272	0.000292541	0.0033595	-0.695819
17294	-0.102732	0.338369	-3.06439	0.00232288	0.0183895	-2.61406
59258	-0.102545	0.617079	-3.86256	0.000130056	0.00168606	0.0646821
86444	-0.102084	0.621262	-3.62429	0.000325567	0.0036711	-0.795816
46263	-0.102052	0.496397	-4.36035	1.64e-05	0.000285702	2.02577
35695	-0.101933	0.668722	-3.53515	0.00045324	0.00483141	-1.10454
26130	-0.101869	0.183993	-4.96012	1.03e-06	2.42e-05	4.6743
49011	-0.101816	0.74987	-4.02295	6.82e-05	0.000976186	0.672626
54830	-0.101786	0.53163	-3.10271	0.0020481	0.0166914	-2.49884
49337	-0.101431	0.833727	-3.31075	0.00101148	0.00937029	-1.84958
50528	-0.101309	0.605222	-4.18625	3.46e-05	0.000547993	1.31503
61857	-0.10127	0.31158	-2.75436	0.00613813	0.0399147	-3.49563
71173	-0.101099	0.138922	-2.76381	0.00596644	0.0391044	-3.47011
85418	-0.100819	0.132142	-3.48384	0.000546631	0.00564189	-1.27895
60760	-0.10079	0.407012	-2.948	0.00337826	0.0247687	-2.95559
86447	-0.100651	0.79295	-3.28023	0.00112437	0.010233	-1.94731
8275	-0.100626	0.1061	-3.91211	0.000106811	0.00142763	0.250059
50346	-0.100497	0.798413	-4.15271	3.99e-05	0.000615595	1.18117
78304	-0.10034	0.837347	-4.02577	6.75e-05	0.000966838	0.683525
88778	-0.0999316	0.833542	-4.1491	4.05e-05	0.000623095	1.16683
10317	-0.099804	0.839838	-6.99503	1.06e-11	6.32e-10	15.8206
58451	-0.0997677	0.523367	-4.02096	6.88e-05	0.000982262	0.664959
50149	-0.0996459	0.714483	-3.63145	0.00031693	0.00359904	-0.770688
71547	-0.0991594	0.820885	-2.89264	0.00402038	0.0284645	-3.11356
11122	-0.0991481	0.492011	-3.22915	0.00133988	0.0118919	-2.10901
36151	-0.099102	0.24915	-2.6856	0.00752919	0.0465064	-3.67892
65221	-0.099093	0.697253	-5.13612	4.32e-07	1.11e-05	5.50911
48746	-0.0990822	0.368995	-4.18766	3.44e-05	0.000546226	1.32069
73954	-0.0990148	0.875907	-2.67378	0.00779506	0.0477453	-3.70998
13408	-0.0987541	0.24415	-2.702	0.00717377	0.044867	-3.6356
86895	-0.0986734	0.15668	-3.07453	0.00224705	0.0178903	-2.58371
47612	-0.098316	0.188016	-6.6758	7.87e-11	4.06e-09	13.8649
38890	-0.0982521	0.181514	-4.73297	3.04e-06	6.57e-05	3.63514
62268	-0.0982223	0.1343	-4.45743	1.07e-05	0.000196594	2.43353
61985	-0.0981008	0.739643	-3.52648	0.000467898	0.00495702	-1.13419
89964	-0.0979058	0.569702	-3.51913	0.000480655	0.00506109	-1.15924
22251	-0.0978243	0.300259	-5.23404	2.63e-07	7.13e-06	5.98464
67746	-0.0978165	0.514998	-4.33595	1.82e-05	0.000313385	1.92457
69800	-0.0977401	0.678266	-3.76386	0.000191317	0.00235115	-0.29798
62719	-0.0976291	0.664182	-2.88184	0.00415796	0.0291968	-3.14406
51796	-0.0976063	0.857957	-2.79808	0.00537924	0.0360675	-3.3768
9240	-0.0974935	0.723238	-4.77335	2.51e-06	5.51e-05	3.81669
90291	-0.0974664	0.692506	-3.34764	0.00088907	0.00845634	-1.73028
12249	-0.0973376	0.0645237	-6.50354	2.25e-10	1.08e-08	12.84
78104	-0.0970118	0.754503	-5.29234	1.96e-07	5.44e-06	6.27155
13300	-0.0969727	0.609546	-2.65847	0.00815193	0.049454	-3.75
3074	-0.0969088	0.668938	-3.62007	0.000330752	0.00372395	-0.81058
72806	-0.0965847	0.565553	-3.78236	0.000178072	0.00221509	-0.230646
3672	-0.0965133	0.453763	-3.23182	0.00132773	0.0118215	-2.10062
18011	-0.0963835	0.245819	-4.01578	7.03e-05	0.00100075	0.644944
4205	-0.0963549	0.748151	-3.50626	0.000503805	0.00527268	-1.20304
53681	-0.0960717	0.781916	-4.05613	5.96e-05	0.000864084	0.801259
63313	-0.0959789	0.423568	-3.59561	0.000362407	0.00402778	-0.895941
65251	-0.0959333	0.659633	-3.94569	9.34e-05	0.00127673	0.376939
1128	-0.0957617	0.60047	-2.65916	0.00813541	0.0493671	-3.74819
1094	-0.0956845	0.850528	-3.15508	0.00172089	0.0145262	-2.33919
28542	-0.0956534	0.455037	-3.54968	0.000429646	0.00462163	-1.05471
7764	-0.0955985	0.799215	-3.40038	0.000737815	0.00723872	-1.55751
28376	-0.0955747	0.413643	-3.93649	9.69e-05	0.00131044	0.342081
64250	-0.095508	0.752054	-4.1862	3.46e-05	0.000547993	1.31483
18901	-0.0954865	0.158449	-3.96108	8.77e-05	0.00120736	0.43539
65201	-0.0951767	0.71616	-3.05324	0.00240896	0.0189639	-2.64733
19923	-0.0949414	0.440022	-3.64977	0.000295823	0.00339371	-0.706254
10370	-0.0949301	0.341559	-3.73238	0.000216001	0.00259758	-0.411798
75016	-0.0948619	0.377855	-2.74904	0.00623696	0.0404753	-3.50999
61715	-0.0947607	0.760331	-2.732	0.00656261	0.0420893	-3.55572
61244	-0.094718	0.698261	-2.80175	0.00531959	0.0357525	-3.36675
7711	-0.0947158	0.8701	-3.08908	0.00214223	0.0172765	-2.53999
59271	-0.0945175	0.473005	-2.78744	0.00555571	0.0369963	-3.4059
67269	-0.0945128	0.155725	-3.90237	0.000111044	0.00147154	0.213452
44395	-0.0945113	0.707222	-3.12525	0.00190078	0.0157168	-2.43042
47687	-0.0941283	0.41194	-2.89861	0.00394621	0.0281149	-3.09668
80979	-0.0940501	0.844388	-2.97034	0.00314673	0.0234366	-2.89101
75506	-0.0940216	0.666089	-4.60813	5.41e-06	0.000108496	3.08268
25242	-0.0935238	0.435306	-2.70114	0.00719211	0.0449382	-3.63789
221	-0.0932619	0.197909	-4.15201	4e-05	0.000616813	1.17838
38889	-0.0930005	0.293237	-4.11983	4.57e-05	0.000689087	1.05091
53054	-0.0929762	0.266271	-4.28284	2.29e-05	0.00038177	1.70609
8409	-0.0929416	0.525741	-2.98395	0.00301287	0.0226223	-2.85143
73507	-0.0929198	0.624588	-4.26338	2.49e-05	0.000411418	1.62662
39063	-0.092895	0.204228	-3.01852	0.00269608	0.0207336	-2.75015
45317	-0.0928604	0.709113	-3.74953	0.000202199	0.00246731	-0.349878
34064	-0.0927085	0.610858	-3.34512	0.000896973	0.00851346	-1.73847
87484	-0.0927063	0.740566	-3.55905	0.000415039	0.00449469	-1.02247
37702	-0.0926952	0.782892	-4.23424	2.82e-05	0.000458937	1.50829
16815	-0.092615	0.0580842	-9.6461	5.24e-20	8.64e-18	34.6164
25671	-0.0925815	0.315706	-2.71952	0.00681086	0.0432731	-3.58905
52612	-0.092409	0.401676	-3.83663	0.000144051	0.00183671	-0.031444
20854	-0.0921361	0.764089	-3.82234	0.000152359	0.00193135	-0.0841575
17640	-0.0918208	0.683353	-2.66677	0.00795653	0.0484895	-3.72832
59001	-0.091617	0.282395	-4.0091	7.22e-05	0.00102512	0.619225
86210	-0.0916035	0.770097	-4.5317	7.65e-06	0.000146221	2.75101
85436	-0.0915752	0.863172	-4.826	1.96e-06	4.39e-05	4.05546
3239	-0.0907784	0.724311	-3.65873	0.000285981	0.00330277	-0.674608
10772	-0.0905995	0.637287	-3.56362	0.000408083	0.0044338	-1.0067
30928	-0.0905855	0.199211	-2.70323	0.00714766	0.0447649	-3.63234
76324	-0.0904734	0.0937916	-4.33328	1.84e-05	0.000316806	1.91351
11433	-0.0904065	0.493324	-3.11563	0.00196241	0.016116	-2.45967
9652	-0.090316	0.363421	-2.74863	0.00624459	0.0405131	-3.51109
29476	-0.0901281	0.357079	-3.12613	0.00189528	0.0156796	-2.42776
11367	-0.0900489	0.646065	-3.06299	0.0023335	0.018454	-2.61823
86318	-0.089199	0.798545	-2.77216	0.00581826	0.03838	-3.44748
74045	-0.0891411	0.536127	-3.12153	0.00192443	0.0158592	-2.44175
10022	-0.0891366	0.744383	-4.28375	2.28e-05	0.000380562	1.70981
46539	-0.089009	0.726084	-4.79535	2.26e-06	5.03e-05	3.91616
9708	-0.0889672	0.719814	-3.69674	0.000247563	0.00291308	-0.539584
1250	-0.0889619	0.505419	-2.89968	0.00393298	0.0280652	-3.09364
21085	-0.0889038	0.839085	-3.32442	0.000964381	0.00900464	-1.8055
51111	-0.0885942	0.826254	-3.46729	0.000580414	0.00592784	-1.33471
25742	-0.0885306	0.775051	-3.73682	0.000212346	0.00256186	-0.395798
9054	-0.088516	0.774007	-2.97571	0.0030933	0.0231178	-2.87542
72416	-0.088387	0.328046	-5.64787	3.01e-08	9.76e-07	8.08057
61664	-0.088287	0.330768	-3.24935	0.00125045	0.0111912	-2.04535
617	-0.0882175	0.655498	-3.63892	0.000308164	0.0035066	-0.744469
72768	-0.0879737	0.762778	-2.79236	0.00547343	0.036546	-3.39245
77355	-0.0879273	0.80718	-3.88705	0.000118023	0.00155433	0.156053
77467	-0.0878664	0.76058	-3.88549	0.00011876	0.0015622	0.150191
52621	-0.0877932	0.503092	-2.86337	0.00440322	0.0305744	-3.19595
47933	-0.0870777	0.741401	-3.22615	0.00135365	0.0120046	-2.11843
79843	-0.0867484	0.421863	-3.45677	0.00060287	0.00611818	-1.36999
42665	-0.0867195	0.229417	-3.01604	0.00271774	0.0208602	-2.75745
22644	-0.0865188	0.113061	-5.14327	4.16e-07	1.08e-05	5.54353
18983	-0.0863175	0.792122	-3.60972	0.00034382	0.00384406	-0.846776
26653	-0.0861048	0.49842	-2.83802	0.00476131	0.0325767	-3.26666
12992	-0.0860516	0.13006	-4.28595	2.26e-05	0.000377252	1.71881
68643	-0.0858759	0.707938	-3.203	0.00146445	0.012835	-2.19086
52443	-0.0858108	0.156816	-3.20983	0.00143091	0.0125804	-2.16954
12516	-0.0857506	0.787089	-3.50778	0.000501019	0.00524841	-1.19788
38196	-0.0853464	0.819854	-3.02894	0.00260679	0.0201732	-2.71942
38182	-0.0853381	0.532925	-2.68096	0.0076324	0.0469819	-3.69111
27892	-0.0852213	0.788279	-4.32064	1.95e-05	0.000330873	1.86133
55974	-0.0851915	0.888123	-2.89673	0.00396941	0.0282353	-3.102
66051	-0.0851759	0.561143	-3.19134	0.00152336	0.0132323	-2.22714
7580	-0.0851639	0.105049	-3.98642	7.92e-05	0.00110599	0.532134
61054	-0.0845662	0.22302	-5.20316	3.08e-07	8.19e-06	5.83385
87583	-0.0842569	0.700168	-4.61492	5.24e-06	0.000105559	3.11238
89323	-0.0842361	0.876172	-3.32444	0.000964328	0.00900464	-1.80545
89320	-0.0841539	0.0801766	-5.93857	6.07e-09	2.25e-07	9.63439
9883	-0.0841341	0.560406	-3.02082	0.0026761	0.0206111	-2.74337
31528	-0.0839589	0.291489	-2.93798	0.00348697	0.0254162	-2.98438
46259	-0.083908	0.75879	-3.85337	0.00013486	0.0017373	0.030558
24898	-0.0838702	0.706879	-3.31521	0.000995888	0.00924432	-1.83522
48769	-0.0837115	0.431262	-3.29061	0.00108474	0.00993409	-1.91418
49433	-0.0836714	0.399058	-3.64225	0.000304325	0.00346996	-0.732751
52336	-0.0834599	0.67745	-3.16697	0.00165361	0.0141124	-2.30256
33572	-0.0833065	0.782912	-3.61884	0.000332278	0.00373551	-0.81488
9178	-0.0830624	0.302782	-2.76006	0.0060341	0.0394097	-3.48026
70454	-0.0828702	0.266991	-2.99647	0.00289445	0.0218938	-2.81489
88516	-0.0828353	0.75013	-3.91717	0.000104673	0.00140391	0.269112
13642	-0.0827629	0.835389	-2.9581	0.00327168	0.0241452	-2.92644
74932	-0.0826652	0.785834	-3.39477	0.000752687	0.00735246	-1.57601
58743	-0.0819148	0.504667	-2.74076	0.00639337	0.0412516	-3.53225
75391	-0.0818013	0.709791	-3.93667	9.68e-05	0.00131044	0.342764
78239	-0.081707	0.878749	-3.08967	0.00213804	0.0172552	-2.5382
686	-0.0816822	0.678925	-4.25861	2.54e-05	0.000419288	1.60723
47236	-0.0815885	0.640852	-3.83939	0.000142495	0.00182163	-0.0212364
10458	-0.0814807	0.858591	-4.40088	1.37e-05	0.000243132	2.19503
52953	-0.0814709	0.322801	-5.53576	5.49e-08	1.7e-06	7.49913
85146	-0.0811815	0.854256	-2.7473	0.00626945	0.0406039	-3.51466
70141	-0.081017	0.635144	-2.924	0.00364419	0.0263397	-3.02444
26701	-0.0808667	0.474978	-2.71863	0.00682908	0.0433152	-3.59145
1273	-0.0808644	0.763101	-4.2318	2.85e-05	0.000463064	1.49842
46522	-0.0808544	0.866005	-3.79313	0.000170772	0.0021397	-0.191339
32804	-0.0808496	0.782652	-2.73846	0.00643733	0.0414875	-3.53841
35998	-0.0807612	0.474636	-3.88322	0.000119834	0.00157448	0.141719
45841	-0.0805847	0.111047	-3.33993	0.000913439	0.00865558	-1.7553
29088	-0.0805058	0.499306	-6.44228	3.25e-10	1.52e-08	12.4809
47570	-0.0803216	0.439677	-4.71679	3.27e-06	7.02e-05	3.56282
69795	-0.0800466	0.846366	-4.00117	7.46e-05	0.00104946	0.58874
48310	-0.079612	0.771838	-3.01881	0.00269357	0.0207243	-2.7493
90465	-0.0796008	0.725854	-3.22064	0.00137927	0.0121885	-2.1357
27377	-0.0795013	0.798886	-2.90597	0.00385636	0.0276681	-3.0758
50517	-0.0793098	0.155643	-3.8627	0.000129982	0.00168606	0.0652124
72405	-0.0790717	0.244628	-5.61859	3.53e-08	1.13e-06	7.92775
53467	-0.0789882	0.236397	-3.44065	0.000638889	0.00643133	-1.4239
40319	-0.078897	0.493431	-2.74237	0.00636262	0.0410768	-3.52792
24854	-0.0787391	0.818124	-3.23835	0.00129844	0.0115929	-2.08007
42571	-0.0786185	0.777597	-2.77285	0.00580611	0.038345	-3.4456
46695	-0.0780055	0.42544	-2.78529	0.00559193	0.0372154	-3.41175
83970	-0.0779995	0.265109	-3.77711	0.000181738	0.00225194	-0.249771
60951	-0.0779218	0.827836	-3.83344	0.000145866	0.00185774	-0.0432161
13407	-0.0777253	0.558644	-4.18475	3.48e-05	0.000549855	1.30905
80119	-0.0776754	0.581413	-3.0158	0.00271987	0.0208694	-2.75817
72281	-0.0775268	0.805744	-2.78031	0.00567686	0.0375887	-3.42533
25006	-0.0772519	0.714665	-3.31977	0.000980164	0.00912499	-1.82051
40644	-0.0771231	0.18634	-3.19634	0.00149784	0.0130561	-2.2116
74148	-0.0769206	0.810818	-3.08916	0.00214161	0.0172765	-2.53972
4377	-0.0767729	0.625875	-3.21738	0.00139467	0.0123051	-2.14592
26006	-0.0767692	0.420178	-2.89359	0.00400853	0.0284235	-3.11089
16348	-0.0766917	0.834468	-2.72083	0.00678457	0.0431427	-3.58558
28490	-0.0765852	0.904549	-3.14511	0.00177918	0.0149272	-2.36976
34386	-0.0765424	0.877895	-3.5526	0.000425044	0.00458974	-1.04467
18556	-0.0765198	0.8635	-3.28226	0.00111651	0.0101793	-1.94084
85794	-0.0763812	0.886354	-4.59253	5.81e-06	0.000115279	3.01457
84375	-0.0763246	0.883855	-4.42967	1.21e-05	0.000218954	2.31612
81834	-0.0763078	0.829056	-3.48962	0.000535279	0.00554514	-1.25943
42617	-0.0758574	0.80697	-3.01155	0.00275738	0.0211043	-2.77066
83474	-0.0757977	0.251374	-2.97646	0.00308594	0.0230807	-2.87325
60452	-0.0757637	0.452006	-3.73893	0.000210629	0.002548	-0.388186
43210	-0.0755789	0.347614	-3.30557	0.00102984	0.00951506	-1.8662
77972	-0.0755208	0.681165	-2.83431	0.00481573	0.0328789	-3.27693
12122	-0.0752286	0.430312	-3.33411	0.00093226	0.00878887	-1.77417
61794	-0.0751226	0.344008	-2.68678	0.00750315	0.0463583	-3.67582
72388	-0.0748058	0.764863	-2.8237	0.00497491	0.0337397	-3.3063
48716	-0.0747388	0.146037	-2.83227	0.00484603	0.0330455	-3.28259
85821	-0.0747148	0.136918	-2.9185	0.00370774	0.0267336	-3.04013
68056	-0.074711	0.849801	-4.46468	1.03e-05	0.000190972	2.46433
54419	-0.073882	0.817476	-3.21877	0.00138808	0.0122566	-2.14156
75388	-0.0737098	0.796114	-2.94069	0.00345723	0.025224	-2.9766
53868	-0.0736835	0.792003	-5.01653	7.8e-07	1.89e-05	4.93902
30988	-0.0735912	0.0384644	-8.00009	1.24e-14	1.09e-12	22.4358
39461	-0.0734847	0.847708	-4.55283	6.96e-06	0.000135203	2.84221
29415	-0.0733915	0.818292	-3.51279	0.000491935	0.00516531	-1.18084
70509	-0.0732018	0.597515	-2.88808	0.00407798	0.0287671	-3.12646
68260	-0.0730353	0.1375	-3.99774	7.56e-05	0.00106103	0.575549
69021	-0.0729318	0.853162	-2.79926	0.00535998	0.0359598	-3.37357
22393	-0.0728724	0.311472	-2.94941	0.00336311	0.0246899	-2.95151
25772	-0.0727253	0.595454	-4.42876	1.21e-05	0.00021961	2.31229
69550	-0.0726837	0.114204	-5.58028	4.33e-08	1.36e-06	7.72881
53777	-0.0719912	0.882128	-5.90368	7.38e-09	2.7e-07	9.44439
12578	-0.071819	0.407814	-3.13623	0.00183266	0.0152856	-2.39694
77642	-0.0718058	0.874	-3.69253	0.000251562	0.00295239	-0.554589
32919	-0.0716574	0.913905	-3.3381	0.000919301	0.00869962	-1.76122
12842	-0.0716341	0.706433	-3.24419	0.00127275	0.0113771	-2.06165
39393	-0.0714692	0.592022	-2.75148	0.00619149	0.0402268	-3.50342
40481	-0.0712902	0.0417029	-6.446	3.18e-10	1.49e-08	12.5026
58720	-0.0709987	0.822086	-3.06034	0.00235375	0.0185749	-2.62613
58896	-0.0709877	0.200576	-3.17668	0.00160053	0.0137189	-2.27257
83912	-0.070906	0.55257	-2.88872	0.00406989	0.0287262	-3.12466
37565	-0.0708213	0.883372	-3.41379	0.000703401	0.00697123	-1.5132
66931	-0.0705835	0.844872	-2.67636	0.00773626	0.047448	-3.7032
26405	-0.0705068	0.846393	-4.27561	2.37e-05	0.000392665	1.67654
57460	-0.070211	0.896017	-3.35786	0.000857661	0.00820545	-1.69698
13664	-0.0701987	0.716766	-3.65571	0.000289256	0.00333031	-0.685259
11105	-0.0699832	0.834593	-2.68508	0.0075407	0.0465519	-3.68029
62347	-0.0697789	0.842893	-3.13308	0.00185195	0.015395	-2.40655
22370	-0.0697779	0.199899	-3.65847	0.00028626	0.00330429	-0.67552
67560	-0.0694714	0.36025	-2.97635	0.00308697	0.0230807	-2.87356
19988	-0.0692862	0.143684	-5.78277	1.44e-08	4.98e-07	8.79337
87935	-0.0692268	0.858636	-2.90323	0.00388964	0.0278179	-3.08359
90467	-0.0687115	0.875491	-3.90888	0.000108197	0.00144271	0.237915
51454	-0.0685992	0.510166	-2.99316	0.00292536	0.0220753	-2.82457
64850	-0.0684306	0.814064	-3.76796	0.0001883	0.00232075	-0.283063
9413	-0.0683536	0.929664	-4.16118	3.85e-05	0.000597193	1.21489
10338	-0.0683391	0.528462	-3.18326	0.00156544	0.0135007	-2.2522
84894	-0.0682153	0.715617	-3.14641	0.00177145	0.0148855	-2.36577
45501	-0.0677581	0.840627	-3.23505	0.00131314	0.0117009	-2.09044
23862	-0.0677318	0.142694	-5.10129	5.13e-07	1.29e-05	5.34183
78109	-0.0676454	0.546566	-3.52273	0.000474369	0.00500901	-1.14698
7814	-0.067615	0.383574	-2.93224	0.00355082	0.0257644	-3.00086
80664	-0.0675617	0.120751	-2.96872	0.00316304	0.0235059	-2.89571
60374	-0.0672672	0.826764	-3.53078	0.000460567	0.00489323	-1.11948
26932	-0.0671935	0.804192	-3.50131	0.000512986	0.00535626	-1.21985
19025	-0.0669303	0.282233	-2.84305	0.0046881	0.0321839	-3.25265
40518	-0.066913	0.85646	-2.80503	0.00526667	0.0354398	-3.35773
67724	-0.0668702	0.777022	-2.90473	0.00387139	0.0277227	-3.07932
13400	-0.0668078	0.900692	-3.29887	0.0010541	0.009701	-1.88771
62434	-0.066609	0.10634	-3.64318	0.000303259	0.00346132	-0.729469
13590	-0.0664534	0.0604935	-6.61783	1.12e-10	5.62e-09	13.5176
65812	-0.0664251	0.918989	-3.4507	0.00061622	0.00623111	-1.39035
69042	-0.0662679	0.773586	-3.0702	0.00227908	0.0181131	-2.59665
63754	-0.0662449	0.876008	-3.85085	0.000136205	0.00175362	0.0212189
24879	-0.0659629	0.843509	-3.03533	0.00255332	0.0198495	-2.70049
32523	-0.0659451	0.116042	-4.21469	3.07e-05	0.000495158	1.42935
33081	-0.065784	0.830601	-2.93536	0.00351603	0.0255699	-2.99192
50450	-0.0655835	0.919392	-3.32657	0.000957174	0.00895972	-1.79856
54288	-0.0655409	0.832107	-3.26719	0.00117612	0.0106192	-1.98884
61261	-0.0655401	0.787392	-3.89482	0.000114436	0.00151063	0.185117
70799	-0.0652088	0.81715	-3.26293	0.00119346	0.0107498	-2.00234
59332	-0.0651657	0.0360806	-7.98119	1.42e-14	1.23e-12	22.3053
13328	-0.065107	0.713021	-2.67021	0.00787691	0.048111	-3.71932
46276	-0.0650356	0.0806048	-5.61946	3.51e-08	1.13e-06	7.93228
60152	-0.0650193	0.838636	-3.08306	0.00218504	0.0175084	-2.5581
3002	-0.0649591	0.856383	-4.65423	4.38e-06	9.07e-05	3.28513
41706	-0.0648208	0.498489	-2.94184	0.00344469	0.0251653	-2.97329
80064	-0.0648115	0.861066	-2.82946	0.00488798	0.0332709	-3.29038
47274	-0.0645627	0.793477	-3.80943	0.000160248	0.00201572	-0.131592
58542	-0.0644429	0.833913	-4.3516	1.7e-05	0.000295218	1.98943
12178	-0.0641762	0.114436	-3.35042	0.00088041	0.00838821	-1.72122
68554	-0.0640318	0.815963	-2.66282	0.00804885	0.0489611	-3.73863
87579	-0.0639211	0.879727	-3.7885	0.000173872	0.00217394	-0.208235
44462	-0.0638744	0.54955	-3.16322	0.00167457	0.0142352	-2.31413
14175	-0.0638093	0.111423	-3.45035	0.000616997	0.00623614	-1.39152
43872	-0.0637992	0.41508	-2.78137	0.00565868	0.0375412	-3.42244
44211	-0.063791	0.59464	-4.18913	3.42e-05	0.000543604	1.32659
50230	-0.0635298	0.865253	-5.70991	2.15e-08	7.17e-07	8.40656
89285	-0.0633977	0.0957103	-3.33706	0.000922665	0.00871673	-1.7646
53646	-0.0633451	0.0661763	-4.30859	2.05e-05	0.000346243	1.8117
34004	-0.0632033	0.851754	-3.03956	0.00251853	0.0196199	-2.68796
23467	-0.0631531	0.788212	-3.57583	0.000390051	0.00427778	-0.964546
19059	-0.062511	0.775583	-5.56076	4.81e-08	1.5e-06	7.62793
55893	-0.0624802	0.265476	-2.65769	0.00817048	0.0495362	-3.75204
77013	-0.0623424	0.217512	-3.2181	0.00139125	0.0122798	-2.14366
11846	-0.0620559	0.895612	-2.79027	0.00550826	0.0367458	-3.39817
66783	-0.0620188	0.869369	-3.06927	0.00228604	0.018162	-2.59944
85532	-0.0619657	0.91033	-5.24084	2.54e-07	6.9e-06	6.01798
67033	-0.0617805	0.890854	-3.53087	0.000460417	0.00489323	-1.11917
38771	-0.0617195	0.887533	-3.31343	0.00100206	0.00929451	-1.84093
85405	-0.061683	0.758731	-2.79649	0.00540524	0.0361877	-3.38115
27113	-0.0615038	0.868034	-2.72166	0.00676773	0.0430478	-3.58335
38937	-0.0614539	0.843966	-2.73646	0.0064759	0.0416553	-3.54378
62072	-0.0613414	0.879894	-3.32824	0.000951584	0.0089223	-1.79314
52628	-0.0612704	0.92292	-2.92085	0.00368041	0.0265758	-3.03342
68257	-0.0611922	0.881363	-5.77114	1.54e-08	5.27e-07	8.73136
54671	-0.0611511	0.815581	-2.78819	0.00554298	0.0369334	-3.40383
48718	-0.0609471	0.864786	-2.99565	0.00290204	0.0219296	-2.81728
22144	-0.0608574	0.150525	-2.97513	0.003099	0.0231488	-2.8771
53845	-0.0607281	0.792038	-2.77744	0.00572621	0.0378731	-3.43312
66717	-0.0605737	0.819764	-3.18004	0.00158255	0.0136095	-2.26219
94884	-0.060514	0.139194	-3.08118	0.00219856	0.0175917	-2.56375
53645	-0.0604905	0.164664	-3.59232	0.000366876	0.00407139	-0.907381
57143	-0.0604897	0.850728	-3.91705	0.000104723	0.00140391	0.268657
29817	-0.0602855	0.888755	-3.65928	0.000285384	0.00329927	-0.672653
528	-0.0602639	0.528017	-3.00252	0.00283874	0.0215602	-2.79718
44114	-0.0600925	0.868171	-3.30144	0.00104473	0.0096306	-1.87947
58744	-0.0600378	0.889839	-3.90102	0.000111641	0.00147722	0.208399
81911	-0.0599962	0.819589	-2.7191	0.0068195	0.0433034	-3.59019
60269	-0.0595639	0.85338	-3.61777	0.000333616	0.00374679	-0.818633
9130	-0.0593602	0.762812	-2.72937	0.00661429	0.0423118	-3.56276
17871	-0.0593589	0.0284077	-11.129	2.3e-25	7.25e-23	46.7953
13684	-0.059299	0.155107	-3.66407	0.000280259	0.00324839	-0.655699
58307	-0.0591526	0.896589	-2.79366	0.00545187	0.0364346	-3.38889
55733	-0.0587544	0.881174	-3.03296	0.00257308	0.0199754	-2.70753
3538	-0.0582421	0.929858	-2.71097	0.006986	0.0440639	-3.61182
17034	-0.0582346	0.861976	-2.82408	0.00496911	0.0337208	-3.30525
68609	-0.0581321	0.0391682	-9.82492	1.25e-20	2.19e-18	36.0295
79112	-0.0580519	0.866003	-2.76046	0.00602688	0.039397	-3.47918
79060	-0.0578707	0.238376	-4.05962	5.87e-05	0.000852871	0.814832
79219	-0.0575055	0.929898	-3.40671	0.000721375	0.00711477	-1.53661
23697	-0.0573812	0.896885	-3.27891	0.00112952	0.0102687	-1.95153
74047	-0.0573466	0.164939	-4.21936	3.01e-05	0.000486126	1.44818
14667	-0.0573446	0.767004	-3.36422	0.000838671	0.00805901	-1.67625
61329	-0.0571474	0.393977	-2.71954	0.00681046	0.0432731	-3.589
247	-0.0570404	0.3616	-3.39983	0.000739261	0.00724952	-1.55932
75241	-0.0569256	0.32963	-3.0961	0.00209324	0.0169853	-2.51881
56560	-0.0568737	0.90258	-2.95763	0.00327661	0.0241656	-2.92781
87446	-0.0568712	0.854624	-3.26258	0.00119492	0.0107586	-2.00347
69253	-0.056716	0.22183	-3.99771	7.56e-05	0.00106103	0.575431
28353	-0.0566709	0.686579	-2.70081	0.00719912	0.044963	-3.63876
23652	-0.0566268	0.935568	-2.98114	0.00304014	0.0228041	-2.85964
36192	-0.0566236	0.129592	-2.76313	0.00597856	0.0391273	-3.47194
26933	-0.0564774	0.827742	-3.36172	0.000846096	0.00811297	-1.68441
44659	-0.0564236	0.87912	-2.87881	0.00419733	0.0294089	-3.15259
39539	-0.0563291	0.831358	-2.92671	0.00361322	0.0261495	-3.01669
74519	-0.0555108	0.883512	-5.32923	1.62e-07	4.56e-06	6.45449
39914	-0.0551769	0.88011	-2.74671	0.0062805	0.0406637	-3.51625
4336	-0.0548486	0.0124024	-11.6184	3.18e-27	1.17e-24	51.0249
78964	-0.0547652	0.893014	-3.09928	0.00207142	0.0168387	-2.50921
15923	-0.0543551	0.0970208	-4.33773	1.81e-05	0.000311678	1.93195
88392	-0.0540444	0.880823	-4.30399	2.09e-05	0.000351357	1.79277
55516	-0.0540025	0.817978	-3.17061	0.00163356	0.013956	-2.29135
7565	-0.0539632	0.239211	-2.98854	0.00296895	0.0223449	-2.83805
35827	-0.0539459	0.917422	-2.74419	0.00632807	0.040889	-3.52303
1656	-0.0536609	0.0623151	-7.08328	6.03e-12	3.74e-10	16.374
72727	-0.0535619	0.0897464	-4.50121	8.78e-06	0.000164635	2.6201
40137	-0.0535113	0.811568	-2.65325	0.00827686	0.0499686	-3.76359
73439	-0.0532048	0.15784	-4.17906	3.57e-05	0.000560866	1.28626
58952	-0.0531657	0.874935	-3.08663	0.00215949	0.0173595	-2.54733
61342	-0.0530855	0.92438	-3.53007	0.000461777	0.00490144	-1.12192
40975	-0.052998	0.0611584	-3.58033	0.00038359	0.0042276	-0.948962
31084	-0.0527612	0.767021	-3.19904	0.0014842	0.0129725	-2.20318
32937	-0.0527456	0.909815	-2.78498	0.00559709	0.0372386	-3.41258
45450	-0.0527053	0.877054	-3.87134	0.000125611	0.00163982	0.0973998
54060	-0.0526652	0.764881	-4.04964	6.12e-05	0.00088423	0.776029
82596	-0.0517717	0.914518	-2.71234	0.00695763	0.0439318	-3.60817
42078	-0.0513293	0.888041	-2.87994	0.00418271	0.029343	-3.14943
26186	-0.050788	0.07821	-4.38855	1.45e-05	0.000255672	2.14339
12939	-0.0506451	0.153589	-3.48468	0.000544958	0.00562981	-1.2761
17161	-0.0506341	0.852778	-4.38221	1.49e-05	0.000262069	2.11687
72007	-0.0500684	0.12115	-2.84068	0.00472249	0.0323803	-3.25926
72614	-0.0498634	0.887166	-3.01227	0.002751	0.021065	-2.76855
50420	-0.0498128	0.0342409	-5.98896	4.57e-09	1.73e-07	9.91039
71020	-0.0491717	0.9199	-3.90661	0.000109183	0.00145265	0.229371
26110	-0.0490291	0.894326	-2.905	0.0038681	0.027721	-3.07855
81053	-0.0490138	0.924598	-5.97994	4.8e-09	1.81e-07	9.86086
44119	-0.0489729	0.00408469	-12.4805	1.36e-30	9.56e-28	58.6936
2183	-0.048817	0.348149	-2.89506	0.00399024	0.0283206	-3.10674
29919	-0.048715	0.898189	-3.81535	0.000156585	0.0019763	-0.109866
84333	-0.0485682	0.913166	-3.67388	0.000270035	0.00314616	-0.620927
60904	-0.0484835	0.0652309	-2.95317	0.00332329	0.0244457	-2.94068
26303	-0.0484719	0.935884	-3.51547	0.00048714	0.00512457	-1.17172
76139	-0.0483143	0.330371	-3.18321	0.00156569	0.0135007	-2.25235
44723	-0.0481749	0.0572675	-4.62453	5.02e-06	0.000101739	3.15451
22229	-0.0481321	0.92154	-4.51125	8.39e-06	0.000158569	2.66313
61836	-0.0479687	0.721133	-3.57592	0.000389914	0.00427778	-0.964218
48169	-0.0476188	0.372293	-3.53094	0.000460303	0.00489323	-1.11894
61023	-0.0475396	0.819732	-2.70287	0.00715532	0.044784	-3.63329
64290	-0.0474762	0.826356	-3.04169	0.00250119	0.0195329	-2.68165
12933	-0.0473777	0.910639	-3.87235	0.00012511	0.00163614	0.101161
72766	-0.0473694	0.904173	-3.05223	0.00241688	0.0189998	-2.65032
14097	-0.0469714	0.114448	-2.94554	0.00340459	0.0249211	-2.96265
40135	-0.0467564	0.119579	-3.06273	0.00233546	0.0184548	-2.619
46254	-0.0465759	0.0606411	-3.6178	0.000333584	0.00374679	-0.818544
48215	-0.0463406	0.820187	-2.67261	0.00782178	0.0478393	-3.71304
26559	-0.0462922	0.104617	-3.45628	0.000603948	0.00612428	-1.37165
36729	-0.0461561	0.871516	-3.16291	0.00167629	0.0142364	-2.31507
36161	-0.0457717	0.479351	-3.58945	0.000370805	0.00409877	-0.917325
44254	-0.0455579	0.891718	-2.69144	0.00740089	0.0458782	-3.66353
77906	-0.0452128	0.822395	-2.94299	0.00343219	0.0250986	-2.96999
73716	-0.04518	0.896289	-3.5599	0.000413737	0.00448491	-1.01953
59772	-0.0451376	0.548004	-2.79783	0.00538319	0.0360743	-3.37746
8916	-0.0451331	0.838445	-2.92195	0.00366778	0.026493	-3.0303
60601	-0.0450511	0.930207	-3.28015	0.00112468	0.010233	-1.94757
43354	-0.0449704	0.848637	-2.89928	0.00393799	0.0280823	-3.09479
66901	-0.0449574	0.202765	-2.85806	0.00447619	0.0309661	-3.21082
3354	-0.0449018	0.242397	-3.30489	0.0010323	0.00953164	-1.8684
75983	-0.0447434	0.874496	-2.66621	0.00796958	0.0485448	-3.72978
39598	-0.0446599	0.931896	-3.71139	0.000234097	0.00277795	-0.487195
84389	-0.0446073	0.930141	-3.53282	0.000457132	0.00486595	-1.1125
40209	-0.0445155	0.132434	-3.35653	0.000861695	0.00823789	-1.70132
31540	-0.0444376	0.89084	-2.71099	0.00698551	0.0440639	-3.61176
43660	-0.0442306	0.875785	-3.46984	0.000575071	0.0058813	-1.32612
70844	-0.044206	0.899009	-3.15618	0.00171452	0.0144833	-2.33578
67600	-0.0438115	0.814111	-2.88615	0.00410257	0.0288984	-3.13191
36479	-0.0436822	0.0318297	-5.42425	9.88e-08	2.9e-06	6.93082
81187	-0.0433702	0.114012	-2.82152	0.00500831	0.033915	-3.31234
68270	-0.0429717	0.131724	-3.0407	0.00250924	0.0195679	-2.68459
58672	-0.0423659	0.931149	-2.80159	0.0053221	0.0357525	-3.36717
80973	-0.0423581	0.879862	-3.12034	0.00193205	0.0159115	-2.44538
28841	-0.0422424	0.934636	-3.87654	0.00012305	0.00161296	0.116785
79952	-0.0422175	0.933354	-3.15112	0.00174383	0.0146866	-2.35134
22146	-0.0420995	0.101004	-5.81966	1.18e-08	4.09e-07	8.99076
2182	-0.0420153	0.900926	-2.66908	0.00790293	0.0482304	-3.72227
20072	-0.0419268	0.916005	-3.80467	0.000163256	0.00205012	-0.149068
15716	-0.0418907	0.898798	-3.66621	0.000278005	0.00322728	-0.648146
78549	-0.0418812	0.899659	-2.88587	0.00410623	0.0289151	-3.13271
80357	-0.0417033	0.914966	-3.33149	0.000940839	0.00885486	-1.78264
60534	-0.0415576	0.949537	-3.43329	0.000655989	0.00656516	-1.44843
43574	-0.041503	0.946941	-2.84294	0.00468978	0.0321856	-3.25298
94942	-0.041407	0.879328	-3.03426	0.00256219	0.0199047	-2.70366
41826	-0.0412479	0.123838	-2.99036	0.00295173	0.0222376	-2.83275
42507	-0.0409008	0.711522	-3.04549	0.00247046	0.0193529	-2.67036
26931	-0.0408634	0.917862	-3.60573	0.000348978	0.00389785	-0.860684
43478	-0.0406947	0.0541919	-5.26613	2.24e-07	6.15e-06	6.1422
18486	-0.0405707	0.0434208	-5.45431	8.44e-08	2.52e-06	7.08302
65601	-0.0404674	0.922019	-2.78098	0.00566536	0.0375674	-3.4235
48608	-0.0404529	0.897423	-2.82821	0.00490679	0.0333584	-3.29385
90319	-0.0403574	0.868882	-3.10838	0.00201012	0.0163997	-2.48168
28556	-0.0399083	0.913095	-4.16671	3.76e-05	0.000585885	1.23696
35995	-0.0399073	0.416665	-2.96812	0.00316904	0.0235426	-2.89744
89730	-0.0398742	0.927801	-2.89271	0.00401954	0.0284645	-3.11338
54316	-0.0396727	0.909994	-3.03885	0.00252437	0.0196517	-2.69008
17157	-0.0394777	0.0650694	-3.33293	0.00093611	0.00881406	-1.77798
60435	-0.039396	0.693516	-2.93992	0.00346568	0.0252775	-2.97881
36001	-0.0391451	0.871497	-2.66128	0.00808523	0.0491158	-3.74266
31014	-0.0391203	0.930147	-3.59848	0.000358552	0.00399682	-0.885955
8787	-0.0387719	0.936296	-4.04497	6.24e-05	0.000899992	0.757891
7800	-0.0386494	0.889602	-3.82223	0.000152421	0.00193135	-0.0845361
62123	-0.0381078	0.908451	-2.82433	0.00496533	0.0337053	-3.30456
17344	-0.0380043	0.0875232	-3.90169	0.000111344	0.00147416	0.210909
46452	-0.0379233	0.912737	-2.70551	0.00709964	0.0445775	-3.62629
16588	-0.0378539	0.882688	-2.87869	0.00419896	0.0294111	-3.15294
86400	-0.0378356	0.950674	-3.02957	0.00260143	0.0201537	-2.71754
60805	-0.0378055	0.929944	-3.13076	0.0018663	0.0155085	-2.41363
37221	-0.0376145	0.896722	-3.09421	0.00210634	0.0170668	-2.52452
48187	-0.0374454	0.888678	-3.45846	0.000599206	0.00608649	-1.36433
25597	-0.0372895	0.935448	-4.22015	3e-05	0.00048486	1.45134
46853	-0.0372867	0.383808	-3.13351	0.00184929	0.0153785	-2.40523
58576	-0.0371353	0.922653	-3.1872	0.00154479	0.0133616	-2.23999
69447	-0.0371128	0.185774	-2.90675	0.00384695	0.0276271	-3.07358
74497	-0.0370218	0.950287	-4.406	1.34e-05	0.000238276	2.2165
8458	-0.0368784	0.0587136	-4.71424	3.31e-06	7.1e-05	3.55143
765	-0.036815	0.915453	-3.57505	0.000391181	0.0042818	-0.967245
36249	-0.0366208	0.893639	-2.66673	0.00795747	0.0484895	-3.72842
78802	-0.0365341	0.935137	-2.83727	0.00477229	0.0326419	-3.26874
24772	-0.036488	0.07906	-3.66738	0.000276777	0.00321711	-0.644002
14146	-0.0362922	0.947494	-3.08999	0.00213579	0.0172484	-2.53723
46822	-0.0362414	0.881885	-2.94558	0.00340418	0.0249211	-2.96254
42667	-0.0361376	0.142168	-3.7305	0.000217566	0.00261218	-0.418562
2806	-0.0359368	0.880107	-2.73219	0.006559	0.0420893	-3.55523
2558	-0.0356576	0.874784	-3.29466	0.00106963	0.00981973	-1.90122
13922	-0.0356251	0.935857	-3.32771	0.00095336	0.00893148	-1.79487
49699	-0.0355539	0.0531148	-3.61081	0.000342413	0.00383315	-0.842946
66704	-0.0354659	0.241188	-3.76656	0.000189325	0.00232923	-0.288161
39819	-0.0350669	0.0530376	-3.12824	0.001882	0.0156158	-2.42131
25298	-0.0348652	0.938788	-3.54889	0.000430896	0.00463285	-1.05742
36625	-0.0348103	0.925883	-3.0433	0.00248811	0.0194572	-2.67686
22724	-0.0347193	0.930664	-3.07489	0.00224438	0.0178753	-2.58262
28429	-0.0346115	0.937304	-2.66352	0.00803255	0.0488828	-3.73682
18390	-0.034386	0.865461	-3.39379	0.00075533	0.00737186	-1.57926
30638	-0.0343228	0.95279	-4.06041	5.85e-05	0.000851021	0.817925
84849	-0.0340654	0.92262	-2.82235	0.00499562	0.0338495	-3.31005
49608	-0.0337977	0.061249	-4.41574	1.28e-05	0.000229705	2.25745
22145	-0.0334434	0.923598	-3.80797	0.000161166	0.00202614	-0.136963
51205	-0.0332023	0.925886	-3.11418	0.00197186	0.0161759	-2.46407
17170	-0.0329662	0.101817	-3.8541	0.00013447	0.0017336	0.0332796
52269	-0.0328815	0.924345	-2.75948	0.00604452	0.0394662	-3.48181
77187	-0.0328805	0.939461	-3.74591	0.000205043	0.00249546	-0.362978
63550	-0.0328363	0.938209	-3.17734	0.00159699	0.0137073	-2.27054
12854	-0.0326313	0.929457	-4.17458	3.64e-05	0.000569558	1.26837
778	-0.0325338	0.0813818	-3.49601	0.000522988	0.00544801	-1.23782
43788	-0.0324459	0.939639	-4.41751	1.27e-05	0.000228287	2.26487
87825	-0.0324436	0.94871	-4.00795	7.26e-05	0.00102737	0.614798
3687	-0.0324268	0.931089	-3.80066	0.000165829	0.00207893	-0.163752
52138	-0.032394	0.623068	-2.76657	0.00591696	0.0388596	-3.46262
37289	-0.0323133	0.878556	-2.75089	0.0062024	0.040286	-3.505
26417	-0.0320767	0.0644603	-2.93426	0.00352817	0.0256203	-2.99505
25783	-0.0317997	0.946272	-3.08058	0.00220291	0.0176076	-2.56555
41931	-0.0315782	0.928268	-3.36594	0.000833585	0.00803077	-1.67061
11359	-0.0315008	0.947415	-3.04229	0.00249631	0.0195078	-2.67987
61040	-0.0314273	0.0849644	-2.67894	0.00767782	0.0471905	-3.69642
58453	-0.0312875	0.951529	-3.3983	0.000743316	0.00727678	-1.5644
62840	-0.0307043	0.908202	-2.78326	0.00562631	0.0373834	-3.41727
19552	-0.0306296	0.881578	-3.10994	0.00199973	0.0163388	-2.47694
2994	-0.0305163	0.921776	-4.11807	4.61e-05	0.000693244	1.04394
18182	-0.0303158	0.942789	-2.91862	0.0037063	0.0267336	-3.03978
2696	-0.0302165	0.934173	-3.69383	0.000250326	0.00294097	-0.549978
81714	-0.0300602	0.0522641	-2.92565	0.00362526	0.0262197	-3.01971
57392	-0.0299817	0.898113	-3.85891	0.000131943	0.00170659	0.0511259
16983	-0.0297945	0.895397	-3.53328	0.000456355	0.00485999	-1.11092
83807	-0.028992	0.927357	-2.88673	0.00409515	0.0288552	-3.13027
58132	-0.0289414	0.017311	-4.64674	4.53e-06	9.31e-05	3.25211
7946	-0.0287596	0.957442	-3.18847	0.00153817	0.01333	-2.23604
74764	-0.0285361	0.929477	-3.04631	0.00246386	0.019308	-2.66792
71125	-0.0282689	0.967248	-2.73569	0.00649077	0.0417066	-3.54584
55593	-0.0281817	0.955273	-2.89206	0.00402777	0.0284968	-3.11523
68318	-0.0280481	0.953911	-2.89888	0.00394288	0.0281	-3.09592
26175	-0.028018	0.944471	-2.77087	0.0058409	0.0384948	-3.45098
82834	-0.0274835	0.96255	-3.77881	0.000180544	0.00224086	-0.243586
26001	-0.0273647	0.932242	-3.10242	0.00205006	0.0166953	-2.49971
33350	-0.0272922	0.0446483	-3.32056	0.000977485	0.00910425	-1.81798
52618	-0.0272637	0.955202	-3.43461	0.000652902	0.0065401	-1.44405
74805	-0.0272248	0.0484337	-2.76445	0.00595483	0.0390512	-3.46836
29213	-0.027216	0.943526	-3.86718	0.0001277	0.00166129	0.081877
43131	-0.0269546	0.0476337	-3.28156	0.00111923	0.0101958	-1.94308
22694	-0.0269298	0.913473	-2.76335	0.00597472	0.0391244	-3.47136
39062	-0.0266526	0.14869	-2.91677	0.00372794	0.0268498	-3.04506
43490	-0.0264867	0.0278278	-5.89841	7.6e-09	2.77e-07	9.4158
65391	-0.0263416	0.939514	-2.81096	0.00517244	0.0348895	-3.34144
81180	-0.0262742	0.947462	-2.93594	0.00350951	0.0255556	-2.99023
8440	-0.0262243	0.926499	-2.72655	0.00667005	0.0425835	-3.5703
36478	-0.0259769	0.0227617	-5.32929	1.62e-07	4.56e-06	6.45477
32404	-0.0257885	0.958431	-3.61572	0.00033619	0.00376786	-0.825815
30985	-0.0256714	0.958243	-3.45125	0.00061498	0.00622418	-1.38847
62992	-0.025417	0.938033	-2.75632	0.00610214	0.0397037	-3.49034
42929	-0.0251013	0.96414	-2.95993	0.00325276	0.0240451	-2.92116
46476	-0.0248556	0.0557373	-4.33824	1.8e-05	0.000311225	1.93406
16624	-0.0246917	0.957383	-2.74305	0.00634972	0.0410053	-3.5261
71409	-0.0246764	0.02294	-2.90128	0.00391337	0.0279519	-3.0891
80951	-0.0246476	0.932489	-2.73516	0.00650116	0.0417549	-3.54727
72182	-0.0245805	0.946926	-3.30598	0.0010284	0.00950742	-1.86491
89023	-0.0245206	0.957447	-3.66808	0.000276039	0.00321276	-0.641503
88692	-0.024504	0.944594	-2.81644	0.00508658	0.0344034	-3.32634
63727	-0.0244802	0.954201	-3.14202	0.0017976	0.0150435	-2.37922
84593	-0.02432	0.958459	-2.94477	0.00341292	0.0249739	-2.96487
59288	-0.0242594	0.970622	-4.63724	4.73e-06	9.69e-05	3.21032
51202	-0.0237827	0.038272	-3.77789	0.000181189	0.00224762	-0.246932
36514	-0.0237727	0.970866	-3.06774	0.00229753	0.0182274	-2.60403
88633	-0.0237193	0.961959	-2.66144	0.00808134	0.0491055	-3.74223
28832	-0.0236925	0.957448	-2.68224	0.00760376	0.0468509	-3.68774
17393	-0.0236875	0.947784	-3.38792	0.000771219	0.00750407	-1.59856
73398	-0.0235586	0.956139	-3.78266	0.000177867	0.00221377	-0.229564
41034	-0.0233018	0.9273	-3.51078	0.000495557	0.00519681	-1.18767
64531	-0.0231935	0.954882	-3.71662	0.00022946	0.00273595	-0.46845
68087	-0.0230554	0.950593	-4.90282	1.36e-06	3.15e-05	4.40807
7278	-0.0230105	0.962467	-3.19202	0.00151986	0.0132224	-2.22502
21297	-0.0227947	0.946762	-2.72793	0.00664284	0.0424339	-3.56663
22376	-0.0226875	0.934549	-3.35986	0.000851636	0.00815912	-1.69045
79744	-0.022592	0.959982	-2.72202	0.00676051	0.0430224	-3.58239
80014	-0.0220318	0.0477696	-3.97716	8.22e-05	0.00114259	0.496715
17008	-0.0219942	0.960306	-3.17981	0.00158376	0.0136146	-2.26289
84266	-0.0218516	0.944568	-2.87493	0.00424823	0.0296968	-3.16351
25655	-0.0215421	0.96189	-3.05437	0.00240005	0.0189004	-2.64394
81337	-0.0213449	0.953531	-3.12941	0.00187471	0.0155726	-2.41775
21700	-0.0209677	0.955291	-2.79334	0.00545717	0.0364591	-3.38977
48461	-0.0205787	0.952462	-3.31291	0.00100387	0.00930751	-1.8426
21643	-0.0204406	0.964983	-3.06265	0.00233606	0.0184548	-2.61924
67080	-0.0198845	0.909356	-4.02279	6.83e-05	0.000976187	0.672023
67978	-0.019781	0.97426	-2.98779	0.00297613	0.0223839	-2.84025
59080	-0.0193857	0.0624849	-3.09725	0.00208532	0.0169332	-2.51533
63291	-0.0192439	0.978199	-3.16538	0.0016625	0.0141612	-2.30748
19915	-0.019183	0.967568	-2.71664	0.00686935	0.0434968	-3.59672
47563	-0.0191293	0.0493823	-2.65701	0.00818662	0.0496106	-3.7538
79736	-0.0189539	0.910487	-3.13715	0.00182706	0.0152559	-2.39414
84374	-0.0187516	0.931559	-2.68092	0.0076334	0.0469819	-3.69123
51790	-0.0185644	0.966506	-3.78425	0.000176769	0.00220255	-0.22375
7490	-0.0182694	0.94185	-3.07892	0.00221492	0.0176784	-2.57053
48419	-0.0182095	0.975671	-3.02471	0.0026427	0.0203819	-2.73191
90622	-0.0181343	0.956848	-2.69737	0.00727265	0.0453086	-3.64787
37299	-0.0178591	0.958016	-3.52256	0.000474664	0.00500977	-1.14756
15738	-0.0174353	0.967194	-3.25078	0.00124434	0.011141	-2.04084
16726	-0.0174266	0.946044	-3.92409	0.000101813	0.00136817	0.295212
65453	-0.0174003	0.0333696	-3.53137	0.000459574	0.00488962	-1.11747
67871	-0.0170712	0.0346627	-2.75907	0.00605205	0.0394722	-3.48293
52599	-0.0170484	0.969879	-3.25467	0.00122783	0.0110241	-2.02852
1537	-0.0169486	0.944153	-3.92532	0.000101313	0.00136225	0.299858
50035	-0.016903	0.936355	-3.12695	0.00189009	0.0156485	-2.42524
17979	-0.0164514	0.976896	-3.19687	0.00149512	0.0130426	-2.20993
55871	-0.0162729	0.972351	-2.85638	0.00449946	0.0310791	-3.21551
32952	-0.0162426	0.967038	-3.00723	0.00279603	0.0213007	-2.78336
25293	-0.0160607	0.970885	-3.98948	7.82e-05	0.00109301	0.543859
38301	-0.0160068	0.0364261	-3.9407	9.53e-05	0.00129628	0.358021
25027	-0.0159576	0.969652	-3.26547	0.00118309	0.0106649	-1.99429
78705	-0.0159341	0.965253	-3.00322	0.00283235	0.021519	-2.79513
31852	-0.0159083	0.969599	-3.42328	0.000679953	0.00676574	-1.48174
48649	-0.0158822	0.973382	-3.22234	0.00137134	0.0121279	-2.13039
85819	-0.0156516	0.96287	-2.80681	0.00523827	0.0352699	-3.35285
23737	-0.015506	0.969336	-4.48147	9.59e-06	0.000178504	2.53581
67705	-0.0154654	0.945227	-3.00638	0.00280374	0.0213377	-2.78587
35993	-0.0153534	0.964387	-2.71781	0.00684562	0.0434078	-3.59362
1246	-0.0152561	0.0242163	-6.01033	4.04e-09	1.55e-07	10.0281
72391	-0.0151138	0.978257	-2.66265	0.00805287	0.0489723	-3.73908
59286	-0.0150642	0.0225469	-4.96665	9.96e-07	2.36e-05	4.70478
7960	-0.0150018	0.976301	-2.84113	0.00471589	0.0323449	-3.25799
18113	-0.0147694	0.97177	-3.47971	0.000554886	0.00570348	-1.29289
70130	-0.0147068	0.0124933	-5.60387	3.82e-08	1.22e-06	7.85116
13102	-0.0144997	0.978938	-2.68737	0.00748999	0.0462989	-3.67425
26572	-0.0142957	0.976722	-3.57788	0.000387089	0.00425361	-0.957433
10585	-0.0140188	0.969961	-3.06079	0.00235032	0.0185544	-2.6248
47509	-0.0139203	0.972791	-2.92236	0.00366304	0.0264674	-3.02912
42502	-0.0137328	0.0161019	-5.13316	4.38e-07	1.13e-05	5.49483
50497	-0.0136912	0.980384	-2.88464	0.00412196	0.0289985	-3.13618
26059	-0.0136799	0.0199734	-4.16787	3.74e-05	0.000583855	1.24156
8038	-0.013617	0.974576	-2.6701	0.00787945	0.0481133	-3.71961
88701	-0.013611	0.0166287	-3.70522	0.000239683	0.00283225	-0.509286
69058	-0.0133449	0.961209	-3.69257	0.000251526	0.00295239	-0.554457
16362	-0.0132797	0.97254	-2.91197	0.0037845	0.0272135	-3.05873
64016	-0.0131619	0.975036	-2.78939	0.00552284	0.036832	-3.40055
46286	-0.0131476	0.966124	-3.17662	0.00160086	0.0137189	-2.27277
3483	-0.0130273	0.981586	-3.40166	0.000734469	0.00721574	-1.55329
3279	-0.0129709	0.980777	-2.82931	0.00489021	0.033276	-3.29079
84149	-0.0129461	0.981532	-3.03204	0.0025807	0.0200069	-2.71023
49226	-0.0127005	0.965093	-2.86573	0.00437112	0.0303892	-3.18933
44825	-0.0125366	0.969081	-2.96639	0.00318661	0.023634	-2.90247
22492	-0.012509	0.00141746	-11.7292	1.19e-27	4.69e-25	51.9956
88927	-0.0123165	0.00666962	-7.40653	7.26e-13	5.01e-11	18.4472
78308	-0.012196	0.963874	-2.92483	0.00363462	0.0262789	-3.02205
45630	-0.0121769	0.013466	-3.50341	0.000509061	0.00532023	-1.2127
41171	-0.0121043	0.982246	-3.29251	0.0010776	0.00988347	-1.90808
78803	-0.011611	0.983322	-2.84891	0.0046043	0.0317057	-3.23635
33218	-0.011489	0.0214333	-2.68834	0.00746862	0.0462469	-3.67169
7826	-0.011392	0.965626	-2.83505	0.00480485	0.0328146	-3.27488
44201	-0.0112759	0.975626	-2.70557	0.00709852	0.0445775	-3.62615
33329	-0.0110484	0.987385	-2.65655	0.00819759	0.0496442	-3.755
39967	-0.0108353	0.978752	-3.14968	0.0017522	0.0147406	-2.35574
44243	-0.0107915	0.985125	-2.85198	0.0045609	0.0314551	-3.22778
50670	-0.0105727	0.911761	-3.04973	0.0024366	0.0191211	-2.65775
50659	-0.0103967	0.954476	-2.74764	0.00626315	0.040596	-3.51376
86191	-0.0103266	0.986322	-2.96959	0.00315429	0.0234641	-2.89319
43228	-0.0103226	0.983262	-4.17203	3.68e-05	0.000574765	1.25816
88928	-0.0100155	0.00462392	-7.73935	7.63e-14	5.88e-12	20.6553
80998	-0.00981504	0.985121	-3.16059	0.00168943	0.0143145	-2.32224
49599	-0.00980125	0.97766	-4.18185	3.53e-05	0.000555456	1.29745
40816	-0.00944411	0.00770096	-4.83839	1.85e-06	4.15e-05	4.11199
49232	-0.00928271	0.990297	-2.99473	0.00291069	0.0219801	-2.81999
17185	-0.00914135	0.0251531	-3.30651	0.0010265	0.00949827	-1.8632
67647	-0.00910702	0.984286	-2.77006	0.00585509	0.0385549	-3.45316
44175	-0.00906391	0.981974	-2.84041	0.00472633	0.0323968	-3.25999
36226	-0.00891729	0.987735	-2.80345	0.00529213	0.0355898	-3.36208
23946	-0.00882231	0.988394	-3.99309	7.71e-05	0.00107845	0.557694
74220	-0.00864787	0.991145	-2.71269	0.00695049	0.0439171	-3.60725
66431	-0.00843384	0.983928	-2.7957	0.00541815	0.0362633	-3.3833
24737	-0.00842907	0.0140593	-6.1269	2.08e-09	8.41e-08	10.6761
54438	-0.00842331	0.989017	-2.68788	0.00747885	0.0462719	-3.67291
59478	-0.00829649	0.0125175	-3.3736	0.000811349	0.00784351	-1.64557
62136	-0.00826867	0.986412	-2.79382	0.00544916	0.0364273	-3.38844
85441	-0.00819323	0.985369	-4.11676	4.63e-05	0.000696557	1.03879
10222	-0.00809724	0.987334	-2.93102	0.00356446	0.0258457	-3.00435
24221	-0.00801454	0.983581	-3.34568	0.000895196	0.00850379	-1.73663
43561	-0.00789348	0.985971	-2.99588	0.00289994	0.0219211	-2.81662
1074	-0.00771053	0.97825	-3.0485	0.00244644	0.0191781	-2.66143
10929	-0.00768672	0.0130995	-3.23015	0.0013353	0.0118654	-2.10586
24778	-0.00764962	0.990861	-3.42231	0.000682306	0.00678615	-1.48494
71419	-0.00764812	0.982257	-2.65692	0.00818881	0.0496106	-3.75404
59880	-0.00750351	0.989695	-3.09857	0.00207625	0.0168718	-2.51134
38387	-0.00738822	0.988653	-3.29524	0.00106746	0.00980386	-1.89935
22165	-0.00724837	0.00590215	-5.125	4.56e-07	1.17e-05	5.45557
24501	-0.00672531	0.97977	-2.70366	0.00713869	0.044735	-3.63121
43928	-0.00638371	0.98707	-3.04157	0.00250212	0.0195329	-2.682
16639	-0.00621403	0.970011	-2.73108	0.00658073	0.0421693	-3.5582
50606	-0.0059792	0.97664	-2.72899	0.00662188	0.0423242	-3.56379
42498	-0.00578872	0.990432	-2.73387	0.00652626	0.0418921	-3.55073
51812	-0.00573058	0.990635	-3.40544	0.000724666	0.00713468	-1.54083
42237	-0.00566416	0.991278	-2.6565	0.00819878	0.0496442	-3.75513
33167	-0.0056584	0.986778	-4.24314	2.72e-05	0.000443755	1.54436
51826	-0.00547293	0.989392	-3.33116	0.000941939	0.00885778	-1.78372
22149	-0.00521003	0.954169	-2.68317	0.00758312	0.0467493	-3.68531
15829	-0.00512231	0.983853	-2.8299	0.00488135	0.0332362	-3.28915
17804	-0.00507068	0.991249	-2.76067	0.00602292	0.039394	-3.47859
49096	-0.00501654	0.993806	-3.15632	0.00171372	0.014482	-2.33535
58156	-0.00491278	0.993858	-2.94965	0.00336055	0.0246899	-2.95081
66652	-0.00485564	0.00467034	-2.6686	0.00791401	0.048285	-3.72352
1518	-0.00485489	0.983771	-2.80582	0.00525403	0.0353654	-3.35556
37909	-0.00483434	0.0102644	-3.52336	0.000473273	0.00500216	-1.14483
46360	-0.00478847	0.991571	-2.78309	0.00562925	0.0373834	-3.41774
89449	-0.00475489	0.993272	-2.82626	0.00493616	0.0335174	-3.29924
16634	-0.00474812	0.98661	-4.54459	7.22e-06	0.000139432	2.80659
84638	-0.00473459	0.00802273	-6.29357	7.87e-10	3.47e-08	11.6205
65153	-0.00472506	0.992442	-2.99637	0.00289536	0.0218938	-2.81518
53605	-0.0046208	0.992837	-2.70162	0.00718181	0.0449048	-3.63661
41694	-0.00458972	0.992356	-2.67549	0.00775607	0.0475412	-3.70549
52570	-0.00436717	0.992052	-4.19752	3.3e-05	0.00052614	1.36025
26693	-0.00422657	0.00723923	-3.18875	0.00153671	0.0133225	-2.23516
42238	-0.00405489	0.985629	-2.76758	0.00589907	0.0387989	-3.4599
3688	-0.00368196	0.00678541	-2.89262	0.00402067	0.0284645	-3.11363
33372	-0.0036183	0.993483	-2.90679	0.00384646	0.0276271	-3.07346
75124	-0.00360526	0.00992703	-2.97357	0.00311447	0.0232296	-2.88163
70819	-0.00342431	0.994042	-3.08285	0.00218654	0.0175142	-2.55873
69077	-0.00328421	0.996865	-2.87524	0.00424414	0.0296905	-3.16264
23739	-0.00317669	0.996626	-2.85838	0.00447164	0.0309537	-3.2099
65970	-0.00313634	0.993254	-3.25467	0.00122785	0.0110241	-2.02854
1523	-0.00299298	0.993322	-3.12421	0.00190739	0.0157623	-2.4336
60067	-0.00271203	0.996369	-2.83373	0.00482432	0.0329175	-3.27854
45208	-0.00240677	0.997113	-2.94141	0.00344944	0.0251836	-2.97455
25025	-0.00231403	0.992491	-2.75905	0.00605247	0.0394722	-3.48299
14255	-0.00194812	0.996261	-3.60396	0.000351294	0.00392176	-0.866861
78668	-0.00111754	0.000470096	-3.25845	0.001212	0.0108993	-2.01656
2708	0.00111303	0.999741	2.83317	0.00483269	0.0329646	-3.2801
37795	0.00125413	0.99925	3.06562	0.0023135	0.0183288	-2.61036
66724	0.00134787	0.999834	2.7059	0.00709166	0.0445523	-3.62528
70490	0.00150025	0.999443	3.32183	0.000973133	0.00908258	-1.81385
29617	0.00157368	0.999692	2.82852	0.00490206	0.0333364	-3.29298
43211	0.00160752	0.999634	2.67095	0.00785993	0.0480334	-3.71739
50568	0.0016391	0.999017	3.10726	0.00201754	0.0164543	-2.48506
11550	0.00165539	0.999043	3.07039	0.00227774	0.0181089	-2.59611
40606	0.00172581	0.00237895	3.22944	0.00133856	0.0118849	-2.1081
1226	0.00176892	0.997804	2.96028	0.00324911	0.0240297	-2.92014
59077	0.00178597	0.998694	3.64782	0.000298	0.0034152	-0.713111
86134	0.00192281	0.999751	3.74102	0.000208943	0.00253169	-0.380647
50775	0.00200752	0.00521627	2.80997	0.00518798	0.0349838	-3.34415
52576	0.00204536	0.00438397	3.25299	0.00123493	0.0110743	-2.03384
16778	0.00208271	0.00553014	2.71308	0.0069423	0.0438844	-3.6062
89082	0.00216993	0.999324	3.78164	0.000178571	0.00221932	-0.233271
37853	0.00221128	0.99959	4.32749	1.89e-05	0.000324129	1.8896
38189	0.00229925	0.999553	2.73564	0.00649179	0.0417066	-3.54598
67274	0.00236165	0.999381	5.53355	5.56e-08	1.71e-06	7.48777
70825	0.00237769	0.996354	3.86149	0.000130604	0.00169122	0.0607223
74090	0.00243534	0.00396148	3.90657	0.000109201	0.00145265	0.229214
54317	0.00252682	0.997517	2.70315	0.00714946	0.0447649	-3.63256
32227	0.0026584	0.00535861	2.86148	0.00442898	0.0307058	-3.20123
72713	0.00266341	0.00432656	2.93555	0.00351383	0.0255699	-2.99135
80358	0.00285639	0.994595	3.40262	0.000731962	0.00720019	-1.55012
72691	0.00288622	0.998602	4.67234	4.03e-06	8.45e-05	3.36517
14260	0.00296842	0.00775981	2.80894	0.00520438	0.0350838	-3.347
75781	0.00297293	0.0055378	2.75699	0.00608999	0.0396592	-3.48855
74652	0.00300852	0.999667	5.22149	2.81e-07	7.54e-06	5.92327
78643	0.00310276	0.999472	5.13415	4.36e-07	1.12e-05	5.49962
46494	0.00312582	0.00635215	3.49697	0.000521161	0.00543656	-1.23456
90537	0.00314361	0.994648	2.77121	0.0058349	0.0384671	-3.45005
63186	0.00318747	0.00597416	2.87949	0.00418848	0.0293652	-3.15068
48128	0.0033015	0.995536	3.15807	0.00170374	0.014414	-2.32999
34253	0.00333684	0.00596938	2.86862	0.00433219	0.0301519	-3.18123
39660	0.00335689	0.999325	3.42794	0.000668706	0.00667038	-1.46626
41149	0.00338897	0.997888	3.17468	0.00161132	0.0137829	-2.27875
23699	0.00344261	0.99846	3.30115	0.00104578	0.00963631	-1.8804
21656	0.00355764	0.999654	7.93601	1.95e-14	1.64e-12	21.9942
30360	0.00357218	0.989115	3.63057	0.000317985	0.00360191	-0.773795
39886	0.00361128	0.998058	3.01048	0.00276695	0.0211582	-2.77382
75060	0.00366191	0.00694282	3.54739	0.000433277	0.004654	-1.06256
43521	0.00369273	0.997504	3.43949	0.000641561	0.00645533	-1.42778
80909	0.00380451	0.9994	4.30607	2.07e-05	0.00034898	1.80136
36557	0.00384511	0.996312	2.67325	0.00780718	0.0477761	-3.71137
78098	0.00387293	0.998202	3.12366	0.00191084	0.0157781	-2.43526
53960	0.00401855	0.993494	4.14593	4.1e-05	0.000629283	1.15422
80161	0.00404035	0.99022	2.7668	0.00591302	0.0388451	-3.46202
66743	0.00404561	0.996367	2.69633	0.00729489	0.0454219	-3.65061
43231	0.00404962	0.00972345	3.83897	0.000142727	0.00182294	-0.0227656
49600	0.00407017	0.993948	3.18246	0.0015697	0.0135248	-2.25469
8184	0.0040787	0.994551	3.66392	0.000280423	0.00324862	-0.656247
47242	0.00408822	0.998018	2.97963	0.00305486	0.0228915	-2.86403
24336	0.00412381	0.997905	2.75905	0.00605241	0.0394722	-3.48299
1590	0.0041589	0.999665	6.52787	1.94e-10	9.43e-09	12.9835
46388	0.00422456	0.992022	2.71543	0.00689423	0.0436297	-3.59996
79734	0.00428546	0.00781172	2.97491	0.00310124	0.023154	-2.87775
50446	0.00441203	0.995433	3.43746	0.000646254	0.00648509	-1.43455
74089	0.00441804	0.998807	4.30456	2.09e-05	0.000350754	1.79512
88089	0.00443333	0.999448	5.88544	8.17e-09	2.96e-07	9.34542
82117	0.00448321	0.992558	2.73931	0.00642118	0.0414191	-3.53615
20555	0.0045	0.997701	2.80728	0.00523075	0.0352298	-3.35156
83887	0.00451378	0.00871914	3.74478	0.000205934	0.00250065	-0.367047
12307	0.00453258	0.996	3.36493	0.000836569	0.00804915	-1.67392
30489	0.00467268	0.00795502	3.1663	0.00165735	0.0141389	-2.30463
19936	0.00478772	0.999528	8.20265	2.95e-15	2.74e-13	23.8487
82099	0.0049401	0.995226	3.29224	0.00107864	0.00988625	-1.90897
23625	0.00500301	0.99947	3.72528	0.00022197	0.00265938	-0.43735
8814	0.00510376	0.994677	2.92772	0.00360176	0.0260834	-3.0138
85569	0.00519699	0.997461	4.13193	4.35e-05	0.000660467	1.09874
13122	0.00521403	0.999688	5.72154	2.02e-08	6.78e-07	8.46806
84641	0.00527945	0.00882368	4.58866	5.91e-06	0.000117021	2.9977
45686	0.00537519	0.994673	3.52475	0.000470866	0.00497906	-1.14008
75169	0.00540927	0.998058	2.8964	0.00397356	0.0282379	-3.10295
88929	0.00541303	0.995256	6.09056	2.56e-09	1.02e-07	10.4729
14167	0.00546717	0.996998	4.02694	6.71e-05	0.000962827	0.688056
23691	0.00560677	0.989826	2.86098	0.00443591	0.0307348	-3.20264
50104	0.00567544	0.00890694	3.84061	0.000141812	0.00181539	-0.0167171
47655	0.00574762	0.990865	2.70282	0.00715649	0.044784	-3.63344
10064	0.00593133	0.0141933	3.78738	0.000174631	0.00217954	-0.212326
33235	0.0060594	0.994473	2.83131	0.00486039	0.0331233	-3.28527
52787	0.00608346	0.997423	2.84686	0.00463345	0.0318868	-3.24205
21484	0.00615589	0.998929	7.51174	3.59e-13	2.56e-11	19.1373
47974	0.00617895	0.995409	4.79128	2.31e-06	5.11e-05	3.89776
32109	0.00630125	0.989825	3.5786	0.000386055	0.00424496	-0.954939
54293	0.00637845	0.0108885	3.33046	0.000944231	0.0088719	-1.78597
72694	0.00643809	0.961472	4.18487	3.48e-05	0.000549855	1.30953
2989	0.0064396	0.983868	3.21536	0.00140427	0.0123763	-2.15224
50072	0.00646992	0.998565	2.66669	0.00795836	0.0484895	-3.72852
76303	0.00657418	0.994254	3.77733	0.000181583	0.00225127	-0.248973
44192	0.00667845	0.986706	3.84321	0.00014037	0.00179898	-0.00710562
8170	0.00679073	0.988624	3.19657	0.00149667	0.013051	-2.21088
88926	0.00680526	0.996654	6.76783	4.45e-11	2.42e-09	14.4212
62650	0.00694336	0.994417	2.88768	0.00408314	0.0287886	-3.1276
35830	0.00704687	0.0130423	3.42687	0.000671274	0.00669001	-1.46981
39180	0.00735263	0.0112658	4.45618	1.07e-05	0.000197388	2.42824
53497	0.00743208	0.994115	2.69503	0.007323	0.0455218	-3.65405
50233	0.00757769	0.99007	2.6922	0.00738419	0.0457873	-3.66151
20480	0.00769023	0.991109	3.13677	0.00182937	0.0152695	-2.39529
54541	0.00775689	0.999404	6.82552	3.1e-11	1.74e-09	14.7731
1400	0.0078416	0.99469	3.28988	0.00108747	0.00994282	-1.9165
472	0.00785514	0.991198	2.78425	0.00560963	0.0372992	-3.4146
46862	0.00788546	0.0264744	3.55035	0.000428577	0.004619	-1.05239
18732	0.00791679	0.983052	2.72842	0.00663313	0.042384	-3.56532
13275	0.00801153	0.998658	2.70006	0.00721509	0.0450125	-3.64075
80160	0.00804436	0.998321	4.17864	3.57e-05	0.000561472	1.28457
62521	0.00821554	0.989879	3.36784	0.000828013	0.00798739	-1.6644
22258	0.00826817	0.995008	5.15293	3.97e-07	1.03e-05	5.59017
63051	0.00843083	0.996763	4.06579	5.72e-05	0.000834695	0.838883
20047	0.00856942	0.979027	4.87166	1.57e-06	3.59e-05	4.26442
62294	0.008598	0.0140703	2.94399	0.00342139	0.0250277	-2.96712
38171	0.00868872	0.992246	3.48114	0.000552017	0.0056844	-1.28807
2021	0.00870551	0.995326	5.56405	4.72e-08	1.47e-06	7.64491
75259	0.00875012	0.996468	5.47752	7.47e-08	2.25e-06	7.20106
61144	0.00877394	0.994222	3.64992	0.000295655	0.00339352	-0.705722
26936	0.00890902	0.993436	4.13999	4.21e-05	0.000642914	1.13069
76285	0.00897519	0.0129672	3.03631	0.00254528	0.0198007	-2.69761
55370	0.00904361	0.981485	4.59805	5.66e-06	0.000112811	3.03864
65154	0.009401	0.988321	3.20058	0.00147649	0.0129203	-2.1984
60282	0.00946441	0.983134	3.8693	0.000126632	0.00165219	0.0897814
68616	0.00948697	0.981798	3.08795	0.0021502	0.0173283	-2.54338
62164	0.00953659	0.996298	3.6683	0.000275807	0.00321173	-0.640718
39365	0.00958145	0.99682	2.95919	0.00326044	0.024086	-2.92331
8464	0.00965138	0.996113	6.38653	4.54e-10	2.08e-08	12.1564
43316	0.00968922	0.994938	3.54245	0.000441241	0.00471694	-1.07953
74845	0.00980952	0.983516	4.66966	4.08e-06	8.53e-05	3.3533
61882	0.00984712	0.985568	2.93552	0.00351423	0.0255699	-2.99145
43322	0.00994712	0.994284	3.53682	0.000450463	0.00480866	-1.09881
9791	0.0100178	0.989631	3.8683	0.000127135	0.00165668	0.0860522
47589	0.010186	0.992549	3.26737	0.00117539	0.0106168	-1.98826
32854	0.010295	0.994311	5.87248	8.78e-09	3.16e-07	9.27532
74081	0.0103341	0.976417	6.30073	7.54e-10	3.36e-08	11.6616
48437	0.0103945	0.995201	3.70864	0.000236569	0.00280284	-0.497038
36550	0.0104614	0.975723	2.68537	0.00753418	0.0465244	-3.67951
62494	0.0105496	0.971949	3.47822	0.000557884	0.00572642	-1.2979
79583	0.0106351	0.98141	2.74624	0.00628941	0.0407097	-3.51752
22010	0.0108812	0.978192	4.25435	2.59e-05	0.000425761	1.5899
75790	0.0109689	0.989197	4.68077	3.87e-06	8.15e-05	3.40254
16068	0.0110023	0.995623	3.93453	9.76e-05	0.00131762	0.334656
54734	0.0110504	0.0331744	3.11933	0.00193849	0.0159547	-2.44843
77149	0.0110842	0.959917	3.12346	0.00191212	0.0157781	-2.43587
76769	0.01111	0.986579	3.28779	0.00109535	0.0100068	-1.92317
74095	0.0111105	0.0140423	4.98645	9.04e-07	2.17e-05	4.79753
80166	0.0111772	0.0181849	2.7662	0.00592367	0.0388809	-3.46364
43456	0.0112336	0.997839	5.67466	2.61e-08	8.55e-07	8.22096
19777	0.0113436	0.998633	3.41265	0.000706268	0.00699388	-1.51697
16857	0.0114464	0.972516	2.76645	0.00591917	0.0388627	-3.46296
76987	0.0117639	0.990982	3.95731	8.91e-05	0.00122509	0.421058
22365	0.0118105	0.0385474	2.87301	0.00427365	0.0298503	-3.16891
20313	0.0119	0.992075	2.9977	0.00288301	0.0218225	-2.81129
89061	0.0119845	0.992761	3.17912	0.00158743	0.0136357	-2.26502
26934	0.0119962	0.986388	3.51074	0.00049563	0.00519681	-1.18781
85574	0.0120085	0.982915	3.00616	0.00280568	0.021338	-2.7865
53295	0.0120444	0.996765	4.96172	1.02e-06	2.41e-05	4.68176
46955	0.0120531	0.0272737	2.70604	0.00708872	0.04455	-3.62491
26852	0.0121644	0.0225325	4.08952	5.19e-05	0.00076869	0.93168
50602	0.0123218	0.0326722	4.08088	5.38e-05	0.000791977	0.897838
52944	0.0125383	0.979811	2.9996	0.00286551	0.0217268	-2.80574
90167	0.0127226	0.989513	4.54833	7.1e-06	0.000137625	2.82278
85601	0.0127501	0.0232548	3.43245	0.000657973	0.00657915	-1.45123
81014	0.0128902	0.975915	2.67708	0.00771979	0.0473965	-3.7013
20849	0.0132464	0.997107	3.84546	0.000139129	0.00178409	0.00124758
68055	0.0133424	0.0234096	3.94933	9.2e-05	0.0012614	0.390734
57139	0.0135231	0.0274505	2.72196	0.00676181	0.0430224	-3.58256
7777	0.0135937	0.981123	5.11637	4.76e-07	1.21e-05	5.41415
31662	0.0137862	0.986665	3.01476	0.00272905	0.0209327	-2.76124
36040	0.0138922	0.0369871	4.87973	1.52e-06	3.47e-05	4.30158
45269	0.0139887	0.990032	5.5885	4.14e-08	1.31e-06	7.7714
12706	0.0140253	0.98894	3.66767	0.000276473	0.00321615	-0.642973
74133	0.0141875	0.930143	2.70771	0.00705364	0.0443756	-3.62046
47583	0.0144371	0.0238388	3.5731	0.000394012	0.00430858	-0.973972
26732	0.0144416	0.0357904	2.74773	0.00626147	0.040596	-3.51352
36008	0.0145712	0.989498	4.1488	4.05e-05	0.000623462	1.16562
23405	0.0150757	0.985527	2.80758	0.00522592	0.0352079	-3.35072
58855	0.0151128	0.973473	3.32867	0.000950172	0.00891278	-1.79177
37283	0.0151426	0.977781	3.0807	0.00220202	0.0176076	-2.56518
51485	0.015217	0.996146	4.04984	6.11e-05	0.00088423	0.776807
33126	0.0152221	0.0261775	3.55081	0.000427863	0.00461351	-1.05084
77431	0.0153321	0.997793	7.41896	6.68e-13	4.64e-11	18.5283
56781	0.0154195	0.037445	3.5578	0.000416962	0.00451333	-1.02677
8581	0.0154596	0.986352	3.27365	0.00115021	0.0104314	-1.96828
66373	0.0155013	0.0349177	2.88992	0.00405473	0.0286514	-3.12128
19306	0.0155326	0.0250266	2.95082	0.00334818	0.0246206	-2.94746
28044	0.0156556	0.978328	3.26677	0.00117779	0.0106257	-1.99015
60261	0.0156772	0.995838	12.2399	1.22e-29	6.66e-27	56.5276
15932	0.0156915	0.951236	2.69602	0.00730161	0.0454512	-3.65143
69229	0.0157561	0.984456	3.59179	0.000367599	0.00407665	-0.909219
70107	0.0158023	0.985926	7.08929	5.8e-12	3.62e-10	16.412
22747	0.0158554	0.979845	3.14631	0.00177208	0.0148855	-2.36609
46954	0.0158704	0.0308596	2.6873	0.00749147	0.0462989	-3.67442
61326	0.0165138	0.0309316	4.20673	3.17e-05	0.000508902	1.39725
17122	0.0165957	0.976947	2.90618	0.00385386	0.027659	-3.07521
48191	0.0170409	0.02914	3.53583	0.000452104	0.00482159	-1.1022
67700	0.0171494	0.973501	4.32139	1.94e-05	0.000330547	1.86443
63190	0.0172677	0.975156	3.09183	0.00212292	0.0171836	-2.5317
59183	0.0172917	0.978595	5.29213	1.96e-07	5.44e-06	6.2705
85468	0.0173343	0.0448306	2.98764	0.00297754	0.0223869	-2.84068
38871	0.0174416	0.0208014	3.90331	0.000110627	0.00146813	0.216992
65416	0.017483	0.994762	9.00003	8.08e-18	1.04e-15	29.6515
49282	0.0175388	0.937594	3.8393	0.000142543	0.00182163	-0.0215537
46435	0.0177333	0.0248904	4.18742	3.44e-05	0.000546388	1.31973
33137	0.0177381	0.0405792	2.837	0.0047762	0.0326588	-3.26948
86237	0.0180323	0.0266074	3.32801	0.000952358	0.00892582	-1.7939
85625	0.0181015	0.968126	3.16398	0.00167031	0.0142062	-2.31179
26522	0.0181213	0.982924	2.86451	0.00438776	0.0304954	-3.19277
54385	0.0181689	0.953422	2.6546	0.00824423	0.0498253	-3.76007
71118	0.0182108	0.981725	3.72857	0.000219186	0.00262743	-0.42552
85646	0.018297	0.0363232	4.00337	7.39e-05	0.00104337	0.597202
192	0.0183068	0.979764	3.33555	0.000927569	0.00874832	-1.7695
32155	0.0183263	0.0306512	4.29367	2.19e-05	0.000366001	1.75041
28617	0.0183496	0.934431	3.00855	0.00278416	0.0212464	-2.77948
83760	0.0183802	0.960413	2.78612	0.00557784	0.0371326	-3.40948
38768	0.018398	0.911978	3.46988	0.000575001	0.0058813	-1.326
43303	0.0185328	0.0345378	2.85776	0.00448033	0.0309765	-3.21166
69733	0.0188612	0.0600775	2.83506	0.00480475	0.0328146	-3.27486
86503	0.0188679	0.961716	3.82654	0.000149871	0.00190335	-0.0686815
48613	0.0188769	0.964787	3.47043	0.000573855	0.00587422	-1.32415
8572	0.0189662	0.979994	3.53334	0.000456269	0.00485999	-1.11074
68684	0.0190316	0.981151	4.00662	7.3e-05	0.00103226	0.609685
42121	0.0191195	0.0369663	2.78063	0.00567136	0.0375674	-3.42446
65526	0.0191271	0.981042	2.77067	0.00584448	0.0384964	-3.45153
32783	0.0194446	0.026645	2.85703	0.00449035	0.0310293	-3.21368
44161	0.0196456	0.0371421	2.83074	0.0048688	0.0331706	-3.28683
62843	0.0200138	0.0331988	2.88191	0.00415704	0.0291968	-3.14386
16951	0.0201424	0.9578	3.22489	0.00135946	0.0120418	-2.12237
33225	0.0202033	0.0376586	2.65442	0.00824869	0.0498388	-3.76055
64113	0.0202323	0.981276	2.9992	0.00286919	0.0217305	-2.80691
20046	0.0202343	0.039762	2.70505	0.00710944	0.0446265	-3.62753
14156	0.0202406	0.0289258	2.97508	0.00309951	0.0231488	-2.87724
25206	0.0202885	0.975635	6.36649	5.11e-10	2.33e-08	12.0404
81174	0.0204471	0.962218	2.73881	0.00643061	0.041468	-3.53747
50975	0.020505	0.0343151	2.65506	0.00823333	0.0497862	-3.75888
46383	0.0206343	0.959617	4.24293	2.72e-05	0.000443816	1.54354
47470	0.0208311	0.108795	4.35407	1.68e-05	0.000292282	1.99968
80613	0.02089	0.0603773	3.45081	0.000615977	0.00623111	-1.38998
21947	0.0209053	0.99905	4.69019	3.71e-06	7.83e-05	3.44436
18130	0.0209356	0.968179	3.4105	0.000711693	0.00703476	-1.52407
44727	0.0209574	0.993057	6.30019	7.56e-10	3.36e-08	11.6585
78569	0.0210805	0.972764	3.41388	0.00070316	0.00697123	-1.51288
54101	0.0212574	0.0834911	3.02498	0.00264036	0.0203708	-2.7311
27571	0.0212604	0.99562	4.62317	5.05e-06	0.000102191	3.14854
74647	0.0214544	0.976716	3.49423	0.000526387	0.00547579	-1.24384
40884	0.0215581	0.992657	4.98044	9.31e-07	2.23e-05	4.76932
11004	0.021619	0.983836	2.72927	0.00661636	0.042313	-3.56305
36120	0.0216323	0.997444	3.93998	9.55e-05	0.00129848	0.35528
841	0.0219075	0.987933	6.4729	2.71e-10	1.28e-08	12.66
34264	0.0221188	0.0445713	3.81366	0.00015762	0.00198569	-0.116057
87670	0.0225536	0.971581	3.18169	0.00157378	0.0135496	-2.25708
18136	0.0226499	0.978405	3.33991	0.00091349	0.00865558	-1.75535
32085	0.0227426	0.0449141	2.68751	0.00748694	0.0462964	-3.67388
70619	0.0228591	0.994267	8.62719	1.33e-16	1.48e-14	26.8916
57629	0.0229622	0.971729	3.18898	0.00153551	0.0133173	-2.23445
40493	0.0233561	0.963994	4.25041	2.64e-05	0.000431731	1.5739
79614	0.0234241	0.992949	4.62121	5.09e-06	0.000103021	3.13995
49719	0.0237449	0.965066	4.22876	2.89e-05	0.000468754	1.48614
17216	0.0237714	0.0470699	2.84628	0.00464182	0.0319346	-3.24368
73843	0.0238591	0.977822	4.13283	4.33e-05	0.000658429	1.10231
58502	0.0239719	0.974877	5.8309	1.11e-08	3.88e-07	9.05113
73706	0.0240155	0.0642871	3.7807	0.000179222	0.00222569	-0.23669
47437	0.0240185	0.138316	3.85823	0.000132297	0.00171017	0.0486077
19966	0.0241243	0.0538593	4.31704	1.98e-05	0.000335316	1.84649
16396	0.0242326	0.0540469	3.35365	0.000870478	0.00831123	-1.71071
49465	0.0243782	0.964744	2.69324	0.00736165	0.0457009	-3.65877
85069	0.0244652	0.948958	3.01148	0.00275801	0.0211043	-2.77087
3931	0.0245093	0.946769	2.67378	0.00779488	0.0477453	-3.70996
14751	0.0245792	0.954341	3.02535	0.00263726	0.0203609	-2.73002
22502	0.0246657	0.0670603	4.34215	1.77e-05	0.000306688	1.95023
70304	0.024784	0.0351364	5.1731	3.58e-07	9.39e-06	5.68778
74104	0.0250481	0.943494	2.65635	0.00820225	0.0496518	-3.7555
78961	0.0256175	0.957711	2.89818	0.00395146	0.0281344	-3.09789
20739	0.0258088	0.952967	2.77485	0.0057711	0.0381474	-3.44015
11	0.0260501	0.973777	4.17576	3.62e-05	0.000567126	1.27308
75787	0.0260752	0.951237	3.19821	0.00148839	0.0130034	-2.20578
59610	0.0261614	0.0315459	4.06938	5.64e-05	0.000824431	0.852888
65108	0.0261905	0.0650105	3.18727	0.0015444	0.0133616	-2.23976
62894	0.0262216	0.962467	3.56698	0.000403048	0.0043924	-0.995124
8225	0.0262336	0.0576043	2.69229	0.00738233	0.0457873	-3.66128
59223	0.0264206	0.0697775	3.59053	0.000369315	0.00408522	-0.913568
17232	0.0265095	0.983952	4.08917	5.2e-05	0.000769322	0.930278
14474	0.0265424	0.941525	2.97648	0.00308572	0.0230807	-2.87318
76743	0.0267872	0.971738	2.80155	0.00532271	0.0357525	-3.36728
80902	0.0268045	0.0404545	3.54837	0.000431722	0.00463951	-1.05921
42045	0.027008	0.951612	3.82527	0.00015062	0.00191069	-0.0733647
39143	0.0270825	0.0457251	3.64572	0.000300371	0.00343535	-0.720521
74068	0.027089	0.9272	3.28764	0.00109593	0.010008	-1.92366
19493	0.0271206	0.954046	2.8843	0.00412635	0.0290021	-3.13714
73849	0.0271401	0.975828	3.4932	0.000528362	0.00549124	-1.24733
61611	0.027399	0.0459062	2.8804	0.00417662	0.0293095	-3.14811
15855	0.0276351	0.0718684	3.59394	0.000364668	0.00404889	-0.901746
43317	0.0276378	0.0357816	3.7185	0.000227815	0.00271852	-0.46171
46586	0.0276401	0.917831	3.39894	0.000741622	0.00726336	-1.56228
29975	0.027783	0.0277201	3.52199	0.000475651	0.00501312	-1.1495
33220	0.0280862	0.967694	4.93398	1.17e-06	2.73e-05	4.55248
85800	0.0284311	0.951918	3.61074	0.000342502	0.00383315	-0.84319
47835	0.0284338	0.0749098	3.52737	0.00046636	0.00494306	-1.13112
46443	0.0284351	0.0982689	3.12804	0.00188324	0.0156203	-2.42192
47867	0.0284872	0.0518608	3.28449	0.00110794	0.0101094	-1.93372
36074	0.0288459	0.0691663	3.85771	0.00013257	0.00171177	0.0466695
180	0.0288827	0.947354	3.09181	0.00212305	0.0171836	-2.53175
73577	0.0289461	0.0612462	3.02562	0.00263496	0.0203572	-2.72923
24569	0.0294461	0.959113	5.28093	2.07e-07	5.72e-06	6.21516
36342	0.0294481	0.935594	2.96664	0.00318401	0.0236304	-2.90173
46271	0.0296607	0.927507	2.90525	0.00386503	0.027721	-3.07783
48	0.0297549	0.0587287	2.94089	0.00345509	0.0252166	-2.97603
52810	0.0299088	0.941955	3.33974	0.000914063	0.00865735	-1.75593
65960	0.0299541	0.938382	3.91508	0.000105552	0.00141303	0.261235
42587	0.0301123	0.964638	4.41816	1.27e-05	0.000227815	2.2676
62023	0.0301985	0.967378	5.01672	7.8e-07	1.89e-05	4.93994
20715	0.0303388	0.986733	7.31427	1.34e-12	8.8e-11	17.8482
4277	0.0304689	0.948821	3.57887	0.000385677	0.00424434	-0.954024
1006	0.0305539	0.103733	2.69223	0.0073836	0.0457873	-3.66143
82785	0.0306581	0.879612	3.20519	0.0014536	0.0127499	-2.18402
67860	0.0307772	0.991883	3.39613	0.000749072	0.00732993	-1.57155
49046	0.030804	0.0774354	3.39008	0.000765332	0.00745327	-1.59146
26756	0.0308539	0.0643304	2.67114	0.0078554	0.0480188	-3.71687
24866	0.0309825	0.701279	2.71879	0.00682566	0.0433136	-3.591
65141	0.0311479	0.0441636	2.93422	0.00352867	0.0256203	-2.99518
53146	0.0314476	0.103781	3.12358	0.00191139	0.0157781	-2.43552
17073	0.0315842	0.071538	3.77171	0.000185583	0.00229579	-0.269426
86077	0.0316707	0.0824995	3.1923	0.00151839	0.0132148	-2.22414
85603	0.031698	0.0682361	3.07384	0.00225211	0.0179242	-2.58576
56772	0.031884	0.981366	5.32787	1.63e-07	4.58e-06	6.44773
52616	0.031885	0.0802672	3.14599	0.00177393	0.0148955	-2.36705
74584	0.0320386	0.97864	7.6829	1.12e-13	8.51e-12	20.2757
35524	0.0324516	0.0445292	2.69634	0.00729475	0.0454219	-3.65059
13004	0.0325183	0.11493	2.94586	0.00340122	0.0249208	-2.96175
49758	0.0325356	0.974541	4.668	4.11e-06	8.58e-05	3.34599
84308	0.032685	0.0732414	2.92008	0.00368941	0.0266322	-3.03563
90494	0.0327972	0.135528	2.68233	0.00760193	0.0468509	-3.68753
48337	0.0328737	0.989048	3.02887	0.00260737	0.0201732	-2.71962
88997	0.0329506	0.065616	2.98479	0.00300478	0.0225691	-2.84898
31899	0.0331015	0.912692	3.15694	0.00171019	0.0144577	-2.33346
81282	0.0331083	0.932956	3.78533	0.000176029	0.00219454	-0.21981
46445	0.0332271	0.106011	3.16596	0.00165927	0.0141499	-2.3057
47540	0.0332764	0.932901	2.78761	0.00555274	0.0369875	-3.40541
30286	0.0333168	0.061034	2.84532	0.00465553	0.0320093	-3.24635
78701	0.0334296	0.842678	2.78863	0.0055356	0.0369062	-3.40263
16871	0.0334682	0.105989	2.97999	0.00305128	0.02288	-2.86297
77295	0.0334977	0.942991	3.58481	0.000377261	0.00415989	-0.933436
56134	0.0335827	0.0425562	2.87219	0.00428448	0.0299167	-3.1712
2170	0.0338138	0.96945	6.79222	3.82e-11	2.1e-09	14.5697
26820	0.0338747	0.936645	2.99306	0.00292625	0.0220753	-2.82485
38679	0.0339707	0.89689	2.79772	0.00538509	0.0360743	-3.37778
10627	0.0343378	0.983461	2.66542	0.00798808	0.0486442	-3.73185
83868	0.0344353	0.909839	3.66153	0.00028297	0.00327474	-0.664707
57627	0.0347842	0.0588189	3.25209	0.00123875	0.0111042	-2.03669
61665	0.0351045	0.18324	3.39174	0.000760832	0.00741753	-1.58599
82332	0.0354664	0.0898701	3.30637	0.00102699	0.00949827	-1.86364
43855	0.0354892	0.0387234	3.8679	0.000127336	0.00165751	0.0845683
8026	0.0355421	0.0692055	2.6547	0.00824198	0.0498251	-3.75982
39030	0.035793	0.0588134	4.00221	7.43e-05	0.00104637	0.592709
87224	0.0358246	0.843107	3.36176	0.000845965	0.00811297	-1.68427
31844	0.0358486	0.928014	4.39367	1.42e-05	0.000250379	2.1648
82077	0.0360835	0.919422	3.66731	0.000276842	0.00321711	-0.644223
8590	0.0361223	0.972291	4.08567	5.27e-05	0.000779985	0.916568
25568	0.0362243	0.957899	4.00855	7.24e-05	0.00102613	0.617123
62802	0.0362779	0.989845	9.79186	1.63e-20	2.77e-18	35.767
33348	0.0366586	0.967019	4.66418	4.18e-06	8.72e-05	3.32908
26496	0.0368273	0.0501481	3.35135	0.000877532	0.00837145	-1.71818
55098	0.0369717	0.0494911	2.85165	0.00456555	0.0314775	-3.2287
52104	0.0369895	0.112129	4.35463	1.68e-05	0.000291992	2.00201
29496	0.0370699	0.868585	3.08666	0.00215929	0.0173595	-2.54725
1863	0.0374013	0.989191	4.60155	5.57e-06	0.000111393	3.05391
35833	0.037418	0.932501	2.95385	0.00331616	0.0244012	-2.93872
94992	0.0375283	0.0810383	3.32116	0.000975422	0.00909259	-1.81602
59017	0.0375406	0.825071	3.02796	0.00261503	0.0202102	-2.7223
24740	0.0376226	0.153328	3.73326	0.000215273	0.00259226	-0.408629
38915	0.0377424	0.0750531	2.9613	0.00323857	0.0239639	-2.91719
83179	0.0378662	0.939198	3.67809	0.000265759	0.00310278	-0.605988
53045	0.0379629	0.882853	3.69021	0.000253799	0.0029771	-0.562881
1893	0.0381541	0.922399	4.18706	3.45e-05	0.000546841	1.31828
63206	0.038214	0.966751	4.0766	5.47e-05	0.000802951	0.881103
64392	0.0383201	0.193536	2.78133	0.0056593	0.0375412	-3.42254
72302	0.0383486	0.969616	3.88972	0.000116781	0.00153977	0.166016
4055	0.0384601	0.0488435	2.85423	0.00452941	0.0312571	-3.22151
22754	0.0385892	0.946214	3.34804	0.000887801	0.00844786	-1.72895
29520	0.0386113	0.961614	2.75854	0.00606166	0.0395206	-3.48436
86199	0.0388266	0.0789617	2.88497	0.00411764	0.0289772	-3.13523
68263	0.0389331	0.966363	4.36794	1.58e-05	0.000277024	2.05735
25533	0.0390175	0.982791	11.3216	4.31e-26	1.51e-23	48.4486
19762	0.0393048	0.983023	7.14008	4.18e-12	2.63e-10	16.7332
85691	0.0393261	0.945296	5.77106	1.54e-08	5.27e-07	8.7309
41025	0.0393278	0.0702297	2.65529	0.00822786	0.0497666	-3.75829
85602	0.0393414	0.0729163	3.3819	0.000787857	0.00762956	-1.61834
45442	0.0395802	0.944086	5.42793	9.7e-08	2.85e-06	6.94941
57817	0.0396897	0.905401	3.21374	0.00141201	0.0124337	-2.1573
10667	0.0399479	0.971048	2.71479	0.00690729	0.0437001	-3.60166
1804	0.0400208	0.10976	2.73128	0.00657681	0.0421562	-3.55766
47556	0.0400586	0.165585	2.93636	0.00350485	0.0255299	-2.98903
76864	0.0400805	0.965417	4.40635	1.34e-05	0.000238097	2.21797
90700	0.0405208	0.991747	4.51207	8.36e-06	0.000158119	2.66665
75007	0.0409	0.190762	2.7761	0.00574951	0.0380159	-3.43678
17172	0.0410341	0.863479	4.52492	7.89e-06	0.00015007	2.72185
8871	0.0411474	0.950867	4.09636	5.04e-05	0.000749172	0.95852
62042	0.0411805	0.112724	2.71244	0.00695547	0.0439305	-3.6079
16601	0.0412095	0.842542	3.11396	0.0019733	0.0161763	-2.46474
61750	0.0412278	0.959754	5.66986	2.67e-08	8.75e-07	8.19575
63199	0.0413028	0.945083	4.41227	1.3e-05	0.000232703	2.24283
28722	0.0413471	0.889589	3.08497	0.00217137	0.0174362	-2.55235
74844	0.0413514	0.881398	5.12274	4.61e-07	1.18e-05	5.44474
67760	0.0415975	0.888665	3.23709	0.00130403	0.0116382	-2.08403
13753	0.0416561	0.0902522	2.71685	0.00686513	0.0434824	-3.59617
62272	0.0417789	0.944127	4.33734	1.81e-05	0.000311976	1.93031
2020	0.0418316	0.116462	3.78773	0.000174397	0.00217783	-0.211065
61066	0.0422238	0.0523098	3.02314	0.00265614	0.0204644	-2.73653
16758	0.0422682	0.0687206	2.77408	0.00578457	0.0382139	-3.44225
75761	0.0424055	0.0705464	3.42426	0.000677575	0.00674507	-1.47848
48249	0.0424516	0.986254	3.48265	0.000549	0.00566114	-1.28297
70290	0.0425311	0.990961	5.04055	6.93e-07	1.71e-05	5.05258
38968	0.0428679	0.137025	3.02024	0.00268113	0.0206428	-2.74508
36252	0.0429231	0.945235	3.37614	0.000804093	0.00778007	-1.63725
20967	0.0429243	0.963947	3.35422	0.000868713	0.00829791	-1.70883
7776	0.0430291	0.110763	2.91845	0.00370833	0.0267336	-3.04028
87217	0.043211	0.991657	5.82597	1.14e-08	3.96e-07	9.02467
90585	0.043306	0.116617	3.31881	0.000983446	0.00914079	-1.8236
19987	0.0433586	0.0850036	3.28184	0.00111815	0.0101901	-1.94219
28511	0.043408	0.938277	3.58876	0.00037176	0.00410326	-0.919725
60833	0.0434356	0.0745718	2.91835	0.00370943	0.0267336	-3.04055
44797	0.0434845	0.981413	6.22691	1.16e-09	5e-08	11.2403
29491	0.0435484	0.0934005	3.30859	0.00101909	0.00943692	-1.85651
86052	0.0435586	0.831263	2.87492	0.00424838	0.0296968	-3.16354
85573	0.0436639	0.907669	3.6098	0.000343719	0.00384406	-0.846501
62464	0.0437296	0.0572313	2.74324	0.00634619	0.0409943	-3.5256
56816	0.0438118	0.986362	7.70298	9.79e-14	7.44e-12	20.4105
85600	0.0439251	0.125113	3.41169	0.000708676	0.00701111	-1.52013
49324	0.0439348	0.873596	2.7188	0.00682548	0.0433136	-3.59097
81328	0.0440256	0.0968876	2.78061	0.00567163	0.0375674	-3.4245
43129	0.0441243	0.904598	3.82593	0.000150227	0.00190679	-0.0709123
49039	0.0444797	0.107789	3.37203	0.000815846	0.0078768	-1.65069
30047	0.0446331	0.0652938	2.88439	0.0041252	0.0290021	-3.13689
77092	0.0446456	0.916606	3.94922	9.2e-05	0.0012614	0.390332
73622	0.0448581	0.134872	3.08393	0.0021788	0.0174647	-2.55548
62792	0.0449534	0.971857	5.96792	5.14e-09	1.94e-07	9.7949
17534	0.045212	0.990525	3.73306	0.000215439	0.00259226	-0.409354
17050	0.0453206	0.985524	3.54651	0.000434685	0.00466465	-1.06558
16762	0.0453657	0.990672	2.81478	0.0051124	0.034526	-3.33091
10071	0.0454253	0.0898921	3.25142	0.0012416	0.0111208	-2.03881
16408	0.0455213	0.110257	2.88916	0.00406434	0.0287012	-3.12342
89371	0.045682	0.165632	2.71972	0.00680697	0.0432729	-3.58854
486	0.0457125	0.456608	2.73644	0.00647637	0.0416553	-3.54384
44088	0.0457338	0.840581	2.86931	0.00432292	0.0301194	-3.17929
61528	0.045796	0.95722	3.1103	0.00199736	0.0163254	-2.47585
18185	0.0459085	0.110748	2.70462	0.00711844	0.044658	-3.62866
89630	0.045915	0.98367	3.47991	0.000554483	0.00570194	-1.29222
53729	0.0459576	0.955969	7.40929	7.12e-13	4.93e-11	18.4652
87163	0.0460183	0.988579	2.74995	0.00621997	0.0403767	-3.50754
68249	0.0462105	0.933789	3.00958	0.00277492	0.0211998	-2.77645
9103	0.0462727	0.950775	4.80897	2.12e-06	4.73e-05	3.97799
43864	0.046285	0.179781	2.95468	0.00330744	0.024353	-2.93633
65034	0.046599	0.0836493	3.55435	0.000422297	0.00456448	-1.03863
40023	0.0466511	0.989104	4.88934	1.45e-06	3.32e-05	4.34581
25032	0.0467516	0.582384	3.02416	0.00264743	0.0204113	-2.73354
83513	0.0467599	0.139324	3.16178	0.0016827	0.0142683	-2.31857
39078	0.0468085	0.772497	2.93083	0.00356663	0.0258457	-3.0049
36828	0.0471216	0.879395	2.86273	0.00441196	0.0306162	-3.19774
67242	0.0471286	0.0967179	3.06487	0.00231917	0.0183666	-2.6126
13652	0.0472105	0.137765	3.69578	0.000248467	0.00292219	-0.542997
88387	0.0472792	0.967588	2.71063	0.00699302	0.0440808	-3.61272
21832	0.047584	0.945716	4.58307	6.06e-06	0.000119613	2.9734
63641	0.0476506	0.991879	2.94851	0.00337275	0.0247445	-2.95411
16777	0.0476847	0.991333	2.90209	0.00390353	0.0278905	-3.08682
82055	0.0478088	0.242725	4.16313	3.82e-05	0.000593975	1.22264
84732	0.048	0.91215	3.02514	0.00263903	0.0203676	-2.73064
54889	0.0480003	0.962545	6.08418	2.65e-09	1.06e-07	10.4374
16916	0.048518	0.191455	3.17652	0.0016014	0.0137189	-2.27307
60179	0.0486637	0.111925	2.87154	0.00429313	0.0299646	-3.17303
10329	0.0486875	0.93438	2.70779	0.00705191	0.0443756	-3.62024
24542	0.0487316	0.53499	2.87	0.00431369	0.0300832	-3.17736
55136	0.0489639	0.943038	3.94452	9.38e-05	0.00127965	0.372488
1297	0.0490399	0.994179	3.04979	0.00243616	0.0191211	-2.65759
32942	0.0490744	0.943296	5.57484	4.46e-08	1.39e-06	7.70066
86804	0.0490812	0.91985	3.0411	0.00250599	0.0195561	-2.6834
44151	0.0490822	0.928299	3.15013	0.00174959	0.0147296	-2.35437
53917	0.0490912	0.084144	3.11396	0.00197335	0.0161763	-2.46477
1296	0.0491677	0.992464	2.94946	0.00336258	0.0246899	-2.95136
7944	0.049184	0.848101	3.36835	0.000826537	0.00797658	-1.66275
79038	0.0493198	0.943815	8.34126	1.09e-15	1.07e-13	24.8302
54289	0.0493486	0.988969	9.82257	1.27e-20	2.21e-18	36.0108
65752	0.0495206	0.976212	9.32715	6.48e-19	9.5e-17	32.1373
17115	0.0497055	0.085462	2.69795	0.00726003	0.0452506	-3.64631
87294	0.049786	0.950923	5.11241	4.86e-07	1.23e-05	5.39512
17737	0.0498241	0.135996	3.20553	0.00145192	0.0127456	-2.18295
43338	0.0498474	0.0714132	2.83862	0.00475244	0.0325359	-3.26497
55033	0.0499426	0.994978	3.11306	0.0019792	0.0161947	-2.46748
25024	0.0500311	0.0812464	5.25582	2.36e-07	6.44e-06	6.09148
19316	0.0500965	0.995188	3.12252	0.00191814	0.015822	-2.43875
82355	0.0502361	0.966842	6.68662	7.36e-11	3.84e-09	13.9299
83237	0.0503466	0.915027	2.86291	0.00440953	0.0306088	-3.19725
68608	0.0505855	0.0832809	2.82909	0.00489353	0.0332885	-3.2914
64524	0.0505867	0.886972	3.41263	0.000706311	0.00699388	-1.51703
57862	0.0507571	0.911866	3.07911	0.00221356	0.0176766	-2.56997
56747	0.0508326	0.988975	4.00155	7.45e-05	0.0010485	0.590195
48000	0.0508985	0.094227	2.83419	0.00481757	0.0328814	-3.27727
31232	0.0510065	0.79523	2.90506	0.00386737	0.027721	-3.07838
36150	0.051008	0.808479	3.58889	0.00037158	0.00410326	-0.919275
1086	0.0510734	0.986147	2.76008	0.00603367	0.0394097	-3.48019
10860	0.0510779	0.898388	3.84906	0.000137172	0.00176304	0.0145666
26858	0.0511717	0.97383	2.9664	0.00318648	0.023634	-2.90243
48492	0.0512754	0.848734	3.96141	8.76e-05	0.00120646	0.436673
47460	0.0513524	0.840781	2.72472	0.00670659	0.0427559	-3.5752
39890	0.0514203	0.981983	8.60554	1.57e-16	1.71e-14	26.7338
245	0.0514409	0.950634	3.12148	0.00192477	0.0158592	-2.44192
71426	0.0515216	0.842122	6.18699	1.47e-09	6.16e-08	11.0141
58475	0.0516018	0.897204	3.9838	8e-05	0.0011171	0.52211
85604	0.0516757	0.0898426	3.73871	0.00021081	0.00254881	-0.388988
76089	0.0517341	0.99254	3.16467	0.00166644	0.0141894	-2.30966
66429	0.0517679	0.99231	4.60275	5.54e-06	0.000110907	3.05916
45329	0.0518373	0.966523	3.27346	0.00115098	0.0104342	-1.9689
41023	0.0519546	0.135309	3.5979	0.000359328	0.00400348	-0.887975
3267	0.0520095	0.0956665	3.04984	0.00243574	0.0191211	-2.65743
22959	0.0520429	0.289214	2.704	0.0071316	0.044703	-3.63032
82333	0.0521717	0.151516	3.48437	0.000545576	0.0056336	-1.27716
82336	0.0522108	0.118053	4.10293	4.91e-05	0.000731923	0.984331
35942	0.0522283	0.57046	3.13735	0.00182583	0.0152513	-2.39352
15770	0.052481	0.203474	3.45933	0.000597337	0.00607853	-1.36143
81868	0.0524892	0.94454	2.6779	0.00770126	0.0473086	-3.69915
45174	0.0526316	0.997608	4.69946	3.55e-06	7.55e-05	3.48556
17056	0.0526316	0.997608	4.69946	3.55e-06	7.55e-05	3.48556
54072	0.0528218	0.971473	8.41818	6.21e-16	6.24e-14	25.3799
7941	0.0528907	0.901223	4.14615	4.1e-05	0.000629125	1.15511
27913	0.0530165	0.263086	3.06404	0.00232554	0.0183976	-2.61511
45166	0.0531221	0.771507	2.69577	0.00730704	0.0454597	-3.6521
40945	0.0531917	0.0614897	3.09129	0.00212671	0.017207	-2.53333
69337	0.0532639	0.941211	3.16426	0.00166872	0.0141982	-2.31091
87149	0.0533018	0.958679	5.66175	2.79e-08	9.11e-07	8.1532
60999	0.0533734	0.986621	2.66701	0.00795107	0.0484846	-3.7277
13542	0.0534865	0.109376	3.30065	0.00104762	0.00964928	-1.88202
88435	0.053503	0.988718	3.33757	0.000921032	0.00870498	-1.76296
76257	0.0535073	0.128396	4.1544	3.96e-05	0.000612326	1.18791
46558	0.0535088	0.156687	2.71719	0.00685834	0.0434639	-3.59528
33866	0.054016	0.0756713	2.80175	0.00531951	0.0357525	-3.36673
48069	0.0543649	0.72292	2.70601	0.00708931	0.04455	-3.62499
1301	0.0544449	0.981596	4.16186	3.84e-05	0.000596313	1.21761
62977	0.054487	0.615094	3.54458	0.000437793	0.00468679	-1.07222
68159	0.0545867	0.854553	3.16247	0.00167878	0.0142458	-2.31643
58646	0.0546704	0.208033	2.69472	0.00732972	0.045545	-3.65487
8311	0.0551624	0.827723	3.18097	0.00157756	0.0135717	-2.25928
32956	0.0552617	0.997308	4.92845	1.2e-06	2.8e-05	4.5268
9631	0.055294	0.86266	2.81813	0.00506038	0.0342366	-3.32168
82082	0.0554208	0.167681	2.96939	0.00315623	0.0234667	-2.89375
10228	0.0555466	0.870753	4.30709	2.07e-05	0.000347979	1.80552
40478	0.0555469	0.956627	7.02039	9.03e-12	5.45e-10	15.9792
19112	0.0556261	0.103166	3.38534	0.000778322	0.00754537	-1.60706
14208	0.0556474	0.0973074	3.18792	0.00154103	0.0133496	-2.23775
59505	0.0558223	0.0909007	3.05215	0.00241749	0.0189998	-2.65056
60430	0.0558479	0.77592	3.01297	0.00274481	0.0210248	-2.76649
81003	0.0559401	0.106261	3.34916	0.000884332	0.00841842	-1.72533
32491	0.0562699	0.992581	3.47365	0.000567195	0.00581819	-1.31329
40026	0.0564341	0.115	3.24675	0.00126163	0.0112867	-2.05356
65125	0.0565835	0.899043	4.34781	1.73e-05	0.000299909	1.9737
79538	0.0566183	0.83965	4.25988	2.53e-05	0.000417329	1.61238
54712	0.0566464	0.238435	2.68865	0.00746183	0.0462176	-3.67087
64803	0.0567815	0.172853	2.73038	0.0065944	0.0422207	-3.56006
2511	0.0567957	0.954156	9.38802	4.03e-19	6.1e-17	32.6063
41726	0.0568732	0.982141	6.44197	3.26e-10	1.52e-08	12.4791
62569	0.0569206	0.791554	3.44852	0.000621066	0.00627162	-1.39762
80027	0.057081	0.980402	10.2612	3.55e-22	7.51e-20	39.5437
18318	0.0573218	0.228653	2.71095	0.00698642	0.0440639	-3.61188
87022	0.0573253	0.106251	3.07567	0.00223862	0.0178422	-2.58027
26646	0.057488	0.134959	3.58845	0.000372184	0.00410592	-0.92079
16681	0.0580228	0.677317	3.08483	0.00217234	0.0174378	-2.55276
52675	0.0580248	0.100324	2.84307	0.00468785	0.0321839	-3.2526
266	0.0580353	0.104145	3.74548	0.000205386	0.00249592	-0.364544
23304	0.0581068	0.184581	2.84517	0.00465769	0.0320143	-3.24677
77342	0.0581817	0.834384	4.08321	5.33e-05	0.000784904	0.906946
90328	0.0583118	0.82834	4.5038	8.68e-06	0.000162864	2.63122
41177	0.0584779	0.596615	2.95851	0.00326739	0.0241215	-2.92525
13247	0.0584987	0.75375	2.74552	0.00630299	0.040774	-3.51946
98	0.0587672	0.115933	2.67036	0.00787347	0.048103	-3.71893
11857	0.058789	0.0965483	3.97867	8.17e-05	0.00113715	0.502498
37887	0.0588108	0.975206	3.06802	0.00229543	0.0182172	-2.60319
60085	0.0588243	0.11734	2.97478	0.00310244	0.0231553	-2.87811
51002	0.058907	0.0913242	4.54648	7.16e-06	0.000138666	2.81476
64934	0.059101	0.905994	3.99917	7.52e-05	0.00105605	0.581057
86179	0.059308	0.193317	4.00026	7.49e-05	0.00105271	0.58523
51720	0.059398	0.968419	5.33633	1.56e-07	4.42e-06	6.48982
38016	0.0594185	0.165807	2.78446	0.00560594	0.0372865	-3.41401
47074	0.0596033	0.876794	2.68059	0.00764074	0.0470013	-3.69209
32058	0.0597331	0.979602	3.75357	0.000199072	0.00243711	-0.335257
61134	0.0600579	0.132586	4.1544	3.96e-05	0.000612326	1.18792
8457	0.0603426	0.955568	2.95854	0.00326708	0.0241215	-2.92516
29513	0.0604223	0.0970022	3.60274	0.000352897	0.0039377	-0.871113
13557	0.060595	0.870572	3.00858	0.0027839	0.0212464	-2.77939
75151	0.0608048	0.244778	3.33782	0.000920211	0.00870089	-1.76213
38160	0.0608208	0.110372	3.50299	0.000509853	0.00532603	-1.21415
39505	0.0609378	0.0926258	3.29896	0.00105377	0.009701	-1.88743
65668	0.0610055	0.0971273	3.18479	0.00155742	0.0134523	-2.24747
24366	0.0610749	0.80923	3.48478	0.000544764	0.00562981	-1.27577
18309	0.0611414	0.784352	3.67472	0.000269179	0.00313781	-0.617956
2559	0.0613143	0.571943	3.00804	0.00278875	0.0212669	-2.78098
76508	0.0613231	0.925199	5.25699	2.34e-07	6.41e-06	6.09726
72401	0.0613238	0.873894	3.10253	0.00204932	0.0166953	-2.49938
82353	0.0614927	0.897708	4.97501	9.56e-07	2.28e-05	4.74389
60189	0.0615827	0.101326	3.1516	0.00174103	0.0146796	-2.34987
30050	0.0616822	0.894131	3.56815	0.000401303	0.00437551	-0.991076
18672	0.061712	0.845728	2.88868	0.00407045	0.0287262	-3.12478
57395	0.0618571	0.893088	4.19766	3.3e-05	0.00052614	1.36081
80026	0.0618627	0.958903	7.00587	9.91e-12	5.93e-10	15.8883
3174	0.0619459	0.94293	4.10304	4.91e-05	0.000731923	0.984748
75375	0.0620564	0.945509	5.46543	7.96e-08	2.39e-06	7.13953
22593	0.062311	0.799379	4.24072	2.75e-05	0.000447711	1.53455
54655	0.0624371	0.914278	4.42714	1.22e-05	0.000220789	2.30542
31802	0.0624619	0.889291	3.2305	0.00133373	0.0118608	-2.10478
64220	0.0625496	0.107733	4.61067	5.35e-06	0.000107441	3.09377
12091	0.0626346	0.677498	2.75671	0.00609502	0.0396805	-3.48929
85726	0.0626398	0.259666	2.82264	0.00499112	0.0338292	-3.30924
40641	0.0626622	0.753024	3.14062	0.00180604	0.0151085	-2.38352
17530	0.0630013	0.977932	4.67102	4.05e-06	8.49e-05	3.35933
66639	0.063085	0.859823	3.86423	0.000129197	0.00167979	0.0709123
14177	0.0631231	0.402817	3.09319	0.00211338	0.0171177	-2.52757
49087	0.0631712	0.32321	3.14226	0.00179619	0.0150373	-2.3785
89001	0.0632278	0.522122	2.69466	0.00733091	0.045545	-3.65502
47600	0.0632534	0.0895098	2.77908	0.00569797	0.0377085	-3.42867
47885	0.0632571	0.0942502	3.13515	0.00183926	0.0153236	-2.40024
64907	0.0632779	0.130944	2.85048	0.00458211	0.0315722	-3.23198
67855	0.0634729	0.800883	3.66465	0.000279643	0.00324407	-0.653641
86446	0.0634877	0.908976	4.59309	5.79e-06	0.000115188	3.01701
9246	0.0635479	0.143507	3.36366	0.000840303	0.00806777	-1.67805
75971	0.0635491	0.89695	3.45593	0.000604714	0.00612857	-1.37283
20677	0.0635805	0.992417	3.90087	0.000111709	0.00147725	0.207826
7772	0.0637358	0.162102	3.00044	0.00285774	0.0216824	-2.80326
82334	0.0637737	0.183343	4.05352	6.02e-05	0.000872283	0.791108
21064	0.0638634	0.83365	2.73607	0.00648342	0.0416887	-3.54482
62795	0.0640947	0.162976	3.45678	0.000602861	0.00611818	-1.36998
25156	0.064185	0.931141	4.32411	1.92e-05	0.000327664	1.87565
40563	0.0643421	0.227791	2.98224	0.00302941	0.0227388	-2.85641
43588	0.0645719	0.106126	2.7554	0.00611913	0.0398027	-3.49284
80930	0.0646519	0.216034	3.30649	0.00102657	0.00949827	-1.86326
7475	0.0651221	0.864478	3.17386	0.00161578	0.0138158	-2.28129
58987	0.0652609	0.721026	2.93541	0.00351548	0.0255699	-2.99178
68356	0.0654526	0.827956	4.44774	1.11e-05	0.000204074	2.39248
44398	0.0656133	0.100736	2.9495	0.00336219	0.0246899	-2.95126
71467	0.0656604	0.120113	2.71565	0.00688964	0.043613	-3.59937
62002	0.0657226	0.966283	4.62739	4.95e-06	0.000100686	3.16705
12938	0.0658341	0.967273	6.93871	1.52e-11	8.86e-10	15.4704
65783	0.0658827	0.10672	3.01109	0.00276148	0.0211236	-2.77202
54017	0.0658955	0.801663	4.32691	1.9e-05	0.000324701	1.88719
40025	0.0660356	0.132139	3.36732	0.000829548	0.00799875	-1.66612
32963	0.0660774	0.198474	3.00513	0.00281499	0.0214015	-2.78952
87532	0.0663456	0.962898	6.50917	2.17e-10	1.05e-08	12.8732
73426	0.0663516	0.101988	2.7003	0.00720988	0.0449926	-3.6401
39107	0.0664336	0.160298	2.89718	0.00396389	0.028205	-3.10074
24851	0.0664406	0.933494	6.76335	4.58e-11	2.48e-09	14.394
33123	0.0665566	0.154173	2.91449	0.00375475	0.0270169	-3.05157
1238	0.0665922	0.191465	3.06228	0.00233891	0.0184708	-2.62035
43613	0.0666165	0.129231	3.33118	0.000941879	0.00885778	-1.78366
78405	0.0667779	0.684053	2.73063	0.0065895	0.0422014	-3.55939
54077	0.0671241	0.134899	2.89494	0.00399163	0.0283215	-3.10706
13553	0.0672015	0.315342	2.68992	0.00743405	0.046071	-3.66753
10272	0.0672504	0.123504	2.95664	0.00328685	0.0242279	-2.93065
7471	0.0673058	0.889725	2.68767	0.00748345	0.0462876	-3.67346
7867	0.0674288	0.166769	2.99912	0.00286988	0.0217305	-2.80712
52140	0.0674737	0.21657	2.67817	0.00769514	0.047284	-3.69843
85673	0.0674977	0.377324	3.22335	0.0013666	0.0120908	-2.1272
35838	0.0676008	0.913007	4.7801	2.43e-06	5.37e-05	3.8472
56967	0.0676228	0.874949	5.61609	3.57e-08	1.15e-06	7.91472
46441	0.0676323	0.167495	4.61601	5.22e-06	0.000105245	3.11718
70870	0.0677985	0.227706	2.85827	0.00447327	0.0309554	-3.21023
26513	0.0678256	0.0967531	2.71264	0.00695139	0.0439171	-3.60737
7758	0.0678516	0.0959096	4.62626	4.98e-06	0.000101119	3.16208
13939	0.0679316	0.12787	3.11237	0.00198374	0.0162259	-2.46958
1591	0.0679922	0.125307	2.85775	0.00448047	0.0309765	-3.21169
61681	0.0680589	0.964371	5.14666	4.09e-07	1.06e-05	5.55989
81361	0.0684895	0.163092	3.57472	0.000391658	0.00428493	-0.968383
16927	0.0686614	0.933688	3.49512	0.000524676	0.00546306	-1.24082
30032	0.0686622	0.958525	5.45002	8.64e-08	2.57e-06	7.06126
26230	0.0687739	0.110069	3.62725	0.000321976	0.00363976	-0.785451
20969	0.0687877	0.943093	3.28471	0.0011071	0.0101058	-1.93302
13937	0.0690564	0.960412	2.9942	0.00291562	0.02201	-2.82154
72413	0.0692674	0.872908	4.76849	2.57e-06	5.62e-05	3.79478
489	0.0694158	0.860234	3.02885	0.00260754	0.0201732	-2.71968
88941	0.0694842	0.1554	4.34517	1.75e-05	0.000303151	1.96273
30282	0.0695003	0.134467	2.90306	0.0038916	0.027823	-3.08405
90156	0.0695388	0.937631	4.817	2.04e-06	4.56e-05	4.01449
81472	0.0696356	0.156149	4.51635	8.2e-06	0.000155497	2.68502
35834	0.0696449	0.9417	6.29875	7.63e-10	3.37e-08	11.6503
40840	0.0697241	0.328539	2.72952	0.00661144	0.0423057	-3.56238
77424	0.0700965	0.684863	3.43885	0.000643033	0.00646247	-1.42991
11960	0.0701376	0.147407	2.82373	0.00497447	0.0337397	-3.30622
86266	0.0704346	0.247144	3.63158	0.000316775	0.00359904	-0.770229
86926	0.070493	0.452068	4.02315	6.82e-05	0.00097601	0.673399
10335	0.0706727	0.880781	6.24052	1.07e-09	4.65e-08	11.3176
33767	0.0708388	0.125129	3.33372	0.000933537	0.00879722	-1.77543
56950	0.0708484	0.916902	3.38617	0.000776035	0.0075346	-1.60433
9395	0.0709494	0.13963	2.72221	0.00675683	0.0430151	-3.5819
11156	0.071288	0.922363	3.73056	0.000217516	0.00261218	-0.41835
68639	0.0713767	0.795717	2.73688	0.00646793	0.0416536	-3.54267
79925	0.0714694	0.67471	2.79117	0.00549312	0.0366557	-3.39569
229	0.0715749	0.103164	3.0869	0.00215759	0.0173595	-2.54653
53046	0.0717	0.657362	2.84857	0.00460908	0.0317288	-3.23728
55244	0.0717469	0.768638	3.15921	0.00169724	0.0143687	-2.32648
46230	0.0719241	0.807376	3.19136	0.00152326	0.0132323	-2.22708
26454	0.0719654	0.13321	3.22065	0.00137922	0.0121885	-2.13567
31141	0.0720654	0.920527	3.54137	0.000442984	0.00473332	-1.08321
55895	0.0721105	0.494275	3.61704	0.000334524	0.00375488	-0.821173
16035	0.0722411	0.971857	3.74542	0.000205434	0.00249592	-0.364764
39532	0.0723409	0.881921	5.72601	1.97e-08	6.62e-07	8.49167
18684	0.072416	0.323688	2.8382	0.00475865	0.0325685	-3.26615
62897	0.0725581	0.77185	2.97027	0.00314745	0.0234366	-2.89122
14286	0.0727867	0.840541	3.01755	0.00270458	0.0207844	-2.75303
61030	0.0730033	0.107048	3.14404	0.00178556	0.0149539	-2.37305
7292	0.0730456	0.106499	2.93515	0.00351837	0.0255786	-2.99252
43352	0.0730539	0.765249	3.04522	0.00247267	0.0193635	-2.67118
46963	0.073286	0.11725	2.81619	0.00509048	0.034409	-3.32703
3007	0.0733722	0.993174	15.3132	2.59e-42	8.05e-39	85.4113
69971	0.0733965	0.827297	4.35448	1.68e-05	0.000291992	2.00136
48445	0.0735932	0.962506	10.1014	1.32e-21	2.6e-19	38.2454
65521	0.0736043	0.125927	4.93846	1.14e-06	2.68e-05	4.57333
44399	0.0737113	0.0900345	3.55707	0.000418086	0.00452114	-1.02929
48614	0.0737722	0.935614	7.24392	2.12e-12	1.38e-10	17.3953
9781	0.0738005	0.118793	3.06871	0.0022903	0.0181894	-2.60114
68614	0.0739168	0.263225	3.19811	0.00148889	0.0130034	-2.20609
71441	0.0740764	0.13372	3.35789	0.000857589	0.00820545	-1.6969
11559	0.0741218	0.951689	3.38307	0.000784604	0.00760134	-1.61451
70984	0.0741892	0.115806	2.86208	0.00442081	0.0306681	-3.19956
40550	0.0742504	0.21216	2.93668	0.00350135	0.0255127	-2.98812
28494	0.074283	0.0905117	3.04296	0.00249091	0.0194723	-2.67789
1689	0.074285	0.197798	2.8619	0.00442331	0.030676	-3.20007
65037	0.0743173	0.179181	2.89645	0.00397293	0.0282379	-3.1028
50816	0.0743231	0.115418	3.64293	0.000303538	0.00346274	-0.730327
7662	0.0743882	0.718912	3.45015	0.000617435	0.00623776	-1.39217
54754	0.0743902	0.632888	2.93145	0.00355964	0.0258201	-3.00312
66811	0.07462	0.551702	3.34613	0.000893768	0.00849383	-1.73515
79855	0.0747534	0.766808	3.5665	0.000403758	0.00439801	-0.996766
13343	0.0747672	0.143737	2.7673	0.00590413	0.0388207	-3.46067
18302	0.0751033	0.203653	3.01711	0.00270836	0.0208024	-2.7543
76814	0.0751752	0.5773	4.89602	1.4e-06	3.23e-05	4.37665
67697	0.0752048	0.714113	3.49162	0.000531407	0.00551778	-1.25268
83754	0.0752556	0.188688	2.88442	0.00412471	0.0290021	-3.13678
57493	0.0754419	0.500818	2.67365	0.00779789	0.0477453	-3.7103
46503	0.0755729	0.712917	4.33902	1.8e-05	0.000310659	1.93726
18895	0.075592	0.973456	3.5913	0.000368261	0.00408029	-0.9109
12859	0.0756135	0.25525	2.65762	0.00817211	0.0495362	-3.75221
24244	0.0756885	0.136322	3.61686	0.000334751	0.00375488	-0.821806
40128	0.0757065	0.933718	2.82086	0.00501845	0.0339631	-3.31417
63866	0.0757261	0.136216	3.36462	0.000837466	0.00805433	-1.67491
75982	0.0757404	0.902971	2.67658	0.00773126	0.047448	-3.70262
51107	0.0757511	0.212376	3.09938	0.00207073	0.0168387	-2.5089
62806	0.0758003	0.818055	2.77475	0.0057729	0.0381481	-3.44043
15748	0.0758378	0.110622	3.47342	0.000567672	0.0058189	-1.31408
32455	0.0759805	0.236769	2.66228	0.00806155	0.0490118	-3.74004
90551	0.0762015	0.862422	3.08712	0.00215603	0.0173583	-2.54587
30029	0.0763702	0.841451	3.01673	0.00271168	0.0208208	-2.75542
81885	0.0766183	0.592236	4.17756	3.59e-05	0.000563622	1.28029
89042	0.0767065	0.635504	3.8577	0.000132573	0.00171177	0.0466452
68866	0.076798	0.672249	3.08226	0.00219077	0.0175355	-2.5605
61719	0.0769338	0.143568	3.43595	0.000649764	0.00651449	-1.43958
53606	0.0770489	0.114057	6.11483	2.23e-09	8.98e-08	10.6085
25016	0.077599	0.132598	4.11314	4.7e-05	0.000705258	1.02451
78590	0.0776103	0.506009	3.57856	0.000386112	0.00424496	-0.955077
4190	0.0781095	0.121312	2.65952	0.00812688	0.0493287	-3.74725
48813	0.0781652	0.260096	3.10101	0.00205965	0.0167673	-2.50399
74421	0.0785516	0.916355	4.3231	1.93e-05	0.000328861	1.87146
51817	0.078606	0.330349	2.7108	0.00698953	0.0440712	-3.61228
75900	0.0789541	0.130044	3.74589	0.000205062	0.00249546	-0.363067
49607	0.0790308	0.57076	2.7482	0.00625265	0.0405536	-3.51225
50720	0.0791075	0.792549	2.74444	0.00632344	0.0408827	-3.52237
48288	0.0791622	0.823374	3.50392	0.000508128	0.00531544	-1.21099
90300	0.0793308	0.862604	6.42302	3.65e-10	1.69e-08	12.3685
21510	0.0793609	0.0839904	2.98978	0.0029572	0.0222639	-2.83444
73701	0.0795682	0.102009	3.07674	0.0022308	0.0177924	-2.57706
77160	0.0797747	0.790149	4.73123	3.06e-06	6.61e-05	3.62737
59214	0.0798534	0.619334	3.43256	0.000657724	0.00657915	-1.45088
8316	0.0799774	0.484279	5.8822	8.32e-09	3e-07	9.32788
47597	0.0799812	0.121993	3.0964	0.00209116	0.0169745	-2.51789
12887	0.0802514	0.931109	4.538	7.44e-06	0.000142729	2.77816
10073	0.080593	0.209177	2.67366	0.00779759	0.0477453	-3.71027
86848	0.0807316	0.166088	3.05981	0.00235783	0.0186006	-2.62772
33166	0.0807574	0.190318	4.16278	3.82e-05	0.000594421	1.22127
72586	0.0808138	0.74964	2.71693	0.00686358	0.0434824	-3.59597
68543	0.0809153	0.147058	2.95661	0.0032872	0.0242279	-2.93075
20979	0.080995	0.91814	2.823	0.00498558	0.0338019	-3.30823
29468	0.0812694	0.226396	3.71587	0.000230121	0.00274092	-0.471144
[truncated: 1,716 more rows]
