# Supplementary material for: N6-Methyladenosine-related alternative splicing events play a role in bladder cancer
Source: publisher site journal article supplement (doi:10.1515/biol-2022-0479), 2022-01-01
Supplement: Supplementary file 4 [file biol-2022-0479_suppl_table2.xlsx]

## Sheet: M6A_DEAS_coefficient
M6A gene	DEAS gene	DEAS AS	splice_type	Pvalue	corValue
METTL3	ZCCHC11	3007	AT	6.67003e-35	0.56413
METTL3	SMARCC2	22391	AD	2.94925e-28	0.51376
METTL3	C2CD5	20733	ES	1.15356e-26	0.500326
METTL3	RBM39	95934	ES	1.27552e-30	0.532664
METTL3	IP6K2	64747	RI	4.62899e-30	0.528294
METTL3	MBD1	45518	ES	1.31876e-30	0.532552
METTL3	AKAP17A	88395	RI	2.81263e-32	0.545236
METTL3	IP6K2	64745	RI	4.62899e-30	0.528294
METTL3	WDR27	78474	ES	1.45085e-39	0.59495
METTL3	IP6K2	64752	RI	4.62899e-30	0.528294
METTL3	SRSF2	43661	RI	9.08655e-38	0.583458
METTL3	CCDC66	65341	AT	5.39305e-31	0.535548
METTL3	SRSF2	43662	RI	9.08655e-38	0.583458
METTL3	IP6K2	64750	RI	4.62899e-30	0.528294
METTL3	APBB3	73673	RI	1.2542e-26	0.500012
METTL3	SMARCC2	22390	RI	2.94925e-28	0.51376
METTL3	MEN1	16708	AD	3.6259e-27	0.504631
METTL3	GGA3	43399	RI	2.57499e-35	0.566998
METTL3	TOP3B	61266	RI	9.15554e-43	0.614334
METTL3	TIA1	53868	AT	4.06658e-48	0.64401
METTL3	NAA40	16550	ES	1.79014e-47	0.640608
METTL3	PGAP2	14002	AP	2.71144e-27	0.505702
METTL3	WDR27	78473	ES	1.45085e-39	0.59495
METTL3	PHF12	40023	AT	2.39644e-30	0.530534
METTL3	TAF1C	37820	RI	4.73303e-31	0.535983
METTL3	MEN1	16706	AD	3.6259e-27	0.504631
METTL3	ILF3	47570	AT	7.54999e-36	0.570654
METTL3	BBS1	17056	ES	6.29356e-27	0.502587
METTL3	CSAD	21947	AT	1.04825e-28	0.517445
METTL3	METTL17	26476	RI	8.94625e-38	0.583502
METTL3	INTS3	7758	RI	2.52852e-34	0.560067
METTL3	NBPF12	7361	ES	8.62402e-31	0.533979
METTL3	ZNF558	47260	AP	3.1275e-31	0.537359
METTL3	DDX17	62238	AP	3.82913e-32	0.544239
METTL3	METTL17	26477	RI	8.94625e-38	0.583502
METTL3	ZBTB1	27892	AT	1.06715e-30	0.533264
METTL3	AKAP17A	88392	AT	2.81263e-32	0.545236
METTL3	TCERG1	73913	ES	1.49773e-51	0.661459
METTL3	DDX11	20963	RI	1.03315e-27	0.509233
METTL3	CLCN6	686	AT	5.96308e-30	0.527428
METTL3	IP6K2	64742	AT	4.62899e-30	0.528294
METTL3	MTA1	29647	ES	8.20383e-39	0.590193
METTL3	DDX11	20956	AP	1.03315e-27	0.509233
METTL3	DDX11	20980	ES	1.03315e-27	0.509233
METTL3	ZNF169	86926	AT	7.44642e-37	0.577434
METTL3	DDX11	20964	AA	1.03315e-27	0.509233
METTL3	BBS1	17048	ES	6.29356e-27	0.502587
METTL3	ABCD4	28376	RI	9.35674e-30	0.525881
METTL3	ZNF333	48020	AT	4.28558e-30	0.528557
METTL3	IP6K2	64744	RI	4.62899e-30	0.528294
METTL3	PMPCB	81177	RI	7.66222e-27	0.501855
METTL3	PNISR	77055	RI	1.4086e-29	0.524469
METTL3	ZNF141	68345	AT	2.49637e-27	0.506006
METTL3	SDR39U1	27005	AP	2.14791e-37	0.581009
METTL3	RNF44	74655	AP	3.82941e-27	0.504429
METTL3	TTC31	54096	RI	2.48497e-40	0.599714
METTL3	SRSF6	59434	ES	1.32016e-44	0.624908
METTL3	SRSF2	43663	RI	9.08655e-38	0.583458
METTL3	TOP3B	61267	RI	9.15554e-43	0.614334
METTL3	LUC7L3	42476	RI	6.95803e-37	0.577631
METTL3	BBS1	17050	ES	6.29356e-27	0.502587
METTL3	PAXBP1	60374	AT	1.50392e-37	0.582026
METTL3	GTPBP3	48288	AA	3.76094e-40	0.598602
METTL3	SRSF2	43660	RI	9.08655e-38	0.583458
METTL3	METTL17	26475	RI	8.94625e-38	0.583502
METTL3	SUPT7L	53041	RI	2.09042e-27	0.506658
METTL3	PHF12	40025	RI	2.39644e-30	0.530534
METTL3	FAM219B	31792	RI	1.03315e-26	0.500738
METTL3	DDX11	20967	ES	1.03315e-27	0.509233
METTL3	NPHP3	66811	AT	8.57843e-28	0.509909
METTL3	DBF4B	41887	AA	1.27779e-29	0.524806
METTL3	CREBZF	18136	RI	1.58844e-41	0.606984
METTL3	MSANTD2	19240	AP	4.54213e-37	0.578861
METTL3	DDX11	20969	ES	1.03315e-27	0.509233
METTL3	HOOK2	47867	AA	2.86894e-27	0.505495
METTL3	TAF1C	37817	AA	4.73303e-31	0.535983
METTL3	PHF12	40026	RI	2.39644e-30	0.530534
METTL3	MBD1	45501	AT	1.31876e-30	0.532552
METTL3	CSAD	21952	ES	1.04825e-28	0.517445
METTL3	FAM219B	31802	ES	1.03315e-26	0.500738
METTL3	TMEM55B	26454	RI	5.28784e-31	0.535614
METTL3	DDX11	20974	AA	1.03315e-27	0.509233
METTL3	FAM219B	31798	ES	1.03315e-26	0.500738
METTL3	CSAD	21954	RI	1.04825e-28	0.517445
METTL3	CSAD	21955	RI	1.04825e-28	0.517445
METTL3	ENOSF1	44462	AT	1.61759e-28	0.515905
METTL3	TTC13	10257	AA	5.74048e-28	0.511364
METTL3	SAFB	46853	AA	1.32121e-30	0.532546
METTL3	NAA40	16552	AA	1.79014e-47	0.640608
METTL3	PGAP2	14003	AD	2.71144e-27	0.505702
METTL3	DMTF1	80313	ES	8.15717e-48	0.642418
METTL3	NUP43	78098	RI	4.05942e-27	0.504213
METTL3	PCGF3	68405	RI	4.12636e-30	0.528686
METTL3	DDX20	4189	RI	1.37498e-28	0.516483
METTL3	ADNP	59788	AP	4.78723e-27	0.503603
METTL3	SLC25A14	90098	RI	1.5358e-28	0.51609
METTL3	TMCO6	73701	ES	3.33234e-39	0.592677
METTL3	ARID1A	1297	ES	3.67718e-27	0.504579
METTL3	PRPF39	27396	ES	2.35732e-62	0.709649
METTL3	ARID1A	1296	AA	3.67718e-27	0.504579
METTL3	SMARCC2	22393	ES	2.94925e-28	0.51376
METTL3	PMPCB	81180	ES	7.66222e-27	0.501855
METTL3	BBS1	17047	RI	6.29356e-27	0.502587
METTL3	ZNF337	58877	AP	1.91938e-35	0.567878
METTL3	NUPL2	78961	AT	9.05753e-29	0.517962
METTL3	TTC31	54077	RI	2.48497e-40	0.599714
METTL3	UCKL1	60179	RI	4.33381e-27	0.503971
METTL3	OSGEP	26441	AP	3.57093e-44	0.622462
METTL3	CCAR1	11960	AD	3.36908e-37	0.57972
METTL3	DDX11	20979	AD	1.03315e-27	0.509233
METTL3	MRI1	95017	ES	4.32802e-31	0.536281
METTL3	CPSF7	16198	AD	1.51438e-28	0.51614
METTL3	ZNF223	50275	ES	3.15015e-27	0.50515
METTL3	ZFC3H1	23405	AT	3.09228e-27	0.505218
METTL3	OSGEP	26443	RI	3.57093e-44	0.622462
METTL3	RNPC3	3907	AA	2.74603e-32	0.545314
METTL3	APBB3	73683	RI	1.2542e-26	0.500012
METTL3	WDR27	78476	ES	1.45085e-39	0.59495
METTL3	PABPN1	26732	RI	8.47525e-37	0.57706
METTL3	PMPCB	81174	AT	7.66222e-27	0.501855
METTL3	PGAP2	14016	ES	2.71144e-27	0.505702
METTL3	ACIN1	26708	ES	1.1503e-85	0.788047
METTL3	ACIN1	26701	AP	1.1503e-85	0.788047
METTL3	ZCCHC8	24961	RI	1.083e-30	0.533215
METTL3	REV1	54712	RI	1.13674e-31	0.540694
METTL3	ZNF700	47760	AP	1.12166e-29	0.525256
METTL3	SIN3B	48215	AT	3.76425e-37	0.579401
METTL3	YLPM1	28429	ES	3.06096e-30	0.529703
METTL3	DDX20	4190	RI	1.37498e-28	0.516483
METTL3	SRRM1	1128	ES	1.78199e-36	0.574899
METTL14	ATP2A2	24418	RI	2.54493e-68	0.732614
METTL14	ZNF318	76265	AT	1.45672e-54	0.675857
METTL14	ANP32A	270111	AA	5.09174e-32	0.543315
METTL14	CAST	116465	ES	2.02027e-28	0.515113
METTL14	SMARCC2	22391	AD	7.49621e-65	0.719544
METTL14	CSDE1	4336	ES	5.92219e-70	0.738512
METTL14	HNRNPA2B1	318763	ES	1.97581e-46	0.635003
METTL14	PCBP2	213888	ES	6.82577e-43	0.61508
METTL14	CAMKK2	24853	ES	2.07359e-36	0.574456
METTL14	CDYL	75229	AP	6.66153e-46	0.632121
METTL14	WHSC1	68527	AT	6.66328e-36	0.571024
METTL14	LRRFIP1	58133	ES	2.96345e-37	0.580088
METTL14	DPF2	16815	ES	2.35849e-34	0.56028
METTL14	SPAG9	42494	ES	3.93207e-63	0.712776
METTL14	CLDND1	65752	AT	1.96224e-29	0.52332
METTL14	SNRNP200	563711	ES	4.02524e-40	0.59842
METTL14	MINK1	38598	ES	1.55504e-29	0.524127
METTL14	CAST	72863	ES	2.02027e-28	0.515113
METTL14	AZI2	63794	AT	8.86408e-62	0.70731
METTL14	2022-09-11	69616	AT	2.45469e-29	0.522541
METTL14	RBM26	26100	ES	1.43656e-46	0.635754
METTL14	TMEM199	39890	AT	1.06697e-33	0.555613
METTL14	H2AFY	73442	AP	1.1883e-35	0.569308
METTL14	CCSER2	12409	ES	1.68241e-41	0.606834
METTL14	HNRNPA2B1	79038	AA	1.97581e-46	0.635003
METTL14	IPO11	72191	AT	2.29012e-34	0.560371
METTL14	CBWD2	55054	ES	1.75047e-27	0.507309
METTL14	PPP3CB	12153	AT	1.91366e-33	0.553787
METTL14	CASP8	56813	AP	3.57484e-34	0.559002
METTL14	FUBP1	3546	ES	1.63236e-32	0.546987
METTL14	CASP8	56816	AT	3.57484e-34	0.559002
METTL14	DDX23	21484	ES	9.42962e-59	0.694605
METTL14	PLEKHA1	13355	ES	1.31249e-32	0.547686
METTL14	TRMT11	77431	AT	4.4146e-42	0.610306
METTL14	WDPCP	53729	AT	1.14447e-40	0.601783
METTL14	ARHGAP11A	29818	AA	6.44143e-28	0.510947
METTL14	DNAJC14	22260	AP	1.99751e-80	0.772857
METTL14	C2CD5	20733	ES	2.5175e-52	0.665239
METTL14	PCNP	65963	AA	1.1879e-82	0.779458
METTL14	PARP11	19762	AT	1.87738e-31	0.539046
METTL14	AK2	1656	ES	6.63486e-28	0.51084
METTL14	NCOR2	25143	AD	4.91781e-32	0.543428
METTL14	SCP2	3045	ES	2.87707e-38	0.586698
METTL14	KANSL3	54541	AT	2.28625e-38	0.587342
METTL14	CAMKK2	24851	AT	2.07359e-36	0.574456
METTL14	NUMB	28288	ES	1.82085e-70	0.740329
METTL14	CALCOCO1	22108	RI	4.42234e-34	0.558346
METTL14	ABCF2	82355	AT	2.52179e-39	0.593441
METTL14	NFYA	76094	ES	5.92489e-52	0.663431
METTL14	FIP1L1	69310	AT	3.54385e-35	0.566039
METTL14	KIF13A	75457	ES	7.13609e-35	0.563925
METTL14	RIC8A	13590	AA	6.29616e-32	0.542624
METTL14	ESCO2	83185	AT	2.19759e-27	0.506475
METTL14	BSDC1	1590	AT	2.35367e-48	0.645255
METTL14	UVRAG	17878	AP	3.19839e-51	0.659834
METTL14	ASAP2	52611	ES	8.71425e-50	0.652635
METTL14	MPHOSPH8	25400	AT	6.48207e-32	0.542529
METTL14	SEH1L	44727	AA	7.15207e-29	0.518795
METTL14	DPM1	95975	ES	2.68787e-28	0.514092
METTL14	TCF20	62501	ES	2.56857e-54	0.67471
METTL14	CTNND1	15999	ES	1.64758e-42	0.612837
METTL14	MBD1	45518	ES	2.78856e-39	0.593165
METTL14	ALS2	56917	AT	1.29977e-58	0.694004
METTL14	SYNCRIP	76934	AT	4.64784e-71	0.742414
METTL14	USP33	3534	ES	1.18151e-32	0.548023
METTL14	OSBPL9	2960	AP	2.89426e-48	0.644785
METTL14	CSNK1G3	73145	ES	1.16157e-69	0.737467
METTL14	CCNE2	84585	ES	6.81724e-29	0.518964
METTL14	LIMS1	54889	AT	1.17167e-39	0.595531
METTL14	CANT1	43973	RI	1.47157e-30	0.532183
METTL14	CEP68	53777	AT	1.10442e-30	0.533149
METTL14	BRD3	88089	AT	5.02359e-41	0.603963
METTL14	FIP1L1	69313	ES	3.54385e-35	0.566039
METTL14	MLLT10	10970	AT	4.04348e-41	0.604535
METTL14	TANK	55730	AP	6.87501e-38	0.584247
METTL14	GINS4	83515	AT	2.60123e-31	0.537969
METTL14	NFATC3	37186	ES	8.64603e-54	0.672236
METTL14	APP	60283	ES	2.96356e-43	0.617187
METTL14	POM121	79927	AT	5.54296e-72	0.745622
METTL14	GRSF1	69451	AP	3.02726e-39	0.59294
METTL14	SLAIN2	69214	ES	3.28458e-91	0.802865
METTL14	CLSPN	1731	AT	2.61555e-28	0.51419
METTL14	SMAP1	76647	ES	6.1858e-44	0.621102
METTL14	DDHD2	83376	AP	2.0863e-40	0.600182
METTL14	CARF	56967	AT	1.10447e-47	0.641721
METTL14	ITSN1	60468	AT	3.08381e-35	0.566457
METTL14	UBE2D3	70130	ES	2.53492e-89	0.797957
METTL14	TPGS2	45269	ES	2.63664e-35	0.566927
METTL14	G3BP2	69550	ES	3.22934e-105	0.835364
METTL14	CCDC66	65341	AT	2.13487e-30	0.530926
METTL14	SSR1	75259	AA	2.62498e-50	0.655272
METTL14	CELF1	15763	AA	4.14026e-79	0.768845
METTL14	GRB2	43439	AP	2.86312e-37	0.580187
METTL14	SMARCC2	22390	RI	7.49621e-65	0.719544
METTL14	TES	81522	AP	3.88364e-28	0.512772
METTL14	HNRNPDL	69705	ES	4.9616e-33	0.550784
METTL14	NPM1	74519	AT	3.78858e-37	0.579383
METTL14	NIF3L1	56772	ES	1.86236e-32	0.546564
METTL14	GGA3	43399	RI	2.74497e-30	0.530073
METTL14	PCMT1	78104	AT	3.16451e-28	0.513507
METTL14	IQCB1	96476	ES	6.34661e-30	0.527214
METTL14	FBXO5	78210	AP	1.14769e-36	0.57618
METTL14	ZC3H7A	34033	AP	5.50411e-37	0.578308
METTL14	SLK	13030	ES	2.67176e-40	0.59952
METTL14	AKT1	29559	AP	1.37519e-29	0.524552
METTL14	ZNF207	40205	ES	1.10093e-60	0.702795
METTL14	GALK2	30516	AP	5.13414e-42	0.609916
METTL14	KLHL42	20900	ES	2.58245e-40	0.599611
METTL14	BRD1	62751	AA	4.06906e-33	0.551412
METTL14	DCTN2	22644	ES	1.05778e-42	0.613967
METTL14	RPP14	65434	AD	1.68562e-72	0.747397
METTL14	MRPL19	54157	AT	2.39394e-47	0.639936
METTL14	THAP9	69749	ES	6.20456e-36	0.571235
METTL14	KCTD7	79882	ES	4.19904e-38	0.585637
METTL14	ZNF585B	49454	AP	2.3374e-33	0.553159
METTL14	TBCK	70263	AP	2.2401e-39	0.593765
METTL14	BPTF	43116	AD	6.64496e-71	0.74187
METTL14	USO1	69551	ES	2.95743e-67	0.728681
METTL14	LPP	68087	AT	2.45928e-31	0.538155
METTL14	PHF12	40023	AT	3.33244e-31	0.537149
METTL14	SET	87776	AP	7.13758e-53	0.667877
METTL14	HDAC4	58232	AT	1.38957e-28	0.516445
METTL14	ABL2	9103	AT	5.0735e-33	0.550713
METTL14	UCHL5	9240	AT	2.24958e-46	0.634697
METTL14	EXOC1	69335	ES	8.24288e-37	0.57714
METTL14	COPA	8458	AA	2.00926e-38	0.587703
METTL14	SNX1	31090	AT	9.99509e-41	0.602142
METTL14	BBS1	17056	ES	1.06542e-27	0.509121
METTL14	PFKM	21429	ES	5.38383e-50	0.653697
METTL14	SPIDR	97934	AD	1.24165e-29	0.524905
METTL14	SUCLA2	25849	AP	3.55204e-50	0.65461
METTL14	HSPA14	10831	AT	1.06401e-37	0.58301
METTL14	TMPO	23849	ES	2.39852e-39	0.593578
METTL14	SEC31A	69734	ES	5.45469e-31	0.53551
METTL14	ZNF527	49506	AT	3.50961e-36	0.572914
METTL14	LRRFIP1	58132	ES	2.96345e-37	0.580088
METTL14	MXI1	13079	AP	3.48411e-31	0.537001
METTL14	PHLPP2	37476	AT	6.05087e-36	0.571309
METTL14	HUS1	79614	AT	2.38217e-44	0.62346
METTL14	ING3	81586	AT	3.93493e-59	0.696236
METTL14	RABGEF1	79898	ES	1.66034e-56	0.68473
METTL14	MRS2	75506	AT	3.12049e-27	0.505185
METTL14	PLEKHB2	55370	AT	7.06356e-54	0.67265
METTL14	NIN	27492	AT	1.98316e-42	0.612362
METTL14	NSUN4	2794	ES	1.14206e-53	0.671666
METTL14	FLCN	39461	AT	1.87596e-45	0.629642
METTL14	FAM122C	90167	ES	6.72759e-31	0.53481
METTL14	HIRA	61047	AP	8.68772e-45	0.62593
METTL14	DYNC1I2	55939	AP	3.38961e-45	0.628215
METTL14	KLHL7	78950	AT	3.16748e-33	0.552202
METTL14	DNM1L	21048	ES	6.96431e-28	0.510665
METTL14	ADD3	13077	ES	9.53897e-32	0.541268
METTL14	TRIM34	14067	AP	1.03057e-37	0.583101
METTL14	NAF1	71008	AT	8.55737e-81	0.773965
METTL14	FAM102B	3941	AT	7.27484e-38	0.584087
METTL14	PLSCR1	67169	ES	3.58389e-30	0.529167
METTL14	CCNDBP1	30218	RI	2.49047e-27	0.506015
METTL14	EIF4A2	68056	ES	7.08262e-36	0.570843
METTL14	DDX17	62238	AP	1.66251e-38	0.588231
METTL14	PGM3	76864	RI	1.0348e-30	0.533368
METTL14	NFE2L1	42158	AP	2.44164e-53	0.670102
METTL14	NCBP2	68263	AP	2.3617e-27	0.50621
METTL14	MORF4L2	89764	AP	3.34935e-54	0.674171
METTL14	FXR1	67746	ES	8.42701e-64	0.715432
METTL14	ATG16L1	58038	ES	3.86271e-31	0.536659
METTL14	MAX	27935	RI	1.39381e-27	0.508142
METTL14	ZBTB1	27892	AT	2.0995e-76	0.760337
METTL14	DNAJC5	60176	ES	3.5041e-35	0.566073
METTL14	CEP152	30503	ES	4.00229e-27	0.504266
METTL14	VRK2	53646	ES	1.95581e-40	0.600355
METTL14	TAF5L	10228	AT	2.87092e-70	0.739629
METTL14	PACRGL	68877	AT	9.06955e-41	0.6024
METTL14	ITPKB	10022	AT	9.07675e-27	0.501222
METTL14	DCTN6	83284	ES	2.23943e-30	0.530764
METTL14	CLCN6	686	AT	1.09249e-38	0.589399
METTL14	GGNBP2	40493	AT	7.24748e-31	0.534561
METTL14	DHDDS	1273	AT	5.68829e-33	0.550351
METTL14	KIF1B	602	AT	8.17492e-61	0.703333
METTL14	CSNK1A1	74047	ES	5.83123e-52	0.663465
METTL14	CTNNB1	64250	RI	2.72041e-55	0.679222
METTL14	CNOT4	81885	AT	2.2571e-59	0.697267
METTL14	ALDH6A1	28366	AP	5.48845e-48	0.643326
METTL14	PIGV	1301	RI	1.37972e-33	0.554811
METTL14	USP48	994	AP	1.63043e-52	0.666151
METTL14	C16orf52	35532	AT	5.79504e-34	0.55751
METTL14	RNF14	73843	ES	2.09884e-63	0.713862
METTL14	KDM4C	85823	AP	8.37645e-52	0.662697
METTL14	BTBD8	3754	AT	4.55725e-38	0.585407
METTL14	HP1BP3	937	AP	6.31544e-74	0.752217
METTL14	PCBP2	22052	ES	6.82577e-43	0.61508
METTL14	MPZL1	8871	ES	2.49549e-29	0.522484
METTL14	TERF1	84141	ES	4.00017e-61	0.704619
METTL14	MAX	27939	RI	1.39381e-27	0.508142
METTL14	SRSF7	53276	RI	8.50323e-33	0.549072
METTL14	HMGB1	25572	RI	2.51488e-28	0.51433
METTL14	MBNL1	67324	ES	1.96367e-51	0.66088
METTL14	GNB5	30638	AT	4.40256e-38	0.585504
METTL14	TAX1BP1	79060	AD	2.36014e-40	0.599852
METTL14	ASH2L	83369	AP	2.20015e-28	0.514808
METTL14	HMGB1	25568	AP	2.51488e-28	0.51433
METTL14	FAM114A1	69035	ES	7.68704e-28	0.510307
METTL14	SGOL2	56747	AT	1.68594e-28	0.515758
METTL14	KMT2C	82413	AP	3.16403e-63	0.713153
METTL14	OCIAD1	69253	AD	1.64894e-38	0.588254
METTL14	ARL1	23946	AT	4.13186e-43	0.61635
METTL14	BLOC1S6	30431	AT	2.47357e-72	0.746826
METTL14	PGAM5	25293	AT	2.74901e-27	0.505652
METTL14	PIP5K1A	7580	ES	5.23119e-59	0.695706
METTL14	PSMF1	58475	AA	1.41197e-41	0.607291
METTL14	EXOC7	43565	ES	6.02487e-37	0.578047
METTL14	MAP3K7	77020	ES	2.03909e-49	0.650751
METTL14	PCSK7	18901	ES	6.26378e-29	0.519263
METTL14	PNRC1	76987	AD	4.28757e-28	0.512416
METTL14	CCPG1	30726	RI	5.47632e-35	0.564726
METTL14	EIF4A2	68055	AA	7.08262e-36	0.570843
METTL14	ASCC3	77092	AT	9.32324e-46	0.631319
METTL14	PPM1B	53414	AT	2.42217e-47	0.639909
METTL14	BBS1	17048	ES	1.06542e-27	0.509121
METTL14	ODF2	87766	ES	2.41887e-27	0.506122
METTL14	ERAP1	72865	AT	4.78443e-42	0.610098
METTL14	PTP4A2	1537	ES	4.26103e-28	0.512438
METTL14	PCNP	65960	ES	1.1879e-82	0.779458
METTL14	MEF2D	8275	ES	3.74007e-37	0.57942
METTL14	KDM2A	17152	AP	1.11877e-42	0.613824
METTL14	ZBTB43	87600	AP	1.20879e-44	0.625124
METTL14	TMA16	71020	ES	2.00487e-35	0.567747
METTL14	PMPCB	81177	RI	4.42597e-37	0.578936
METTL14	PUM2	52774	ES	2.65789e-60	0.701195
METTL14	SLC30A5	72302	AT	2.47466e-32	0.545649
METTL14	MCM9	77355	AT	2.11623e-61	0.70576
METTL14	ECHDC1	77467	ES	1.17638e-27	0.50876
METTL14	ABI1	11048	ES	6.25662e-70	0.738427
METTL14	SMAD2	45450	AT	1.45932e-80	0.773268
METTL14	APP	60282	ES	2.96356e-43	0.617187
METTL14	SETD3	29213	AT	1.09988e-40	0.601888
METTL14	GGPS1	10346	AP	1.93778e-41	0.606465
METTL14	ITPR2	20849	AT	3.37656e-33	0.552001
METTL14	HNRNPM	47236	RI	8.58675e-46	0.631516
METTL14	GOSR2	42045	ES	4.53621e-42	0.610236
METTL14	FGFR1OP2	20854	AT	4.65784e-39	0.591756
METTL14	C1orf43	7800	ES	1.64298e-33	0.554265
METTL14	RBBP6	35642	AT	1.01467e-28	0.51756
METTL14	FAM98B	29919	AT	4.51912e-63	0.712535
METTL14	FIP1L1	69315	ES	3.54385e-35	0.566039
METTL14	2022-09-15	3687	ES	2.81417e-46	0.634168
METTL14	WTAP	78310	AP	1.94864e-57	0.68887
METTL14	SRPK2	81282	AT	3.56094e-72	0.746283
METTL14	ARSK	72806	AT	7.68364e-37	0.577344
METTL14	MAX	27934	RI	1.39381e-27	0.508142
METTL14	CNBP	66704	AA	2.82768e-46	0.634156
METTL14	GINS4	83518	ES	2.60123e-31	0.537969
METTL14	FAM175A	69800	AT	2.28217e-54	0.674949
METTL14	ARHGAP11A	29820	RI	6.44143e-28	0.510947
METTL14	RHOA	64857	ES	5.36413e-42	0.609803
METTL14	2022-03-08	11362	ES	2.782e-65	0.721208
METTL14	PIK3C3	45317	AT	2.50642e-27	0.505992
METTL14	CD164	77187	ES	4.02005e-29	0.520819
METTL14	SLC39A1	7767	RI	7.14442e-27	0.502115
METTL14	EPC1	11156	AP	1.67197e-50	0.656256
METTL14	POC1B	23625	AT	1.74632e-50	0.656161
METTL14	THAP6	69530	AT	1.30857e-61	0.706617
METTL14	CHORDC1	18267	RI	2.85307e-29	0.522017
METTL14	ASH1L	8088	ES	4.37571e-78	0.765666
METTL14	PLEKHM2	767	ES	1.2519e-26	0.500019
METTL14	SMG7	9179	AD	1.26654e-44	0.62501
METTL14	SEC23A	27345	AP	1.60943e-51	0.661305
METTL14	RPS6KA5	28834	ES	2.53802e-54	0.674734
METTL14	RCOR3	9708	AT	3.69862e-29	0.521111
METTL14	STX7	77642	AT	2.71248e-80	0.772456
METTL14	TRA2B	68039	ES	1.29871e-64	0.718617
METTL14	CCDC25	83179	ES	6.67148e-35	0.564129
METTL14	TMEM68	83868	AT	4.49332e-36	0.572187
METTL14	ARHGAP11A	29817	AT	6.44143e-28	0.510947
METTL14	CA5B	98313	ES	2.77492e-39	0.593179
METTL14	TM9SF1	26892	AP	5.82421e-37	0.578144
METTL14	ZNF384	19923	ES	1.22879e-83	0.78231
METTL14	USP54	12165	ES	8.40622e-41	0.602602
METTL14	COX11	42569	RI	2.61008e-42	0.611658
METTL14	TTC31	54096	RI	5.89182e-33	0.550239
METTL14	VRK2	53645	ES	1.95581e-40	0.600355
METTL14	OCIAD1	69229	AP	1.64894e-38	0.588254
METTL14	SEC31A	69718	AP	5.45469e-31	0.53551
METTL14	SUPT16H	26572	AT	6.73899e-30	0.527008
METTL14	DNAJC16	765	AT	3.30021e-41	0.605069
METTL14	BCAP29	81361	ES	6.81781e-37	0.577689
METTL14	DUS4L	81343	AD	5.21807e-28	0.511708
METTL14	RC3H2	87484	AT	3.52682e-33	0.551863
METTL14	GPATCH2L	28542	AT	1.17278e-76	0.761148
METTL14	BBS1	17050	ES	1.06542e-27	0.509121
METTL14	TRNT1	62977	AT	9.48727e-28	0.509543
METTL14	OSGIN2	84389	AT	8.41959e-30	0.526244
METTL14	FBXO3	14929	RI	8.80326e-70	0.737898
METTL14	RBFOX2	61985	ES	7.01427e-46	0.631998
METTL14	RIF1	55572	ES	8.37804e-70	0.737974
METTL14	PCMT1	78109	AD	3.16451e-28	0.513507
METTL14	ZFAND1	84309	ES	7.63125e-48	0.642571
METTL14	TUBGCP3	26303	AT	1.43545e-47	0.641118
METTL14	FMR1	90274	ES	1.76955e-43	0.618482
METTL14	TECPR2	29415	AT	5.02464e-60	0.700032
METTL14	STAT3	41034	AA	8.92162e-62	0.707298
METTL14	HECTD2	12516	AT	4.56133e-38	0.585404
METTL14	USP45	77063	AT	3.30914e-33	0.552064
METTL14	ZNF720	36287	RI	1.61063e-28	0.51592
METTL14	RNF14	73849	ES	2.09884e-63	0.713862
METTL14	ISG20L2	8306	RI	3.43287e-65	0.720856
METTL14	CHCHD3	81834	AT	4.46691e-36	0.572204
METTL14	NOLC1	12939	AD	2.13839e-42	0.612169
METTL14	DOCK9	26178	ES	7.95895e-54	0.672406
METTL14	GTF2I	80087	ES	8.01925e-73	0.748497
METTL14	ZXDC	66597	AT	4.48488e-36	0.572192
METTL14	PFKM	21423	RI	5.38383e-50	0.653697
METTL14	VPS8	67977	ES	2.94536e-39	0.593015
METTL14	HNRNPC	26559	AA	2.67247e-37	0.580384
METTL14	RELA	16898	RI	6.17623e-29	0.519312
METTL14	SYNE2	27846	ES	2.95385e-36	0.57342
METTL14	GTF2H1	14599	AP	1.01775e-55	0.681172
METTL14	NUMB	28287	AP	1.82085e-70	0.740329
METTL14	ADD3	13075	AP	9.53897e-32	0.541268
METTL14	YPEL5	53096	AD	1.12494e-30	0.533087
METTL14	GLG1	37565	RI	5.44747e-30	0.527737
METTL14	TMEM237	56847	AP	9.93235e-29	0.517636
METTL14	ACADM	3483	AT	9.54357e-51	0.657475
METTL14	SLC39A1	7764	AP	7.14442e-27	0.502115
METTL14	CEP57	18390	AT	9.55478e-58	0.690232
METTL14	PPFIA1	17393	AT	8.88494e-28	0.509781
METTL14	NIF3L1	56774	AA	1.86236e-32	0.546564
METTL14	FAM21A	11559	ES	1.1478e-55	0.680935
METTL14	POLDIP3	62521	AT	7.82342e-41	0.602792
METTL14	PHF12	40025	RI	3.33244e-31	0.537149
METTL14	NIF3L1	56777	AD	1.86236e-32	0.546564
METTL14	UBP1	63866	ES	1.00551e-62	0.711142
METTL14	UEVLD	14667	AT	6.80237e-77	0.761903
METTL14	UCHL5	9246	ES	2.24958e-46	0.634697
METTL14	KIF13A	75458	ES	7.13609e-35	0.563925
METTL14	C11orf57	18723	RI	7.89977e-56	0.681673
METTL14	SEC24C	12178	ES	3.79396e-52	0.664374
METTL14	NPHP3	66811	AT	4.8305e-29	0.520176
METTL14	OSGIN2	84387	AP	8.41959e-30	0.526244
METTL14	ERCC4	34064	AT	8.71749e-83	0.77985
METTL14	MBP	45841	AT	1.5511e-32	0.547151
METTL14	CREBZF	18136	RI	1.96443e-38	0.587766
METTL14	BPNT1	9867	AD	2.7814e-45	0.628693
METTL14	STAMBP	53990	RI	1.01504e-45	0.631116
METTL14	NUP62	51127	RI	3.05336e-39	0.592917
METTL14	DIMT1	72182	AT	8.47237e-54	0.672278
METTL14	FAM104A	43210	ES	3.59577e-37	0.579533
METTL14	SERBP1	3354	AA	5.28177e-45	0.627141
METTL14	PIGV	1303	AD	1.37972e-33	0.554811
METTL14	MRPL42	23699	RI	8.94737e-28	0.509756
METTL14	TSR1	38387	AT	3.51811e-46	0.633639
METTL14	CASP2	82099	AT	5.15279e-29	0.519949
METTL14	IFNAR1	60399	AP	4.45229e-45	0.627555
METTL14	DCAF10	86447	ES	6.68369e-49	0.648098
METTL14	MRPL42	23697	AT	8.94737e-28	0.509756
METTL14	MPP5	28044	AT	2.60071e-78	0.766372
METTL14	CUL1	82147	AP	7.13155e-43	0.614969
METTL14	ZNF550	52294	ES	4.00638e-27	0.504262
METTL14	PHF12	40026	RI	3.33244e-31	0.537149
METTL14	OCIAD1	69237	AD	1.64894e-38	0.588254
METTL14	CAMKK2	24854	ES	2.07359e-36	0.574456
METTL14	MBD1	45501	AT	2.78856e-39	0.593165
METTL14	RACGAP1	21630	AD	1.01749e-28	0.51755
METTL14	OXR1	84842	AP	1.97665e-34	0.560822
METTL14	CUL2	11218	AP	1.12308e-76	0.761208
METTL14	USP33	3533	AA	1.18151e-32	0.548023
METTL14	MRPL35	54419	RI	4.05886e-29	0.520786
METTL14	LYRM2	77013	AD	4.55065e-65	0.720383
METTL14	GDAP2	4377	AT	1.21018e-43	0.619432
METTL14	PACRGL	68924	AD	9.06955e-41	0.6024
METTL14	PPHLN1	21227	ES	6.51265e-49	0.648156
METTL14	CNOT7	82785	AT	1.73738e-58	0.693459
METTL14	RBM41	89818	ES	1.09337e-61	0.706937
METTL14	C6orf106	75787	ES	1.37235e-30	0.532418
METTL14	MED1	40644	AT	8.64194e-57	0.685999
METTL14	PRKDC	83791	ES	5.83992e-62	0.708049
METTL14	EIF5	29443	RI	7.43777e-56	0.681791
METTL14	YPEL5	53106	ES	1.12494e-30	0.533087
METTL14	CGGBP1	65668	AA	3.89806e-51	0.659409
METTL14	IRF2BP2	10338	AD	3.85509e-59	0.696274
METTL14	ELF2	70614	AA	7.10691e-84	0.782991
METTL14	MBD4	66717	AT	1.7975e-40	0.60058
METTL14	BTBD10	14453	ES	1.34304e-72	0.747734
METTL14	PSME3	41149	ES	1.09382e-69	0.73756
METTL14	CASP8	56831	AD	3.57484e-34	0.559002
METTL14	CEP135	69337	AT	2.74456e-46	0.634227
METTL14	ELF2	70610	AP	7.10691e-84	0.782991
METTL14	GOLGA7	83513	AA	9.59126e-39	0.58976
METTL14	WDR33	55244	AT	8.63422e-49	0.647522
METTL14	FBXO22	31899	AT	6.0774e-30	0.527363
METTL14	RBM48	80441	RI	3.70307e-59	0.696349
METTL14	FBXL20	40641	AT	2.30512e-28	0.514642
METTL14	GGA2	35589	AA	3.46257e-39	0.592571
METTL14	LZIC	587	AP	2.34774e-32	0.545819
METTL14	COG5	81337	AT	8.15724e-68	0.730755
METTL14	HNRNPUL1	50035	AA	9.14541e-36	0.570086
METTL14	CHM	89563	AT	7.08808e-56	0.681886
METTL14	PTP4A2	1523	ES	4.26103e-28	0.512438
METTL14	NUP43	78098	RI	5.9678e-37	0.578074
METTL14	SNX3	77149	AD	4.73393e-28	0.512059
METTL14	CSNK1A1	74045	AD	5.83123e-52	0.663465
METTL14	RREB1	75253	ES	6.84451e-55	0.677377
METTL14	SRSF7	53279	RI	8.50323e-33	0.549072
METTL14	UBE2G2	60831	ES	1.34552e-44	0.624862
METTL14	NAP1L4	13939	ES	1.77252e-27	0.507263
METTL14	U2SURP	67124	ES	4.96125e-27	0.50347
METTL14	CALM3	50568	ES	3.44682e-35	0.566122
METTL14	CKAP2	26001	AT	3.52269e-31	0.536965
METTL14	RTFDC1	59880	AT	4.93913e-37	0.57862
METTL14	CARM1	47597	RI	1.31864e-42	0.613405
METTL14	DDX20	4189	RI	7.19452e-49	0.647932
METTL14	ADNP	59788	AP	8.13219e-68	0.73076
METTL14	SF1	16681	AA	8.54557e-77	0.761587
METTL14	LGALS8	10382	ES	7.2996e-29	0.518723
METTL14	UBE2D2	73622	ES	2.49015e-39	0.593475
METTL14	NIP7	37283	ES	7.82789e-30	0.526494
METTL14	FPGT	3452	ES	5.41107e-54	0.673194
METTL14	NDE1	34185	AT	1.76318e-58	0.693431
METTL14	TSPAN31	22724	AT	4.54682e-29	0.520388
METTL14	KLHL5	69042	AT	7.97199e-30	0.526432
METTL14	RPS6KC1	9781	RI	1.34859e-58	0.693935
METTL14	ATP11C	90245	ES	9.62736e-41	0.602242
METTL14	RCOR3	9709	ES	3.69862e-29	0.521111
METTL14	RNF13	67242	ES	1.5364e-50	0.65644
METTL14	SUV420H1	17294	AT	2.97394e-36	0.5734
METTL14	ZMYND11	10585	AT	1.86527e-44	0.624061
METTL14	KIF16B	58720	AT	2.5759e-58	0.692717
METTL14	NCBP2	68267	AD	2.3617e-27	0.50621
METTL14	MBLAC2	72766	AT	6.24566e-44	0.621078
METTL14	ARID1A	1297	ES	4.0405e-67	0.728176
METTL14	SENP6	76797	ES	2.38123e-55	0.679487
METTL14	SYNRG	40526	ES	2.47944e-61	0.705477
METTL14	SEC22C	64290	AT	3.41052e-37	0.579685
METTL14	NCBP2	68270	AD	2.3617e-27	0.50621
METTL14	HEATR5B	100123	ES	7.02821e-56	0.681903
METTL14	KDM2B	24879	RI	1.53175e-33	0.554484
METTL14	HNRNPM	94942	ES	8.58675e-46	0.631516
METTL14	TANK	55733	AT	6.87501e-38	0.584247
METTL14	ZNF669	10511	ES	9.23711e-43	0.614312
METTL14	NUP62	51123	RI	3.05336e-39	0.592917
METTL14	TAF1A	9883	AT	1.58939e-63	0.714342
METTL14	HUS1	79616	RI	2.38217e-44	0.62346
METTL14	POM121C	80119	AP	2.49257e-41	0.605806
METTL14	GART	60430	AT	6.33354e-52	0.66329
METTL14	ARSB	72614	AT	2.9163e-32	0.545119
METTL14	FAM91A1	85069	AT	1.81254e-54	0.675416
METTL14	CLDND1	65783	ES	1.96224e-29	0.52332
METTL14	TNFAIP1	39886	ES	4.71483e-32	0.543564
METTL14	ODF2	87749	AP	2.41887e-27	0.506122
METTL14	SCAF11	21316	AP	1.10522e-49	0.65211
METTL14	INTS12	70247	AP	2.16343e-71	0.743573
METTL14	FAM60A	20982	AP	3.26042e-35	0.566289
METTL14	EIF4A2	68054	ES	7.08262e-36	0.570843
METTL14	EXOC7	43561	AT	6.02487e-37	0.578047
METTL14	ATXN7L3	41826	AA	1.0604e-27	0.509138
METTL14	ZNF587	52349	AP	6.73242e-30	0.527012
METTL14	PRKAG1	21510	AD	2.18175e-39	0.593837
METTL14	EHHADH	67978	AT	5.35601e-29	0.519813
METTL14	PDCD10	67560	ES	1.77568e-53	0.670759
METTL14	GSKIP	29199	AD	1.6516e-45	0.629948
METTL14	NCOR2	25148	ES	4.91781e-32	0.543428
METTL14	SIAH1	36342	AT	3.37933e-30	0.529367
METTL14	BROX	9895	AP	2.73664e-40	0.599456
METTL14	IST1	37517	ES	1.11736e-28	0.517219
METTL14	PEX19	8457	ES	2.50552e-33	0.552941
METTL14	C1orf131	10272	RI	5.29114e-36	0.571705
METTL14	MBNL2	26144	ES	3.27708e-36	0.573115
METTL14	ARID1A	1296	AA	4.0405e-67	0.728176
METTL14	SMARCC2	22393	ES	7.49621e-65	0.719544
METTL14	BCLAF1	77906	ES	2.13983e-94	0.810845
METTL14	ZC3HAV1	81940	AT	1.32419e-29	0.524683
METTL14	SLC39A6	45208	AT	2.00258e-37	0.58121
METTL14	PMPCB	81180	ES	4.42597e-37	0.578936
METTL14	PIAS3	7292	RI	2.57666e-29	0.522373
METTL14	UBAP2L	7814	AT	1.54834e-27	0.507758
METTL14	MAP4K4	54754	ES	8.22466e-27	0.50159
METTL14	NUP133	10222	AT	6.49975e-38	0.584406
METTL14	GID4	39539	AT	8.50777e-33	0.549071
METTL14	CALU	81714	ES	1.40595e-33	0.554752
METTL14	UBE2D3	70141	AD	2.53492e-89	0.797957
METTL14	BLZF1	8916	AT	9.98383e-58	0.690148
METTL14	ZFAND1	84308	ES	7.63125e-48	0.642571
METTL14	UHRF2	85821	ES	3.89906e-29	0.520926
METTL14	NIPA2	29683	ES	9.90591e-55	0.676634
METTL14	UBE2G2	60833	ES	1.34552e-44	0.624862
METTL14	EIF4H	80063	ES	4.77346e-59	0.695876
METTL14	HN1L	33123	ES	1.04797e-38	0.589515
METTL14	SLC24A1	31232	AT	2.33637e-35	0.567289
METTL14	BBS1	17047	RI	1.06542e-27	0.509121
METTL14	PRRC2B	87935	ES	6.49405e-67	0.727405
METTL14	RELL1	69002	AT	9.36202e-56	0.681337
METTL14	LRCH3	68318	AT	2.21833e-61	0.705676
METTL14	SPG20	25639	AP	1.24603e-47	0.641444
METTL14	TTC31	54077	RI	5.89182e-33	0.550239
METTL14	FAM173B	71547	ES	1.03018e-29	0.525549
METTL14	2022-09-15	3688	ES	2.81417e-46	0.634168
METTL14	ARL5A	55593	AT	3.16194e-67	0.728573
METTL14	WDR11	13288	RI	1.22229e-46	0.636133
METTL14	PPP2R1B	18672	AT	3.59285e-38	0.586075
METTL14	BBS7	70509	AT	1.08851e-30	0.533198
METTL14	PHC3	67600	AT	5.52145e-65	0.720059
METTL14	ZBTB44	19493	RI	3.14267e-42	0.611181
METTL14	BOD1L1	68797	ES	3.46955e-70	0.739338
METTL14	NPEPPS	42078	AT	9.1271e-56	0.681388
METTL14	ZNF664	25126	ES	3.76593e-33	0.551656
METTL14	C9orf72	86052	AT	4.88173e-29	0.520139
METTL14	NFE2L2	56134	RI	1.16856e-45	0.630778
METTL14	FAM13B	73499	ES	9.01604e-35	0.563216
METTL14	ZCCHC9	72663	RI	3.8645e-43	0.616519
METTL14	APPL2	24126	AP	2.37675e-46	0.634567
METTL14	SLC38A1	21328	AD	8.46436e-35	0.563408
METTL14	UBE2N	23691	AD	5.09833e-48	0.643494
METTL14	MBNL2	26142	ES	3.27708e-36	0.573115
METTL14	BSDC1	1591	RI	2.35367e-48	0.645255
METTL14	PPIG	55871	AT	1.3701e-58	0.693905
METTL14	PCNT	60937	ES	8.35611e-27	0.501531
METTL14	TMEM106B	78803	AT	3.76571e-63	0.712851
METTL14	CPSF6	23304	ES	7.56214e-47	0.637259
METTL14	SEC31A	69735	AD	5.45469e-31	0.53551
METTL14	KLHL21	482	RI	4.84163e-27	0.503561
METTL14	RBM23	26653	ES	1.2584e-54	0.676152
METTL14	RHOT1	40180	ES	3.88717e-47	0.638811
METTL14	SEC31A	69733	ES	5.45469e-31	0.53551
METTL14	ARHGEF11	8338	ES	4.43101e-36	0.572228
METTL14	GTF2H2C	72388	AT	2.74698e-51	0.660161
METTL14	OXR1	84849	AT	1.97665e-34	0.560822
METTL14	NIN	27495	ES	1.98316e-42	0.612362
METTL14	TEFM	40128	AA	1.27439e-29	0.524815
METTL14	CPSF7	16198	AD	2.51594e-55	0.679377
METTL14	SLMAP	65391	AT	2.72693e-51	0.660176
METTL14	UHRF2	85819	AT	3.89906e-29	0.520926
METTL14	PTP4A2	1518	ES	4.26103e-28	0.512438
METTL14	TADA2A	40518	AT	8.86282e-32	0.541509
METTL14	PCSK7	18902	RI	6.26378e-29	0.519263
METTL14	GLYR1	33866	ES	1.08424e-52	0.667005
METTL14	KLF3	69021	AT	5.71722e-42	0.609638
METTL14	RNPC3	3907	AA	1.74773e-44	0.624221
METTL14	LARP4	21700	AT	8.46265e-63	0.711443
METTL14	POM121	79925	AP	5.54296e-72	0.745622
METTL14	PMS2	78701	ES	5.66409e-58	0.691226
METTL14	HGSNAT	83760	AP	2.41235e-28	0.514479
METTL14	SYPL1	81328	ES	3.76748e-33	0.551655
METTL14	PRKAR1A	43143	AP	2.07542e-82	0.778751
METTL14	CARM1	47600	ES	1.31864e-42	0.613405
METTL14	MAPK9	75007	AA	2.29658e-66	0.725341
METTL14	ETNK1	20739	AT	6.60365e-41	0.603241
METTL14	STXBP4	42571	AT	2.30759e-38	0.587316
METTL14	DOCK9	26175	AT	7.95895e-54	0.672406
METTL14	OSBPL9	2975	AD	2.89426e-48	0.644785
METTL14	OSBPL9	2974	ES	2.89426e-48	0.644785
METTL14	GALNT7	71173	AA	9.45532e-27	0.50107
METTL14	SMG7	9178	ES	1.26654e-44	0.62501
METTL14	PSMD2	67871	AD	6.19041e-37	0.577968
METTL14	SPRTN	10277	RI	6.97987e-63	0.711779
METTL14	EIF4ENIF1	61857	AA	5.53544e-40	0.597561
METTL14	NFAT5	37289	AT	1.11976e-56	0.685497
METTL14	FAM49B	85146	ES	7.66484e-29	0.518551
METTL14	FAM204A	13247	ES	4.35713e-39	0.59194
METTL14	ST7	81563	ES	3.5417e-32	0.544492
METTL14	SREBF2	62464	ES	1.01144e-32	0.548519
METTL14	AP2B1	40319	ES	1.24002e-35	0.569181
METTL14	NPEPPS	42075	AP	9.1271e-56	0.681388
METTL14	PMPCB	81174	AT	4.42597e-37	0.578936
METTL14	ALG10	21064	AT	2.67056e-59	0.696955
METTL14	KDM4C	85833	ES	8.37645e-52	0.662697
METTL14	MEAF6	1804	ES	6.18753e-39	0.590973
METTL14	TP53BP2	9930	ES	3.27789e-73	0.749814
METTL14	QKI	78405	AT	6.63686e-66	0.723591
METTL14	SDHD	18732	AT	2.41644e-44	0.623425
METTL14	ANO6	21297	AT	1.17934e-49	0.651966
METTL14	KIAA1328	45278	AP	4.02002e-31	0.536526
METTL14	CCDC50	68126	ES	5.43606e-34	0.557708
METTL14	WDR41	72586	ES	1.0748e-36	0.576371
METTL14	TJP1	29766	ES	4.06776e-65	0.720572
METTL14	TNKS	82596	AT	1.61453e-50	0.656332
METTL14	AZI2	63795	AA	8.86408e-62	0.70731
METTL14	CAPRIN1	14941	AP	1.4722e-52	0.666365
METTL14	CAST	72838	AP	2.02027e-28	0.515113
METTL14	SAR1B	73417	AD	6.82929e-51	0.658199
METTL14	BRD4	48069	AT	5.79675e-46	0.632453
METTL14	MBD4	66724	ES	1.7975e-40	0.60058
METTL14	TOM1L1	42543	AA	1.62305e-34	0.561425
METTL14	RAP1B	22959	AD	3.19287e-30	0.52956
METTL14	PPP1CC	24501	AT	8.13249e-41	0.602689
METTL14	RNF111	30928	AA	2.79969e-71	0.743183
METTL14	PEX26	61023	ES	1.98905e-54	0.675228
METTL14	DDX46	73426	ES	1.57986e-94	0.811167
METTL14	NBPF15	7397	ES	7.78428e-27	0.501796
METTL14	UQCRC2	35524	ES	2.58475e-28	0.514232
METTL14	CTNND1	15932	RI	1.64758e-42	0.612837
METTL14	MSH2	53497	AT	1.25958e-39	0.595334
METTL14	ZNF585B	49465	ES	2.3374e-33	0.553159
METTL14	CDC42	1006	ES	2.12885e-51	0.660707
METTL14	REV1	54712	RI	1.68758e-39	0.594538
METTL14	R3HDM1	55443	ES	2.30033e-49	0.650483
METTL14	CHMP3	54438	AP	4.72925e-47	0.638355
METTL14	RPRD2	7471	RI	2.44282e-62	0.709587
METTL14	WAC	11105	ES	5.53735e-88	0.79439
METTL14	RPS6KA5	28832	AT	2.53802e-54	0.674734
METTL14	C12orf43	24819	ES	3.3481e-37	0.579738
METTL14	KCTD20	75982	ES	9.23088e-49	0.647372
METTL14	STAG1	66931	AT	1.3147e-81	0.77639
METTL14	NBR1	41694	AT	3.33086e-73	0.74979
METTL14	RQCD1	57493	AT	5.76452e-48	0.643213
METTL14	FAM104A	43211	AA	3.59577e-37	0.579533
METTL14	BCL2L13	60999	AD	5.74734e-54	0.673071
METTL14	ATP5SL	50072	AA	3.74456e-27	0.504512
METTL14	SRSF3	75983	AT	5.68083e-82	0.777467
METTL14	YLPM1	28429	ES	2.52493e-70	0.739827
METTL14	GTF2H2C	72391	ES	2.74698e-51	0.660161
METTL14	AP3S2	32455	ES	6.39221e-78	0.765151
METTL14	DDX20	4190	RI	7.19452e-49	0.647932
METTL14	SRRM1	1128	ES	2.78053e-56	0.683724
METTL14	SRP68	43547	AP	4.66154e-29	0.5203
METTL15	ATP2A2	24418	RI	1.83264e-30	0.531442
METTL15	CSDE1	4336	ES	7.06925e-27	0.502155
METTL15	HNRNPA2B1	318763	ES	1.67381e-35	0.568287
METTL15	AZI2	63794	AT	3.12472e-31	0.537362
METTL15	HNRNPA2B1	79038	AA	1.67381e-35	0.568287
METTL15	FUBP1	3546	ES	2.96247e-28	0.513744
METTL15	TRMT11	77431	AT	1.29883e-37	0.582443
METTL15	DNAJC14	22260	AP	5.53858e-29	0.519695
METTL15	C2CD5	20733	ES	3.55937e-28	0.513085
METTL15	PCNP	65963	AA	8.89752e-41	0.602451
METTL15	NUMB	28288	ES	2.12108e-35	0.567579
METTL15	RIC8A	13590	AA	1.51378e-41	0.60711
METTL15	SEH1L	44727	AA	1.73365e-32	0.546794
METTL15	ALS2	56917	AT	8.435e-31	0.534053
METTL15	SYNCRIP	76934	AT	1.85445e-34	0.561017
METTL15	CSNK1G3	73145	ES	7.3507e-35	0.563835
METTL15	BRD3	88089	AT	8.48987e-27	0.501472
METTL15	POM121	79927	AT	2.2415e-28	0.514742
METTL15	SLAIN2	69214	ES	2.81603e-31	0.537707
METTL15	UBE2D3	70130	ES	1.2253e-37	0.582609
METTL15	G3BP2	69550	ES	5.36856e-37	0.578379
METTL15	CELF1	15763	AA	1.53836e-47	0.640958
METTL15	HNRNPDL	69705	ES	4.15044e-28	0.512533
METTL15	NPM1	74519	AT	1.53551e-27	0.507788
METTL15	FBXO5	78210	AP	5.46836e-31	0.535502
METTL15	ZC3H7A	34033	AP	6.50391e-27	0.502465
METTL15	ZNF207	40205	ES	5.6697e-29	0.519613
METTL15	RPP14	65434	AD	3.19965e-30	0.529553
METTL15	THAP9	69749	ES	1.56227e-27	0.507725
METTL15	USO1	69551	ES	1.01656e-28	0.517553
METTL15	SET	87776	AP	6.27976e-36	0.571199
METTL15	UCHL5	9240	AT	1.52176e-28	0.516122
METTL15	SUCLA2	25849	AP	4.00139e-28	0.512665
METTL15	TMPO	23849	ES	1.39747e-27	0.508132
METTL15	ING3	81586	AT	6.61049e-27	0.502404
METTL15	RABGEF1	79898	ES	3.72415e-27	0.504532
METTL15	NIN	27492	AT	2.15105e-27	0.506553
METTL15	CEP78	86655	AT	7.79588e-27	0.50179
METTL15	NAF1	71008	AT	4.47056e-33	0.551114
METTL15	MORF4L2	89764	AP	1.35946e-28	0.516523
METTL15	FXR1	67746	ES	5.34924e-34	0.557757
METTL15	ZBTB1	27892	AT	2.09767e-30	0.530985
METTL15	VRK2	53646	ES	3.40715e-29	0.521398
METTL15	TAF5L	10228	AT	1.32033e-28	0.516627
METTL15	CEP78	86657	ES	7.79588e-27	0.50179
METTL15	KIF1B	602	AT	1.57008e-28	0.516011
METTL15	CSNK1A1	74047	ES	1.52421e-28	0.516116
METTL15	C16orf52	35532	AT	6.68812e-27	0.502361
METTL15	KDM4C	85823	AP	1.72048e-39	0.594485
METTL15	HP1BP3	937	AP	3.75008e-30	0.529012
METTL15	TERF1	84141	ES	7.05068e-31	0.534653
METTL15	MBNL1	67324	ES	7.92734e-27	0.501728
METTL15	BLOC1S6	30431	AT	2.13784e-28	0.514911
METTL15	PIP5K1A	7580	ES	9.65299e-28	0.50948
METTL15	MAP3K7	77020	ES	3.29786e-33	0.552075
METTL15	ASCC3	77092	AT	3.36285e-35	0.566196
METTL15	PCNP	65960	ES	8.89752e-41	0.602451
METTL15	ZBTB43	87600	AP	7.03365e-32	0.542263
METTL15	PUM2	52774	ES	5.69758e-27	0.502957
METTL15	MCM9	77355	AT	2.23358e-30	0.530773
METTL15	ABI1	11048	ES	1.96042e-32	0.546399
METTL15	SMAD2	45450	AT	1.20238e-37	0.582663
METTL15	FAM98B	29919	AT	2.384e-27	0.506176
METTL15	WTAP	78310	AP	7.14655e-35	0.563921
METTL15	ARSK	72806	AT	3.28107e-30	0.529467
METTL15	CNBP	66704	AA	5.06802e-32	0.54333
METTL15	2022-03-08	11362	ES	5.20042e-30	0.527896
METTL15	POC1B	23625	AT	1.04893e-29	0.525487
METTL15	THAP6	69530	AT	1.16248e-33	0.555346
METTL15	ASH1L	8088	ES	2.92359e-31	0.537582
METTL15	RPS6KA5	28834	ES	1.06397e-26	0.500628
METTL15	STX7	77642	AT	4.84204e-36	0.571966
METTL15	TRA2B	68039	ES	4.25677e-36	0.572346
METTL15	ZNF384	19923	ES	1.39924e-30	0.532353
METTL15	COX11	42569	RI	2.44606e-29	0.522554
METTL15	VRK2	53645	ES	3.40715e-29	0.521398
METTL15	RC3H2	87484	AT	3.0713e-28	0.513615
METTL15	GPATCH2L	28542	AT	3.71943e-32	0.544333
METTL15	FBXO3	14929	RI	2.75588e-57	0.688205
METTL15	RIF1	55572	ES	1.75072e-39	0.594438
METTL15	ZFAND1	84309	ES	6.24298e-27	0.502617
METTL15	TUBGCP3	26303	AT	8.62174e-32	0.541599
METTL15	FMR1	90274	ES	1.21191e-27	0.508652
METTL15	STAT3	41034	AA	1.37012e-29	0.524565
METTL15	USP45	77063	AT	8.0531e-31	0.534208
METTL15	ISG20L2	8306	RI	2.4892e-27	0.506017
METTL15	HNRNPC	26559	AA	1.56788e-29	0.524098
METTL15	GTF2H1	14599	AP	1.67079e-63	0.714256
METTL15	NUMB	28287	AP	2.12108e-35	0.567579
METTL15	ACADM	3483	AT	2.23213e-27	0.506418
METTL15	CEP57	18390	AT	7.20893e-40	0.596848
METTL15	FAM21A	11559	ES	2.1803e-28	0.514841
METTL15	UEVLD	14667	AT	1.87905e-61	0.705972
METTL15	UCHL5	9246	ES	1.52176e-28	0.516122
METTL15	C11orf57	18723	RI	8.22989e-28	0.510059
METTL15	ERCC4	34064	AT	1.25986e-39	0.595334
METTL15	DIMT1	72182	AT	1.03827e-30	0.533356
METTL15	SERBP1	3354	AA	6.11116e-28	0.511137
METTL15	TSR1	38387	AT	2.28724e-29	0.522787
METTL15	DCAF10	86447	ES	2.03481e-33	0.553594
METTL15	MPP5	28044	AT	3.12909e-31	0.537357
METTL15	CUL2	11218	AP	9.68371e-33	0.548658
METTL15	LYRM2	77013	AD	4.52336e-30	0.528373
METTL15	PPHLN1	21227	ES	2.51886e-29	0.522452
METTL15	RBM41	89818	ES	8.31685e-36	0.570367
METTL15	PRKDC	83791	ES	7.4323e-30	0.526672
METTL15	ELF2	70614	AA	3.10178e-35	0.566439
METTL15	BTBD10	14453	ES	6.21426e-54	0.672912
METTL15	ELF2	70610	AP	3.10178e-35	0.566439
METTL15	WDR33	55244	AT	4.01892e-29	0.52082
METTL15	COG5	81337	AT	3.883e-29	0.520941
METTL15	CHM	89563	AT	1.85754e-41	0.606575
METTL15	CSNK1A1	74045	AD	1.52421e-28	0.516116
METTL15	RREB1	75253	ES	1.22207e-27	0.508622
METTL15	NAP1L4	13939	ES	3.41417e-40	0.598862
METTL15	DDX20	4189	RI	6.93579e-27	0.502226
METTL15	SF1	16681	AA	4.71891e-33	0.550943
METTL15	FPGT	3452	ES	1.97623e-27	0.506864
METTL15	NDE1	34185	AT	2.84139e-33	0.552545
METTL15	MBLAC2	72766	AT	6.32469e-30	0.527226
METTL15	ARID1A	1297	ES	1.25687e-26	0.500004
METTL15	SENP6	76797	ES	1.58095e-34	0.561505
METTL15	TAF1A	9883	AT	2.2821e-31	0.538402
METTL15	FAM91A1	85069	AT	8.82463e-27	0.501328
METTL15	INTS12	70247	AP	6.8014e-40	0.597005
METTL15	PDCD10	67560	ES	3.56452e-30	0.529185
METTL15	GSKIP	29199	AD	1.90437e-28	0.515324
METTL15	ARID1A	1296	AA	1.25687e-26	0.500004
METTL15	BCLAF1	77906	ES	3.21172e-36	0.573174
METTL15	UBE2D3	70141	AD	1.2253e-37	0.582609
METTL15	BLZF1	8916	AT	9.34105e-32	0.541337
METTL15	ZFAND1	84308	ES	6.24298e-27	0.502617
METTL15	UHRF2	85821	ES	1.2677e-33	0.555075
METTL15	EIF4H	80063	ES	6.03595e-33	0.550162
METTL15	PRRC2B	87935	ES	3.8051e-32	0.544259
METTL15	RELL1	69002	AT	1.34133e-28	0.516571
METTL15	LRCH3	68318	AT	2.44473e-34	0.56017
METTL15	PHC3	67600	AT	5.12717e-29	0.519966
METTL15	BOD1L1	68797	ES	4.18011e-34	0.558519
METTL15	C9orf72	86052	AT	2.1347e-29	0.523027
METTL15	ZCCHC9	72663	RI	5.29776e-33	0.550576
METTL15	PPIG	55871	AT	3.0145e-27	0.505312
METTL15	TMEM106B	78803	AT	3.8481e-28	0.512805
METTL15	RHOT1	40180	ES	1.17407e-27	0.508768
METTL15	GTF2H2C	72388	AT	1.89839e-37	0.581362
METTL15	NIN	27495	ES	2.15105e-27	0.506553
METTL15	CPSF7	16198	AD	5.4499e-32	0.543094
METTL15	UHRF2	85819	AT	1.2677e-33	0.555075
METTL15	GLYR1	33866	ES	1.1905e-26	0.500207
METTL15	LARP4	21700	AT	1.50815e-31	0.539766
METTL15	POM121	79925	AP	2.2415e-28	0.514742
METTL15	PMS2	78701	ES	3.32364e-31	0.537158
METTL15	PRKAR1A	43143	AP	9.55576e-30	0.525808
METTL15	MAPK9	75007	AA	3.22155e-36	0.573165
METTL15	SPRTN	10277	RI	1.98399e-28	0.515177
METTL15	ALG10	21064	AT	5.90719e-28	0.51126
METTL15	KDM4C	85833	ES	1.72048e-39	0.594485
METTL15	TP53BP2	9930	ES	2.09282e-28	0.514987
METTL15	QKI	78405	AT	1.47056e-28	0.516244
METTL15	AZI2	63795	AA	3.12472e-31	0.537362
METTL15	CAPRIN1	14941	AP	2.0423e-59	0.697452
METTL15	SAR1B	73417	AD	7.78249e-27	0.501796
METTL15	RNF111	30928	AA	9.11073e-28	0.50969
METTL15	DDX46	73426	ES	1.10153e-39	0.595699
METTL15	R3HDM1	55443	ES	1.04106e-26	0.50071
METTL15	WAC	11105	ES	4.03445e-36	0.572504
METTL15	RPS6KA5	28832	AT	1.06397e-26	0.500628
METTL15	STAG1	66931	AT	7.64972e-39	0.590387
METTL15	NBR1	41694	AT	3.05661e-27	0.505261
METTL15	SRSF3	75983	AT	8.70774e-37	0.576981
METTL15	YLPM1	28429	ES	5.38584e-30	0.527776
METTL15	GTF2H2C	72391	ES	1.89839e-37	0.581362
METTL15	DDX20	4190	RI	6.93579e-27	0.502226
METTL15	SRRM1	1128	ES	2.82945e-28	0.513909
WTAP	ATP2A2	24418	RI	7.91766e-43	0.614703
WTAP	ZNF318	76265	AT	1.11966e-33	0.555463
WTAP	NAP1L1	23471	AT	3.12939e-28	0.513547
WTAP	CSDE1	4336	ES	1.65244e-40	0.600805
WTAP	HNRNPA2B1	318763	ES	4.97528e-48	0.64355
WTAP	PCBP2	213888	ES	3.55199e-45	0.628102
WTAP	CAMKK2	24853	ES	3.12784e-28	0.513549
WTAP	WHSC1	68527	AT	1.53565e-29	0.52417
WTAP	SPAG9	42494	ES	2.18381e-32	0.546052
WTAP	CLDND1	65752	AT	6.79321e-31	0.534778
WTAP	SNRNP200	563711	ES	1.45067e-27	0.507996
WTAP	AZI2	63794	AT	1.43135e-46	0.635762
WTAP	H2AFY	73442	AP	3.81961e-31	0.536696
WTAP	HNRNPA2B1	79038	AA	4.97528e-48	0.64355
WTAP	IPO11	72191	AT	9.42418e-38	0.583354
WTAP	PPP3CB	12153	AT	6.43451e-36	0.571127
WTAP	FUBP1	3546	ES	6.67814e-36	0.571017
WTAP	BOD1	74584	ES	1.66413e-33	0.554225
WTAP	DDX23	21484	ES	2.93471e-43	0.617212
WTAP	TRMT11	77431	AT	5.27443e-52	0.663678
WTAP	WDPCP	53729	AT	5.90874e-28	0.511259
WTAP	DNAJC14	22260	AP	7.7879e-40	0.596639
WTAP	C2CD5	20733	ES	1.35244e-27	0.508252
WTAP	PCNP	65963	AA	1.67166e-44	0.62433
WTAP	PARP11	19762	AT	3.92665e-28	0.512732
WTAP	NCOR2	25143	AD	2.52987e-27	0.505957
WTAP	CAMKK2	24851	AT	3.12784e-28	0.513549
WTAP	NUMB	28288	ES	1.61373e-41	0.606943
WTAP	ABCF2	82355	AT	3.37966e-36	0.573025
WTAP	FIP1L1	69310	AT	9.34962e-29	0.51785
WTAP	RIC8A	13590	AA	2.00509e-32	0.546327
WTAP	BSDC1	1590	AT	9.38439e-34	0.556013
WTAP	UVRAG	17878	AP	4.67438e-33	0.550973
WTAP	RAN	25206	ES	4.12837e-36	0.572436
WTAP	SEH1L	44727	AA	2.39757e-37	0.580695
WTAP	DPM1	95975	ES	8.54549e-30	0.526193
WTAP	TCF20	62501	ES	6.30721e-33	0.550023
WTAP	ALS2	56917	AT	4.05972e-34	0.55861
WTAP	SYNCRIP	76934	AT	9.09067e-73	0.748311
WTAP	CSNK1G3	73145	ES	5.14361e-40	0.597759
WTAP	FIP1L1	69313	ES	9.34962e-29	0.51785
WTAP	TANK	55730	AP	1.33094e-27	0.50831
WTAP	MAPKAPK2	9592	AA	3.25554e-33	0.552116
WTAP	NFATC3	37186	ES	6.90691e-36	0.570917
WTAP	APP	60283	ES	4.09374e-34	0.558584
WTAP	PIGX	68257	AT	3.8877e-27	0.504373
WTAP	POM121	79927	AT	2.53896e-37	0.580531
WTAP	SLAIN2	69214	ES	9.38084e-39	0.589822
WTAP	TPM4	48125	AP	4.64834e-27	0.503712
WTAP	CLSPN	1731	AT	4.9526e-27	0.503477
WTAP	SRSF2	43661	RI	6.75076e-31	0.534799
WTAP	SMAP1	76647	ES	1.56092e-41	0.60703
WTAP	UBE2D3	70130	ES	1.93647e-53	0.67058
WTAP	G3BP2	69550	ES	3.82645e-40	0.598556
WTAP	SRSF2	43662	RI	6.75076e-31	0.534799
WTAP	AP1S2	88571	AT	3.28188e-35	0.56627
WTAP	SSR1	75259	AA	3.58625e-37	0.579541
WTAP	CELF1	15763	AA	1.74383e-44	0.624226
WTAP	GRB2	43439	AP	4.80495e-31	0.535933
WTAP	HNRNPDL	69705	ES	9.21348e-43	0.614318
WTAP	CREM	11237	AT	9.88843e-31	0.53352
WTAP	NPM1	74519	AT	1.65097e-39	0.594598
WTAP	PCMT1	78104	AT	6.43841e-65	0.7198
WTAP	FBXO5	78210	AP	8.28532e-64	0.715461
WTAP	ZC3H7A	34033	AP	1.55702e-31	0.539662
WTAP	ZNF207	40205	ES	1.34489e-40	0.601353
WTAP	KLHL42	20900	ES	8.80601e-31	0.533909
WTAP	DCTN2	22644	ES	9.83581e-31	0.533538
WTAP	RPP14	65434	AD	2.87237e-40	0.599326
WTAP	MRPL19	54157	AT	1.02056e-28	0.51754
WTAP	BPTF	43116	AD	1.98363e-29	0.523282
WTAP	SET	87776	AP	4.22104e-50	0.654231
WTAP	STAT1	56594	AT	1.79086e-33	0.553995
WTAP	HDAC4	58232	AT	2.12239e-27	0.506603
WTAP	ABL2	9103	AT	2.4995e-37	0.580576
WTAP	UCHL5	9240	AT	9.1067e-36	0.570098
WTAP	CEP57L1	77160	AT	7.91319e-42	0.608797
WTAP	PFKM	21429	ES	2.53962e-29	0.522423
WTAP	SUCLA2	25849	AP	6.01993e-37	0.578049
WTAP	HSPA14	10831	AT	1.94057e-29	0.523359
WTAP	TMPO	23849	ES	2.13859e-33	0.553438
WTAP	PHLPP2	37476	AT	9.72955e-30	0.525746
WTAP	HUS1	79614	AT	2.57529e-31	0.538002
WTAP	ING3	81586	AT	9.62361e-41	0.602243
WTAP	RABGEF1	79898	ES	1.54677e-32	0.54716
WTAP	PLEKHB2	55370	AT	6.83506e-37	0.577682
WTAP	NIN	27492	AT	1.04901e-37	0.58305
WTAP	EXOSC3	86446	ES	2.10749e-30	0.530969
WTAP	CEP78	86655	AT	2.43592e-29	0.522568
WTAP	FLCN	39461	AT	1.77019e-27	0.507268
WTAP	HIRA	61047	AP	3.70424e-34	0.558892
WTAP	NAF1	71008	AT	6.63182e-52	0.663192
WTAP	PLSCR1	67169	ES	3.62015e-32	0.544421
WTAP	PGM3	76864	RI	1.95276e-33	0.553723
WTAP	NFE2L1	42158	AP	8.98515e-38	0.583489
WTAP	MORF4L2	89764	AP	1.95112e-33	0.553726
WTAP	FXR1	67746	ES	1.60891e-45	0.630011
WTAP	MAX	27935	RI	6.01011e-36	0.571329
WTAP	ZBTB1	27892	AT	1.67799e-33	0.554199
WTAP	VRK2	53646	ES	2.33663e-34	0.560309
WTAP	TAF5L	10228	AT	1.73127e-43	0.618537
WTAP	PACRGL	68877	AT	1.77146e-27	0.507265
WTAP	CEP78	86657	ES	2.43592e-29	0.522568
WTAP	KIF1B	602	AT	4.75886e-50	0.653968
WTAP	CSNK1A1	74047	ES	1.03414e-47	0.641873
WTAP	CTNNB1	64250	RI	1.24627e-39	0.595363
WTAP	CNOT4	81885	AT	5.91858e-29	0.519462
WTAP	C16orf52	35532	AT	9.31408e-27	0.501126
WTAP	RNF14	73843	ES	1.76972e-34	0.56116
WTAP	KDM4C	85823	AP	8.43089e-37	0.577075
WTAP	HP1BP3	937	AP	5.98906e-34	0.557408
WTAP	PCBP2	22052	ES	3.55199e-45	0.628102
WTAP	TERF1	84141	ES	8.27889e-34	0.556403
WTAP	MAX	27939	RI	6.01011e-36	0.571329
WTAP	SRSF7	53276	RI	9.36707e-46	0.631308
WTAP	DCBLD1	77342	AT	7.32297e-27	0.502023
WTAP	HMGB1	25572	RI	8.01334e-34	0.556504
WTAP	MBNL1	67324	ES	4.50937e-42	0.610251
WTAP	GNB5	30638	AT	2.79671e-27	0.505588
WTAP	SOD2	78304	RI	2.77689e-37	0.580274
WTAP	HMGB1	25568	AP	8.01334e-34	0.556504
WTAP	PIGX	68260	ES	3.8877e-27	0.504373
WTAP	BLOC1S6	30431	AT	3.76929e-54	0.673931
WTAP	PGAM5	25293	AT	1.21328e-26	0.500136
WTAP	PIP5K1A	7580	ES	2.04902e-31	0.538757
WTAP	PSMF1	58475	AA	2.37626e-32	0.54578
WTAP	MAP3K7	77020	ES	2.83084e-60	0.70108
WTAP	PNRC1	76987	AD	3.49219e-47	0.63906
WTAP	ASCC3	77092	AT	6.94018e-53	0.667936
WTAP	ODF2	87766	ES	3.1634e-29	0.521657
WTAP	ERAP1	72865	AT	2.50776e-30	0.53038
WTAP	SNAP47	10056	AP	1.09703e-26	0.500514
WTAP	PCNP	65960	ES	1.67166e-44	0.62433
WTAP	MEF2D	8275	ES	3.29984e-33	0.552073
WTAP	KDM2A	17152	AP	4.32343e-28	0.512386
WTAP	ZBTB43	87600	AP	4.74978e-28	0.512047
WTAP	TMA16	71020	ES	1.63522e-30	0.531827
WTAP	MCM9	77355	AT	9.8651e-46	0.631184
WTAP	ECHDC1	77467	ES	1.67617e-29	0.523867
WTAP	ABI1	11048	ES	1.97412e-35	0.567794
WTAP	SMAD2	45450	AT	3.90473e-40	0.598501
WTAP	APP	60282	ES	4.09374e-34	0.558584
WTAP	SETD3	29213	AT	3.17473e-27	0.505121
WTAP	ITPR2	20849	AT	2.51241e-27	0.505983
WTAP	HNRNPM	47236	RI	3.4299e-54	0.674123
WTAP	GOSR2	42045	ES	7.946e-32	0.541865
WTAP	FGFR1OP2	20854	AT	1.41627e-46	0.635787
WTAP	FAM98B	29919	AT	1.01e-55	0.681188
WTAP	FIP1L1	69315	ES	9.34962e-29	0.51785
WTAP	2022-09-15	3687	ES	1.05126e-33	0.555659
WTAP	WTAP	78310	AP	0	1
WTAP	SRPK2	81282	AT	4.08061e-34	0.558594
WTAP	ARSK	72806	AT	3.56693e-29	0.521238
WTAP	MAX	27934	RI	6.01011e-36	0.571329
WTAP	CNBP	66704	AA	3.50275e-46	0.633649
WTAP	RHOA	64857	ES	1.76285e-32	0.54674
WTAP	2022-03-08	11362	ES	1.79655e-32	0.54668
WTAP	PIK3C3	45317	AT	2.23652e-28	0.51475
WTAP	CHORDC1	18267	RI	7.3762e-27	0.501996
WTAP	ASH1L	8088	ES	1.37031e-30	0.532423
WTAP	LRRFIP2	63960	ES	8.71283e-28	0.509852
WTAP	PLEKHM2	767	ES	3.62158e-31	0.536873
WTAP	SEC23A	27345	AP	3.33535e-34	0.559215
WTAP	RPS6KA5	28834	ES	3.62318e-30	0.529129
WTAP	STX7	77642	AT	6.89402e-53	0.66795
WTAP	TRA2B	68039	ES	9.69907e-66	0.722963
WTAP	ZNF384	19923	ES	1.10792e-37	0.582895
WTAP	COX11	42569	RI	1.10775e-26	0.500477
WTAP	EXOSC3	86444	AT	2.10749e-30	0.530969
WTAP	SRSF2	43663	RI	6.75076e-31	0.534799
WTAP	VRK2	53645	ES	2.33663e-34	0.560309
WTAP	SUPT16H	26572	AT	3.89229e-35	0.565756
WTAP	NAP1L1	23467	AP	3.12939e-28	0.513547
WTAP	BCAP29	81361	ES	1.05491e-26	0.50066
WTAP	RC3H2	87484	AT	5.54651e-39	0.591275
WTAP	GPATCH2L	28542	AT	9.06325e-50	0.652549
WTAP	FBXO3	14929	RI	6.31483e-34	0.557243
WTAP	RIF1	55572	ES	9.88451e-45	0.625615
WTAP	PCMT1	78109	AD	6.43841e-65	0.7198
WTAP	ZFAND1	84309	ES	8.04935e-29	0.518379
WTAP	TUBGCP3	26303	AT	2.17769e-33	0.553381
WTAP	FMR1	90274	ES	2.38857e-32	0.545763
WTAP	TECPR2	29415	AT	2.97437e-34	0.559568
WTAP	STAT3	41034	AA	1.12595e-51	0.662067
WTAP	USP45	77063	AT	6.7651e-43	0.615102
WTAP	RNF14	73849	ES	1.76972e-34	0.56116
WTAP	ISG20L2	8306	RI	5.6317e-43	0.615567
WTAP	CHCHD3	81834	AT	5.7012e-34	0.55756
WTAP	NOLC1	12939	AD	1.06399e-37	0.58301
WTAP	SRSF2	43660	RI	6.75076e-31	0.534799
WTAP	PFKM	21423	RI	2.53962e-29	0.522423
WTAP	HNRNPC	26559	AA	1.31438e-43	0.619226
WTAP	SYNE2	27846	ES	3.93436e-31	0.536598
WTAP	GTF2H1	14599	AP	1.35603e-49	0.651657
WTAP	NUMB	28287	AP	1.61373e-41	0.606943
WTAP	GLG1	37565	RI	1.36796e-27	0.50821
WTAP	TMEM237	56847	AP	5.62337e-33	0.550387
WTAP	ACADM	3483	AT	3.70754e-29	0.521102
WTAP	UIMC1	74693	ES	3.47659e-27	0.504786
WTAP	CEP57	18390	AT	3.44503e-38	0.586193
WTAP	EPB41L2	77596	ES	9.26844e-28	0.509628
WTAP	FAM21A	11559	ES	4.57693e-35	0.565268
WTAP	POLDIP3	62521	AT	3.26648e-32	0.544753
WTAP	UBP1	63866	ES	7.90723e-29	0.518441
WTAP	UEVLD	14667	AT	3.83597e-40	0.598549
WTAP	UCHL5	9246	ES	9.1067e-36	0.570098
WTAP	C11orf57	18723	RI	6.01285e-28	0.511196
WTAP	SEC24C	12178	ES	3.7143e-30	0.529045
WTAP	ERCC4	34064	AT	4.36289e-40	0.598203
WTAP	STAMBP	53990	RI	3.7964e-28	0.512854
WTAP	DIMT1	72182	AT	4.79312e-39	0.591677
WTAP	SERBP1	3354	AA	3.73064e-46	0.6335
WTAP	TSR1	38387	AT	2.06479e-37	0.581122
WTAP	DCAF10	86447	ES	9.24831e-38	0.583408
WTAP	MPP5	28044	AT	1.45772e-37	0.582115
WTAP	CUL1	82147	AP	1.73794e-29	0.523741
WTAP	CAMKK2	24854	ES	3.12784e-28	0.513549
WTAP	RACGAP1	21630	AD	3.24677e-29	0.521566
WTAP	HDGF	8323	AD	1.89611e-28	0.515339
WTAP	CUL2	11218	AP	6.54469e-38	0.584386
WTAP	AKIP1	14280	RI	1.25429e-27	0.508527
WTAP	LYRM2	77013	AD	9.688e-54	0.672003
WTAP	GDAP2	4377	AT	8.50569e-28	0.50994
WTAP	PACRGL	68924	AD	1.77146e-27	0.507265
WTAP	PPHLN1	21227	ES	1.08368e-35	0.569582
WTAP	CNOT7	82785	AT	4.34732e-33	0.551202
WTAP	RBM41	89818	ES	6.20598e-36	0.571234
WTAP	C6orf106	75787	ES	2.08433e-29	0.52311
WTAP	MED1	40644	AT	8.43999e-28	0.509968
WTAP	PRKDC	83791	ES	4.86029e-45	0.627343
WTAP	EIF5	29443	RI	2.23674e-39	0.593769
WTAP	CGGBP1	65668	AA	1.50097e-31	0.539782
WTAP	IRF2BP2	10338	AD	6.25174e-40	0.597233
WTAP	ELF2	70614	AA	7.58133e-33	0.549438
WTAP	MBD4	66717	AT	3.01765e-37	0.580036
WTAP	BTBD10	14453	ES	3.22813e-44	0.622711
WTAP	PSME3	41149	ES	2.67156e-39	0.593283
WTAP	CEP135	69337	AT	7.98747e-32	0.541848
WTAP	ELF2	70610	AP	7.58133e-33	0.549438
WTAP	WDR33	55244	AT	4.80532e-36	0.571989
WTAP	TPM4	48128	RI	4.64834e-27	0.503712
WTAP	RBM48	80441	RI	1.06129e-34	0.56272
WTAP	COG5	81337	AT	2.25308e-37	0.580873
WTAP	CHM	89563	AT	5.7771e-40	0.597446
WTAP	NUP43	78098	RI	3.5521e-43	0.616731
WTAP	SNX3	77149	AD	2.18711e-51	0.660649
WTAP	CSNK1A1	74045	AD	1.03414e-47	0.641873
WTAP	SRSF7	53279	RI	9.36707e-46	0.631308
WTAP	UBE2G2	60831	ES	1.45103e-30	0.53223
WTAP	CARM1	47597	RI	1.13371e-27	0.508895
WTAP	DDX20	4189	RI	1.88063e-40	0.600459
WTAP	ADNP	59788	AP	1.77811e-27	0.507251
WTAP	TMEM242	78239	AT	5.92081e-44	0.621211
WTAP	SF1	16681	AA	1.19423e-52	0.666803
WTAP	UBE2D2	73622	ES	1.36638e-39	0.595113
WTAP	NIP7	37283	ES	6.6525e-33	0.549854
WTAP	NDE1	34185	AT	8.84259e-52	0.662582
WTAP	KLHL5	69042	AT	1.52821e-34	0.561609
WTAP	RPS6KC1	9781	RI	2.20689e-36	0.574274
WTAP	ATP11C	90245	ES	2.94894e-36	0.573425
WTAP	SENP6	76797	ES	1.41364e-51	0.661582
WTAP	SEC22C	64290	AT	2.17106e-31	0.538566
WTAP	HNRNPM	94942	ES	3.4299e-54	0.674123
WTAP	TANK	55733	AT	1.33094e-27	0.50831
WTAP	TAF1A	9883	AT	7.00946e-49	0.647991
WTAP	HUS1	79616	RI	2.57529e-31	0.538002
WTAP	POM121C	80119	AP	3.83225e-28	0.51282
WTAP	GART	60430	AT	1.12127e-39	0.595651
WTAP	ARSB	72614	AT	5.80137e-36	0.571433
WTAP	FAM91A1	85069	AT	1.14154e-36	0.576196
WTAP	CLDND1	65783	ES	6.79321e-31	0.534778
WTAP	TNFAIP1	39886	ES	1.5254e-28	0.516114
WTAP	ODF2	87749	AP	3.1634e-29	0.521657
WTAP	SCAF11	21316	AP	1.56892e-30	0.531967
WTAP	INTS12	70247	AP	3.06928e-46	0.633962
WTAP	FAM60A	20982	AP	3.16369e-28	0.513508
WTAP	PDCD10	67560	ES	7.7276e-45	0.626216
WTAP	GSKIP	29199	AD	3.59348e-31	0.536899
WTAP	NCOR2	25148	ES	2.52987e-27	0.505957
WTAP	SIAH1	36342	AT	1.45626e-31	0.539881
WTAP	BCLAF1	77906	ES	5.21586e-59	0.695711
WTAP	ZC3HAV1	81940	AT	5.23927e-32	0.543222
WTAP	NUP133	10222	AT	3.47919e-38	0.586165
WTAP	CALU	81714	ES	5.58126e-28	0.511465
WTAP	SOD2	78308	ES	2.77689e-37	0.580274
WTAP	UBE2D3	70141	AD	1.93647e-53	0.67058
WTAP	BLZF1	8916	AT	1.06104e-35	0.569644
WTAP	ZFAND1	84308	ES	8.04935e-29	0.518379
WTAP	UHRF2	85821	ES	5.06535e-31	0.535757
WTAP	NIPA2	29683	ES	2.40382e-34	0.560222
WTAP	UBE2G2	60833	ES	1.45103e-30	0.53223
WTAP	EIF4H	80063	ES	4.66263e-47	0.638388
WTAP	PRRC2B	87935	ES	8.00699e-46	0.631682
WTAP	RELL1	69002	AT	9.54161e-38	0.583319
WTAP	LRCH3	68318	AT	8.40076e-40	0.596434
WTAP	SPG20	25639	AP	8.48109e-32	0.541653
WTAP	FAM126A	78946	ES	1.03505e-31	0.541001
WTAP	2022-09-15	3688	ES	1.05126e-33	0.555659
WTAP	ARL5A	55593	AT	3.3374e-40	0.598923
WTAP	WDR11	13288	RI	7.83512e-29	0.518474
WTAP	PHC3	67600	AT	1.21486e-26	0.500132
WTAP	BOD1L1	68797	ES	3.85075e-34	0.558773
WTAP	C9orf72	86052	AT	6.6313e-31	0.534858
WTAP	ZCCHC9	72663	RI	1.44654e-38	0.588619
WTAP	RNF145	74403	AP	3.8211e-32	0.544246
WTAP	UBE2N	23691	AD	3.45997e-30	0.529286
WTAP	BSDC1	1591	RI	9.38439e-34	0.556013
WTAP	PPIG	55871	AT	2.33729e-27	0.506248
WTAP	TMEM106B	78803	AT	7.56652e-27	0.501901
WTAP	CPSF6	23304	ES	2.72302e-35	0.56683
WTAP	RBM23	26653	ES	1.46977e-39	0.594914
WTAP	RHOT1	40180	ES	2.26172e-30	0.53073
WTAP	GTF2H2C	72388	AT	1.78058e-33	0.554013
WTAP	NIN	27495	ES	1.04901e-37	0.58305
WTAP	CPSF7	16198	AD	1.12366e-42	0.613813
WTAP	UHRF2	85819	AT	5.06535e-31	0.535757
WTAP	MB21D1	76743	AT	5.30248e-33	0.550573
WTAP	LARP4	21700	AT	5.37691e-45	0.627098
WTAP	POM121	79925	AP	2.53896e-37	0.580531
WTAP	PMS2	78701	ES	1.0218e-31	0.541043
WTAP	PRKAR1A	43143	AP	8.32212e-45	0.626035
WTAP	CARM1	47600	ES	1.13371e-27	0.508895
WTAP	MAPK9	75007	AA	4.20939e-47	0.638626
WTAP	PSMD2	67871	AD	1.58338e-35	0.568452
WTAP	SPRTN	10277	RI	1.53495e-32	0.547185
WTAP	FAM49B	85146	ES	3.8006e-33	0.551627
WTAP	FAM204A	13247	ES	2.53327e-34	0.560061
WTAP	ALG10	21064	AT	7.1434e-32	0.542213
WTAP	KDM4C	85833	ES	8.43089e-37	0.577075
WTAP	TP53BP2	9930	ES	6.02464e-49	0.648331
WTAP	QKI	78405	AT	1.46893e-61	0.706411
WTAP	CCDC50	68126	ES	1.56129e-27	0.507727
WTAP	WDR41	72586	ES	1.61054e-34	0.561448
WTAP	TJP1	29766	ES	1.68556e-31	0.539401
WTAP	AZI2	63795	AA	1.43135e-46	0.635762
WTAP	CAPRIN1	14941	AP	8.90415e-45	0.62587
WTAP	SAR1B	73417	AD	2.64251e-27	0.505797
WTAP	BRD4	48069	AT	4.41937e-34	0.558348
WTAP	MBD4	66724	ES	3.01765e-37	0.580036
WTAP	RELT	17694	ES	2.28867e-28	0.514667
WTAP	PPP1CC	24501	AT	1.43727e-31	0.539925
WTAP	RNF111	30928	AA	1.69658e-31	0.539379
WTAP	PEX26	61023	ES	1.60854e-28	0.515925
WTAP	MAP3K4	78359	ES	2.42286e-46	0.634522
WTAP	DDX46	73426	ES	2.53824e-54	0.674734
WTAP	MSH2	53497	AT	1.25862e-27	0.508514
WTAP	CDC42	1006	ES	1.7042e-29	0.523809
WTAP	R3HDM1	55443	ES	6.35195e-38	0.584471
WTAP	WAC	11105	ES	6.62698e-43	0.615155
WTAP	RPS6KA5	28832	AT	3.62318e-30	0.529129
WTAP	C12orf43	24819	ES	4.43996e-31	0.536196
WTAP	KCTD20	75982	ES	2.50122e-39	0.593463
WTAP	STAG1	66931	AT	1.01337e-42	0.614076
WTAP	RQCD1	57493	AT	1.21503e-40	0.601624
WTAP	SRSF3	75983	AT	6.90928e-72	0.745292
WTAP	YLPM1	28429	ES	5.70594e-42	0.609643
WTAP	GTF2H2C	72391	ES	1.78058e-33	0.554013
WTAP	AP3S2	32455	ES	1.85456e-32	0.546577
WTAP	DDX20	4190	RI	1.88063e-40	0.600459
WTAP	SRRM1	1128	ES	8.44194e-27	0.501493
RBM15	ANP32A	270111	AA	3.80795e-28	0.512843
RBM15	H2AFV	79572	AT	1.33001e-32	0.547644
RBM15	CSDE1	4336	ES	8.72399e-30	0.526122
RBM15	HNRNPA2B1	318763	ES	2.55371e-34	0.560036
RBM15	CDYL	75229	AP	2.06988e-27	0.506695
RBM15	WHSC1	68527	AT	8.39813e-45	0.626013
RBM15	SNRNP200	563711	ES	7.14895e-27	0.502113
RBM15	TMEM199	39890	AT	5.98502e-34	0.55741
RBM15	BUB1	54939	ES	2.24285e-27	0.5064
RBM15	HNRNPA2B1	79038	AA	2.55371e-34	0.560036
RBM15	EZH2	82154	ES	2.03492e-29	0.523194
RBM15	CBWD2	55054	ES	1.8461e-27	0.507114
RBM15	FAM111B	16019	ES	1.14894e-36	0.576177
RBM15	FAM111B	16018	ES	1.14894e-36	0.576177
RBM15	FUBP1	3546	ES	2.71995e-33	0.552682
RBM15	BOD1	74584	ES	1.42514e-27	0.508061
RBM15	NEIL3	71227	AT	7.79978e-29	0.51849
RBM15	DDX23	21484	ES	1.91729e-35	0.567881
RBM15	ARHGAP11A	29818	AA	5.60754e-40	0.597526
RBM15	DNAJC14	22260	AP	1.29418e-29	0.524762
RBM15	AK2	1656	ES	9.207e-29	0.517904
RBM15	BRIP1	42893	AT	6.06746e-27	0.502723
RBM15	ABCF2	82355	AT	1.31948e-31	0.540205
RBM15	RIC8A	13590	AA	2.68396e-27	0.50574
RBM15	ESCO2	83185	AT	3.49368e-37	0.579616
RBM15	ASAP2	52611	ES	1.19155e-27	0.508714
RBM15	RAN	25206	ES	4.47553e-30	0.528409
RBM15	NEIL3	71228	ES	7.79978e-29	0.51849
RBM15	SEH1L	44727	AA	2.98532e-36	0.573389
RBM15	TCF20	62501	ES	1.37216e-31	0.540077
RBM15	ALS2	56917	AT	1.49788e-27	0.507879
RBM15	SYNCRIP	76934	AT	2.61156e-37	0.58045
RBM15	CSNK1G3	73145	ES	5.17482e-31	0.535686
RBM15	CCNE2	84585	ES	9.76215e-42	0.608252
RBM15	ACP1	52514	ES	1.26247e-28	0.516786
RBM15	DLGAP5	27620	ES	2.3273e-27	0.506264
RBM15	CANT1	43973	RI	4.28116e-28	0.512421
RBM15	CDC7	3738	ES	4.3639e-32	0.543815
RBM15	CKAP2L	55025	RI	1.5763e-29	0.524079
RBM15	BRD3	88089	AT	1.27339e-31	0.540322
RBM15	GINS4	83515	AT	3.3993e-35	0.566164
RBM15	NFATC3	37186	ES	3.17773e-31	0.537306
RBM15	PIGX	68257	AT	2.6071e-28	0.514202
RBM15	POM121	79927	AT	1.09157e-27	0.509033
RBM15	TMEM201	565	AT	7.42133e-31	0.534482
RBM15	EZH2	82160	ES	2.03492e-29	0.523194
RBM15	CLSPN	1731	AT	8.88697e-45	0.625875
RBM15	UBE2D3	70130	ES	8.44686e-31	0.534049
RBM15	G3BP2	69550	ES	7.33428e-37	0.577478
RBM15	SSR1	75259	AA	6.73477e-34	0.557044
RBM15	CELF1	15763	AA	2.09878e-49	0.650687
RBM15	GRB2	43439	AP	1.31595e-29	0.524704
RBM15	ALG2	87057	ES	8.56558e-29	0.518159
RBM15	NIF3L1	56772	ES	1.15356e-28	0.517106
RBM15	FBXO5	78210	AP	4.36617e-47	0.638541
RBM15	DNA2	11946	ES	4.53323e-29	0.520398
RBM15	ZNF207	40205	ES	1.96953e-30	0.531198
RBM15	CENPN	37739	AT	1.54634e-31	0.539684
RBM15	MRPL19	54157	AT	5.19846e-28	0.511722
RBM15	DEPDC1	3369	ES	8.0665e-35	0.563554
RBM15	AURKA	59846	ES	3.20171e-29	0.521615
RBM15	SET	87776	AP	2.78824e-47	0.639583
RBM15	UCHL5	9240	AT	6.95156e-34	0.556946
RBM15	CEP57L1	77160	AT	1.15911e-28	0.517089
RBM15	HSPA14	10831	AT	3.88126e-37	0.579314
RBM15	TMPO	23849	ES	3.56447e-46	0.633608
RBM15	HUS1	79614	AT	2.25228e-35	0.567399
RBM15	ING3	81586	AT	8.3985e-27	0.501512
RBM15	MAPKAP1	87583	ES	4.42301e-28	0.512304
RBM15	PLEKHB2	55370	AT	3.70519e-31	0.536797
RBM15	NIN	27492	AT	3.30718e-30	0.52944
RBM15	EXOSC3	86446	ES	2.17088e-32	0.546071
RBM15	CEP78	86655	AT	1.98502e-36	0.574584
RBM15	NSUN4	2794	ES	5.83568e-29	0.519512
RBM15	HIRA	61047	AP	5.19181e-33	0.55064
RBM15	KLHL7	78950	AT	1.01005e-30	0.533449
RBM15	NAF1	71008	AT	2.48896e-31	0.538115
RBM15	RAD51AP1	19791	ES	2.53202e-31	0.538058
RBM15	PGM3	76864	RI	1.57088e-27	0.507705
RBM15	TMX2	15923	AA	2.19717e-34	0.560498
RBM15	FXR1	67746	ES	4.28855e-34	0.55844
RBM15	DNAJC5	60176	ES	1.68852e-29	0.523841
RBM15	CEP152	30503	ES	4.46973e-32	0.543738
RBM15	TAF5L	10228	AT	3.68349e-37	0.579464
RBM15	CEP78	86657	ES	1.98502e-36	0.574584
RBM15	E2F7	23514	ES	4.81084e-30	0.528162
RBM15	KIF1B	602	AT	6.35152e-39	0.590901
RBM15	DBF4	80345	AA	7.81323e-44	0.620522
RBM15	WIPI2	78656	ES	6.17276e-32	0.542689
RBM15	LRP8	3059	ES	1.67573e-27	0.507469
RBM15	CCDC138	54896	ES	1.55531e-30	0.531996
RBM15	HP1BP3	937	AP	9.99418e-35	0.562903
RBM15	SRSF7	53276	RI	8.54777e-36	0.570286
RBM15	HMGB1	25572	RI	3.96492e-28	0.512697
RBM15	HMGB1	25568	AP	3.96492e-28	0.512697
RBM15	SGOL2	56747	AT	5.67478e-43	0.615548
RBM15	PIGX	68260	ES	2.6071e-28	0.514202
RBM15	PGAM5	25293	AT	1.61721e-33	0.554314
RBM15	CHEK1	19311	AT	1.41665e-34	0.56184
RBM15	DSN1	59316	AD	6.35282e-30	0.527211
RBM15	CHEK1	19307	AP	1.41665e-34	0.56184
RBM15	PPM1B	53414	AT	2.99032e-27	0.505342
RBM15	ODF2	87766	ES	3.20929e-37	0.579859
RBM15	KDM2A	17152	AP	3.2248e-28	0.51344
RBM15	TMA16	71020	ES	4.6136e-34	0.558215
RBM15	ABI1	11048	ES	3.61502e-28	0.51303
RBM15	SMAD2	45450	AT	9.71414e-33	0.548648
RBM15	GGPS1	10346	AP	3.93464e-30	0.528848
RBM15	HNRNPM	47236	RI	6.3459e-49	0.648214
RBM15	GOSR2	42045	ES	1.4487e-38	0.588615
RBM15	FGFR1OP2	20854	AT	1.04031e-26	0.500712
RBM15	C1orf43	7800	ES	1.99194e-27	0.506835
RBM15	MAPKAP1	87579	AT	4.42301e-28	0.512304
RBM15	WTAP	78310	AP	2.00439e-35	0.567748
RBM15	GINS4	83518	ES	3.3993e-35	0.566164
RBM15	ARHGAP11A	29820	RI	5.60754e-40	0.597526
RBM15	2022-03-08	11362	ES	8.7059e-28	0.509855
RBM15	SMG7	9179	AD	1.48723e-35	0.568639
RBM15	TRA2B	68039	ES	9.1157e-50	0.652536
RBM15	ARHGAP11A	29817	AT	5.60754e-40	0.597526
RBM15	EXOSC3	86444	AT	2.17088e-32	0.546071
RBM15	SUPT16H	26572	AT	1.09597e-34	0.562622
RBM15	RC3H2	87484	AT	7.06413e-40	0.596903
RBM15	GPATCH2L	28542	AT	7.36443e-32	0.542113
RBM15	RIF1	55572	ES	4.93797e-59	0.695813
RBM15	KNSTRN	29975	AA	9.43751e-27	0.501077
RBM15	TUBGCP3	26303	AT	7.13607e-27	0.50212
RBM15	ISG20L2	8306	RI	2.27571e-50	0.655584
RBM15	CHCHD3	81834	AT	3.96526e-32	0.544126
RBM15	NOLC1	12939	AD	4.1932e-29	0.520672
RBM15	CENPI	89630	AT	5.73904e-35	0.564585
RBM15	ZXDC	66597	AT	3.10218e-27	0.505206
RBM15	HNRNPC	26559	AA	1.8392e-33	0.553911
RBM15	DNA2	11947	ES	4.53323e-29	0.520398
RBM15	GTF2H1	14599	AP	7.05606e-34	0.556899
RBM15	RAD51AP1	19777	AT	2.53202e-31	0.538058
RBM15	CEP57	18390	AT	3.61174e-36	0.572829
RBM15	NIF3L1	56774	AA	1.15356e-28	0.517106
RBM15	POLDIP3	62521	AT	2.10844e-33	0.553483
RBM15	NIF3L1	56777	AD	1.15356e-28	0.517106
RBM15	UEVLD	14667	AT	1.2275e-27	0.508605
RBM15	UCHL5	9246	ES	6.95156e-34	0.556946
RBM15	PSMD11	40209	RI	2.44981e-27	0.506076
RBM15	C11orf57	18723	RI	1.43477e-36	0.575531
RBM15	ERCC4	34064	AT	7.23212e-37	0.577519
RBM15	BPNT1	9867	AD	6.76735e-28	0.510768
RBM15	STAMBP	53990	RI	3.25677e-27	0.505027
RBM15	NUP62	51127	RI	3.5702e-36	0.572863
RBM15	SERBP1	3354	AA	2.87088e-49	0.649989
RBM15	TSR1	38387	AT	8.54154e-32	0.541629
RBM15	RNF220	2558	AT	2.05496e-29	0.52316
RBM15	DCAF10	86447	ES	4.25149e-45	0.627667
RBM15	MPP5	28044	AT	2.32766e-29	0.522726
RBM15	RACGAP1	21630	AD	6.55026e-45	0.626618
RBM15	HDGF	8323	AD	8.53285e-34	0.556309
RBM15	CUL2	11218	AP	2.85846e-42	0.611425
RBM15	MRPL35	54419	RI	1.03479e-40	0.60205
RBM15	LYRM2	77013	AD	8.81964e-32	0.541525
RBM15	GDAP2	4377	AT	2.17098e-39	0.59385
RBM15	CNOT7	82785	AT	5.46972e-39	0.591313
RBM15	RBM41	89818	ES	3.61606e-28	0.513029
RBM15	C6orf106	75787	ES	3.55103e-34	0.559022
RBM15	MED1	40644	AT	6.40886e-46	0.632213
RBM15	PRKDC	83791	ES	7.0335e-33	0.549676
RBM15	EIF5	29443	RI	2.95265e-40	0.599252
RBM15	ELF2	70614	AA	3.03787e-27	0.505284
RBM15	MBD4	66717	AT	4.23741e-41	0.604412
RBM15	PSME3	41149	ES	5.55569e-41	0.603697
RBM15	ELF2	70610	AP	3.03787e-27	0.505284
RBM15	WDR33	55244	AT	4.90671e-38	0.585199
RBM15	FBXO22	31899	AT	1.39843e-28	0.516423
RBM15	RBM48	80441	RI	4.5189e-37	0.578876
RBM15	LZIC	587	AP	3.84101e-36	0.572648
RBM15	BRCA1	41187	ES	8.25551e-41	0.60265
RBM15	CHEK1	19316	ES	1.41665e-34	0.56184
RBM15	SRSF7	53279	RI	8.54777e-36	0.570286
RBM15	MTCH2	15788	ES	5.74052e-33	0.550322
RBM15	DDX20	4189	RI	7.69468e-44	0.62056
RBM15	EIF1AD	16965	AA	4.43878e-37	0.578927
RBM15	ADNP	59788	AP	4.02781e-29	0.520813
RBM15	ASXL1	58952	AT	4.72196e-28	0.512068
RBM15	ZC3H14	28722	ES	4.57374e-28	0.512183
RBM15	SF1	16681	AA	6.21323e-42	0.609423
RBM15	UBE2D2	73622	ES	7.97525e-35	0.563588
RBM15	NIP7	37283	ES	8.24937e-28	0.510051
RBM15	FPGT	3452	ES	1.35125e-27	0.508255
RBM15	NDE1	34185	AT	9.14142e-40	0.596205
RBM15	RPS6KC1	9781	RI	3.52395e-32	0.544508
RBM15	KDM2B	24879	RI	2.14202e-30	0.530914
RBM15	HNRNPM	94942	ES	6.3459e-49	0.648214
RBM15	NUP62	51123	RI	3.5702e-36	0.572863
RBM15	TAF1A	9883	AT	1.97519e-31	0.538878
RBM15	HUS1	79616	RI	2.25228e-35	0.567399
RBM15	POM121C	80119	AP	2.46124e-28	0.514408
RBM15	GART	60430	AT	4.07725e-43	0.616383
RBM15	FAM91A1	85069	AT	8.14853e-28	0.510095
RBM15	ODF2	87749	AP	3.20929e-37	0.579859
RBM15	RNF220	2559	AD	2.05496e-29	0.52316
RBM15	SCAF11	21316	AP	3.63705e-35	0.565961
RBM15	AIMP2	78705	ES	5.12693e-34	0.557889
RBM15	INTS12	70247	AP	6.62487e-34	0.557095
RBM15	CEP85	1244	AA	4.59722e-41	0.604197
RBM15	PDCD10	67560	ES	9.45992e-37	0.576741
RBM15	BCLAF1	77906	ES	9.08722e-37	0.576858
RBM15	ZC3HAV1	81940	AT	7.71563e-33	0.549382
RBM15	MAP4K4	54754	ES	9.0703e-29	0.517957
RBM15	UBE2D3	70141	AD	8.44686e-31	0.534049
RBM15	BLZF1	8916	AT	1.64191e-27	0.507543
RBM15	NIPA2	29683	ES	1.9575e-41	0.606438
RBM15	EIF4H	80063	ES	1.51105e-27	0.507847
RBM15	HN1L	33123	ES	1.07338e-35	0.56961
RBM15	PRRC2B	87935	ES	8.60378e-42	0.60858
RBM15	RELL1	69002	AT	4.23241e-28	0.512463
RBM15	ARL5A	55593	AT	6.18472e-42	0.609435
RBM15	PPP2R1B	18672	AT	1.47451e-27	0.507936
RBM15	PHC3	67600	AT	1.23816e-26	0.50006
RBM15	ZBTB44	19493	RI	4.30383e-29	0.52058
RBM15	UBE2K	69077	ES	1.01683e-26	0.500798
RBM15	CPSF6	23304	ES	1.29047e-40	0.601463
RBM15	NASP	2708	ES	3.76558e-28	0.512883
RBM15	NIN	27495	ES	3.30718e-30	0.52944
RBM15	TEFM	40128	AA	1.24439e-35	0.56917
RBM15	CPSF7	16198	AD	3.16916e-37	0.579896
RBM15	TADA2A	40518	AT	7.23728e-27	0.502067
RBM15	LARP4	21700	AT	1.33654e-37	0.582362
RBM15	POM121	79925	AP	1.09157e-27	0.509033
RBM15	PMS2	78701	ES	5.49875e-31	0.535483
RBM15	MAPK9	75007	AA	1.50769e-37	0.582019
RBM15	SMG7	9178	ES	1.48723e-35	0.568639
RBM15	PSMD2	67871	AD	2.44607e-38	0.587153
RBM15	SPRTN	10277	RI	1.00329e-41	0.608181
RBM15	ANAPC1	54969	AP	2.41952e-38	0.587183
RBM15	ALG10	21064	AT	2.81436e-35	0.566731
RBM15	TP53BP2	9930	ES	1.0804e-27	0.50907
RBM15	QKI	78405	AT	2.10771e-32	0.546166
RBM15	C1orf112	8957	ES	2.87857e-28	0.513847
RBM15	CAPRIN1	14941	AP	9.43783e-36	0.569992
RBM15	SAR1B	73417	AD	2.56527e-28	0.514259
RBM15	MBD4	66724	ES	4.23741e-41	0.604412
RBM15	RELT	17694	ES	1.00628e-27	0.509329
RBM15	PEX26	61023	ES	2.31403e-28	0.514628
RBM15	DDX46	73426	ES	3.33982e-45	0.628251
RBM15	MSH2	53497	AT	7.00023e-44	0.620795
RBM15	R3HDM1	55443	ES	7.77519e-39	0.590342
RBM15	RPRD2	7471	RI	2.65171e-33	0.552762
RBM15	WAC	11105	ES	2.90076e-38	0.586675
RBM15	C12orf43	24819	ES	2.07649e-27	0.506683
RBM15	STAG1	66931	AT	1.53817e-32	0.547178
RBM15	RQCD1	57493	AT	8.64602e-34	0.556268
RBM15	RPN1	66652	ES	1.07571e-26	0.500587
RBM15	SRSF3	75983	AT	6.4155e-48	0.642968
RBM15	YLPM1	28429	ES	5.87771e-27	0.502841
RBM15	AP3S2	32455	ES	1.73992e-31	0.539296
RBM15	DDX20	4190	RI	7.69468e-44	0.62056
RBM15B	DNMT3A	52856	AT	7.91427e-31	0.534267
RBM15B	SMARCC2	22391	AD	4.84125e-43	0.61595
RBM15B	CSDE1	4336	ES	6.07146e-30	0.527366
RBM15B	HNRNPA2B1	318763	ES	2.13904e-34	0.56058
RBM15B	PCBP2	213888	ES	3.03843e-28	0.513653
RBM15B	DHX30	399746	ES	1.56667e-67	0.729707
RBM15B	WHSC1	68527	AT	1.91644e-27	0.506977
RBM15B	SNRNP200	563711	ES	4.60865e-36	0.572112
RBM15B	AZI2	63794	AT	9.26111e-27	0.501147
RBM15B	TMEM199	39890	AT	7.4573e-30	0.526661
RBM15B	H2AFY	73442	AP	2.86775e-27	0.505496
RBM15B	HNRNPA2B1	79038	AA	2.13904e-34	0.56058
RBM15B	TCAIM	64358	AT	5.03913e-34	0.557942
RBM15B	FUBP1	3546	ES	8.72263e-28	0.509848
RBM15B	DDX23	21484	ES	4.05682e-39	0.592136
RBM15B	DNAJC14	22260	AP	9.006e-51	0.6576
RBM15B	C2CD5	20733	ES	1.02742e-26	0.500759
RBM15B	PCNP	65963	AA	2.1941e-27	0.506481
RBM15B	SCP2	3045	ES	1.7336e-27	0.507344
RBM15B	NFYA	76094	ES	2.12567e-32	0.546139
RBM15B	BSDC1	1590	AT	2.13605e-48	0.645475
RBM15B	IP6K2	64747	RI	7.04955e-28	0.510621
RBM15B	MPHOSPH8	25400	AT	1.79854e-27	0.50721
RBM15B	TCF20	62501	ES	1.83847e-36	0.574808
RBM15B	MBD1	45518	ES	4.27115e-31	0.536325
RBM15B	ALS2	56917	AT	1.1469e-26	0.500347
RBM15B	SYNCRIP	76934	AT	8.90925e-27	0.501292
RBM15B	USP33	3534	ES	1.94312e-29	0.523354
RBM15B	IP6K2	64745	RI	7.04955e-28	0.510621
RBM15B	OSBPL9	2960	AP	5.04273e-30	0.528001
RBM15B	DHX30	64544	ES	1.56667e-67	0.729707
RBM15B	BRD3	88089	AT	1.12564e-36	0.576236
RBM15B	POM121	79927	AT	1.53387e-38	0.588456
RBM15B	IP6K2	64752	RI	7.04955e-28	0.510621
RBM15B	TCAIM	64361	ES	5.03913e-34	0.557942
RBM15B	TPGS2	45269	ES	3.66215e-38	0.586022
RBM15B	G3BP2	69550	ES	2.69802e-42	0.611573
RBM15B	CCDC66	65341	AT	3.67084e-42	0.610781
RBM15B	CELF1	15763	AA	2.01578e-30	0.53112
RBM15B	IP6K2	64750	RI	7.04955e-28	0.510621
RBM15B	SMARCC2	22390	RI	4.84125e-43	0.61595
RBM15B	NIF3L1	56772	ES	1.3198e-31	0.540205
RBM15B	GGA3	43399	RI	3.28833e-27	0.504992
RBM15B	ZNF207	40205	ES	3.08244e-33	0.552288
RBM15B	BRD1	62751	AA	5.2177e-35	0.564873
RBM15B	DCTN2	22644	ES	1.0829e-28	0.51733
RBM15B	RPP14	65434	AD	5.30481e-56	0.682457
RBM15B	NISCH	65221	AT	1.51692e-40	0.601033
RBM15B	BPTF	43116	AD	3.62488e-42	0.610814
RBM15B	PSMD6	65521	ES	1.11241e-29	0.525284
RBM15B	PHF12	40023	AT	1.85521e-33	0.553884
RBM15B	SNX1	31090	AT	2.16423e-27	0.506531
RBM15B	SPIDR	97934	AD	5.87268e-34	0.557468
RBM15B	TMPO	23849	ES	9.23441e-31	0.53375
RBM15B	ING3	81586	AT	5.77414e-37	0.578169
RBM15B	NSUN4	2794	ES	1.42107e-33	0.554719
RBM15B	HIRA	61047	AP	3.86956e-35	0.565774
RBM15B	NAF1	71008	AT	2.68771e-29	0.522226
RBM15B	MORF4L2	89764	AP	1.32537e-27	0.508326
RBM15B	ZBTB1	27892	AT	8.11248e-28	0.510112
RBM15B	TAF5L	10228	AT	1.36994e-34	0.561942
RBM15B	PACRGL	68877	AT	9.37653e-31	0.533698
RBM15B	TMED4	79538	AT	1.56763e-34	0.561531
RBM15B	DHDDS	1273	AT	2.42966e-27	0.506106
RBM15B	CTNNB1	64250	RI	3.9421e-36	0.572572
RBM15B	CNOT4	81885	AT	3.81643e-29	0.521001
RBM15B	IP6K2	64742	AT	7.04955e-28	0.510621
RBM15B	WIPI2	78656	ES	1.03736e-29	0.525525
RBM15B	HP1BP3	937	AP	1.08099e-42	0.613912
RBM15B	PCBP2	22052	ES	3.03843e-28	0.513653
RBM15B	TAX1BP1	79060	AD	1.56828e-28	0.516015
RBM15B	CCDC51	64654	AD	1.13193e-32	0.54816
RBM15B	BLOC1S6	30431	AT	4.17299e-28	0.512513
RBM15B	PIP5K1A	7580	ES	1.58497e-28	0.515977
RBM15B	GLT8D1	65251	ES	1.90155e-33	0.553807
RBM15B	PPM1B	53414	AT	1.42599e-33	0.554708
RBM15B	IP6K2	64744	RI	7.04955e-28	0.510621
RBM15B	PCNP	65960	ES	2.1941e-27	0.506481
RBM15B	KDM2A	17152	AP	4.58137e-29	0.520361
RBM15B	PMPCB	81177	RI	4.53578e-29	0.520396
RBM15B	PUM2	52774	ES	4.23266e-32	0.543914
RBM15B	MCM9	77355	AT	1.64598e-29	0.52393
RBM15B	TAOK2	35998	AT	3.369e-27	0.504902
RBM15B	SMAD2	45450	AT	1.54885e-33	0.554449
RBM15B	HNRNPM	47236	RI	2.56765e-33	0.552864
RBM15B	C1orf43	7800	ES	2.43112e-31	0.538193
RBM15B	2022-09-15	3687	ES	2.01743e-30	0.531117
RBM15B	MEX3D	46522	RI	1.50559e-30	0.532106
RBM15B	BRPF1	63157	AD	4.95493e-38	0.585171
RBM15B	USP4	64850	AT	2.95675e-27	0.505383
RBM15B	RHOA	64857	ES	5.0727e-44	0.621594
RBM15B	PEX10	266	AA	1.31319e-28	0.516646
RBM15B	EPC1	11156	AP	5.16988e-30	0.527916
RBM15B	ELP6	64531	ES	1.53646e-30	0.532037
RBM15B	ASH1L	8088	ES	2.75983e-27	0.505637
RBM15B	TRA2B	68039	ES	2.51031e-29	0.522463
RBM15B	ZNF384	19923	ES	6.61542e-42	0.609261
RBM15B	COX11	42569	RI	7.72977e-27	0.501822
RBM15B	TTC31	54096	RI	4.75714e-27	0.503626
RBM15B	TATDN2	63313	AD	4.72775e-37	0.578746
RBM15B	DNAJC16	765	AT	1.29946e-31	0.540256
RBM15B	TRNT1	62977	AT	2.93885e-33	0.552438
RBM15B	PDHB	65453	AD	1.05899e-40	0.601989
RBM15B	ISG20L2	8306	RI	1.1069e-32	0.548231
RBM15B	WDR6	64794	RI	4.41849e-30	0.528453
RBM15B	GTF2I	80087	ES	7.87443e-38	0.583863
RBM15B	ZXDC	66597	AT	3.49661e-29	0.521307
RBM15B	ELP6	64524	AP	1.53646e-30	0.532037
RBM15B	ACADM	3483	AT	8.32389e-28	0.510018
RBM15B	CEP57	18390	AT	8.27058e-30	0.526305
RBM15B	SUPT7L	53041	RI	7.63642e-27	0.501867
RBM15B	NIF3L1	56774	AA	1.3198e-31	0.540205
RBM15B	PEX10	269	ES	1.31319e-28	0.516646
RBM15B	POLDIP3	62521	AT	4.92721e-28	0.511915
RBM15B	PHF12	40025	RI	1.85521e-33	0.553884
RBM15B	NIF3L1	56777	AD	1.3198e-31	0.540205
RBM15B	UBP1	63866	ES	6.23125e-47	0.637711
RBM15B	C11orf57	18723	RI	9.01108e-36	0.57013
RBM15B	ADCY6	21464	AP	3.01413e-32	0.545013
RBM15B	ERCC4	34064	AT	9.95391e-28	0.509369
RBM15B	CREBZF	18136	RI	3.91954e-31	0.53661
RBM15B	BPNT1	9867	AD	1.44088e-32	0.547387
RBM15B	STAMBP	53990	RI	1.10463e-26	0.500488
RBM15B	PANK1	12493	AP	2.05743e-29	0.523155
RBM15B	NUP62	51127	RI	6.1001e-35	0.5644
RBM15B	RNF220	2558	AT	2.43659e-35	0.567163
RBM15B	CASP2	82099	AT	1.66876e-38	0.588221
RBM15B	MPP5	28044	AT	1.69298e-27	0.507431
RBM15B	PHF12	40026	RI	1.85521e-33	0.553884
RBM15B	MBD1	45501	AT	4.27115e-31	0.536325
RBM15B	CUL2	11218	AP	2.34086e-29	0.522707
RBM15B	USP33	3533	AA	1.94312e-29	0.523354
RBM15B	LYRM2	77013	AD	2.94032e-30	0.52984
RBM15B	GDAP2	4377	AT	3.52016e-27	0.50474
RBM15B	PACRGL	68924	AD	9.37653e-31	0.533698
RBM15B	MED1	40644	AT	1.17511e-41	0.607769
RBM15B	PRKDC	83791	ES	3.01237e-29	0.521828
RBM15B	CGGBP1	65668	AA	2.50526e-43	0.61761
RBM15B	ELF2	70614	AA	1.08184e-35	0.569587
RBM15B	PSME3	41149	ES	2.7083e-35	0.566846
RBM15B	ELF2	70610	AP	1.08184e-35	0.569587
RBM15B	WDR33	55244	AT	4.95883e-27	0.503472
RBM15B	RBM48	80441	RI	3.06994e-44	0.622835
RBM15B	AGBL5	52926	ES	5.47015e-34	0.557688
RBM15B	SAFB	46853	AA	8.62559e-37	0.577009
RBM15B	HNRNPUL1	50035	AA	7.83996e-35	0.56364
RBM15B	ADNP	59788	AP	1.72908e-45	0.629838
RBM15B	NADK	229	ES	3.07276e-30	0.52969
RBM15B	SF1	16681	AA	7.66143e-38	0.583941
RBM15B	ARID1A	1297	ES	2.57178e-45	0.628882
RBM15B	SYNRG	40526	ES	1.06714e-37	0.583002
RBM15B	HEATR5B	100123	ES	9.89838e-29	0.517648
RBM15B	USP39	54316	RI	3.1466e-27	0.505154
RBM15B	YIPF3	76285	RI	1.20632e-27	0.508669
RBM15B	KDM2B	24879	RI	7.30414e-35	0.563855
RBM15B	HNRNPM	94942	ES	2.56765e-33	0.552864
RBM15B	VGLL4	63395	AP	3.39191e-39	0.592628
RBM15B	ZNF669	10511	ES	4.51114e-39	0.591844
RBM15B	YIPF3	76292	AA	1.20632e-27	0.508669
RBM15B	NUP62	51123	RI	6.1001e-35	0.5644
RBM15B	POM121C	80119	AP	1.65876e-32	0.546936
RBM15B	RNF220	2559	AD	2.43659e-35	0.567163
RBM15B	INTS12	70247	AP	6.34909e-31	0.535004
RBM15B	ATXN7L3	41826	AA	3.53914e-40	0.598766
RBM15B	ZNF587	52349	AP	6.0471e-30	0.52738
RBM15B	CCDC51	64650	AA	1.13193e-32	0.54816
RBM15B	STT3A	19306	ES	1.06969e-26	0.500608
RBM15B	ARID1A	1296	AA	2.57178e-45	0.628882
RBM15B	SMARCC2	22393	ES	4.84125e-43	0.61595
RBM15B	BCLAF1	77906	ES	2.42938e-35	0.567172
RBM15B	SLC39A6	45208	AT	6.44587e-31	0.534953
RBM15B	PMPCB	81180	ES	4.53578e-29	0.520396
RBM15B	NIPA2	29683	ES	5.56199e-29	0.51968
RBM15B	HN1L	33123	ES	3.56706e-30	0.529183
RBM15B	PRRC2B	87935	ES	7.17101e-33	0.549615
RBM15B	LRCH3	68318	AT	3.20698e-27	0.505084
RBM15B	TTC31	54077	RI	4.75714e-27	0.503626
RBM15B	FAM173B	71547	ES	1.3883e-37	0.582254
RBM15B	2022-09-15	3688	ES	2.01743e-30	0.531117
RBM15B	BOD1L1	68797	ES	3.97379e-33	0.551486
RBM15B	NPEPPS	42078	AT	7.41091e-27	0.501979
RBM15B	ZNF664	25126	ES	5.34802e-37	0.578391
RBM15B	APPL2	24126	AP	5.21472e-29	0.519907
RBM15B	BSDC1	1591	RI	2.13605e-48	0.645475
RBM15B	PPIG	55871	AT	8.70694e-28	0.509855
RBM15B	PCNT	60937	ES	7.39014e-31	0.534496
RBM15B	RNF123	64907	AD	6.81722e-29	0.518964
RBM15B	CPSF6	23304	ES	1.46672e-33	0.55462
RBM15B	ARHGEF11	8338	ES	6.99096e-34	0.556928
RBM15B	CPSF7	16198	AD	1.82977e-38	0.587964
RBM15B	TADA2A	40518	AT	5.09837e-30	0.527964
RBM15B	POM121	79925	AP	1.53387e-38	0.588456
RBM15B	PMS2	78701	ES	2.2721e-28	0.514693
RBM15B	ZNF589	64571	AT	1.47624e-30	0.532172
RBM15B	PGS1	43872	AD	2.53821e-29	0.522425
RBM15B	ZDHHC3	64392	ES	1.83634e-37	0.581457
RBM15B	OSBPL9	2975	AD	5.04273e-30	0.528001
RBM15B	OSBPL9	2974	ES	5.04273e-30	0.528001
RBM15B	SPRTN	10277	RI	1.57094e-29	0.524091
RBM15B	EIF4ENIF1	61857	AA	1.2085e-27	0.508662
RBM15B	ZNF687	7588	ES	2.04816e-34	0.560713
RBM15B	NPEPPS	42075	AP	7.41091e-27	0.501979
RBM15B	PMPCB	81174	AT	4.53578e-29	0.520396
RBM15B	MEAF6	1804	ES	6.21092e-33	0.550072
RBM15B	TP53BP2	9930	ES	4.3571e-41	0.604338
RBM15B	WDR6	64803	AA	4.41849e-30	0.528453
RBM15B	RNF34	24866	AT	2.52198e-28	0.51432
RBM15B	ING4	19915	ES	7.06911e-31	0.534645
RBM15B	AZI2	63795	AA	9.26111e-27	0.501147
RBM15B	BRD4	48069	AT	3.32443e-29	0.521484
RBM15B	RNF111	30928	AA	5.44693e-29	0.519754
RBM15B	USP39	54317	ES	3.1466e-27	0.505154
RBM15B	PEX26	61023	ES	4.18201e-37	0.579099
RBM15B	DDX46	73426	ES	3.89709e-32	0.544182
RBM15B	MSH2	53497	AT	5.37083e-33	0.550533
RBM15B	CDC42	1006	ES	4.14924e-27	0.504132
RBM15B	RPRD2	7471	RI	1.66177e-35	0.568308
RBM15B	WAC	11105	ES	8.86666e-33	0.548939
RBM15B	STAG1	66931	AT	3.06588e-29	0.521766
RBM15B	NBR1	41694	AT	1.2425e-31	0.540403
RBM15B	RQCD1	57493	AT	2.71794e-30	0.530107
RBM15B	SRSF3	75983	AT	7.30681e-36	0.570751
RBM15B	YLPM1	28429	ES	6.80022e-30	0.526977
RBM15B	AP3S2	32455	ES	2.80522e-35	0.566741
RBM15B	SRRM1	1128	ES	5.24362e-34	0.557819
KIAA1429	RAD54B	84553	AT	1.19041e-27	0.508717
KIAA1429	COMMD5	85672	AP	8.31197e-30	0.526288
KIAA1429	NDUFAF6	84598	ES	3.14349e-54	0.6743
KIAA1429	NDUFAF6	84597	ES	3.14349e-54	0.6743
KIAA1429	NDUFAF6	84590	AP	3.14349e-54	0.6743
KIAA1429	ZNF707	85482	AA	5.36675e-27	0.503179
KIAA1429	C8orf59	84333	ES	2.29738e-49	0.650486
KIAA1429	COMMD5	85673	AD	8.31197e-30	0.526288
KIAA1429	ENY2	84894	AD	2.85213e-34	0.559697
KIAA1429	NDUFAF6	84593	AT	3.14349e-54	0.6743
KIAA1429	UQCRB	84609	RI	7.07658e-27	0.502151
ZC3H13	ATP2A2	24418	RI	3.48366e-48	0.644363
ZC3H13	ZNF318	76265	AT	3.18881e-38	0.58641
ZC3H13	SMARCC2	22391	AD	4.86571e-65	0.720271
ZC3H13	CSDE1	4336	ES	1.00316e-49	0.652324
ZC3H13	MTMR3	61690	ES	3.26844e-27	0.505014
ZC3H13	PCBP2	213888	ES	1.66719e-34	0.561343
ZC3H13	CDYL	75229	AP	1.78887e-30	0.531524
ZC3H13	LRRFIP1	58133	ES	3.77038e-36	0.572703
ZC3H13	DPF2	16815	ES	8.02559e-28	0.510151
ZC3H13	SPAG9	42494	ES	1.28472e-46	0.636016
ZC3H13	AZI2	63794	AT	5.64739e-40	0.597507
ZC3H13	RBM26	26100	ES	2.09259e-60	0.70163
ZC3H13	CCSER2	12409	ES	2.01281e-36	0.574543
ZC3H13	DDX23	21484	ES	1.4545e-37	0.582121
ZC3H13	PLEKHA1	13355	ES	2.46306e-33	0.552994
ZC3H13	TRMT11	77431	AT	5.23834e-33	0.550612
ZC3H13	WDPCP	53729	AT	3.41093e-29	0.521394
ZC3H13	DNAJC14	22260	AP	5.76014e-57	0.686785
ZC3H13	LDB1	12935	AP	7.17297e-27	0.5021
ZC3H13	C2CD5	20733	ES	6.28784e-42	0.609392
ZC3H13	PCNP	65963	AA	9.85202e-59	0.694523
ZC3H13	SCP2	3045	ES	3.20101e-33	0.552169
ZC3H13	KANSL3	54541	AT	8.46205e-31	0.534042
ZC3H13	NUMB	28288	ES	1.30928e-47	0.64133
ZC3H13	CALCOCO1	22108	RI	3.4065e-38	0.586225
ZC3H13	NFYA	76094	ES	1.14945e-32	0.548111
ZC3H13	BSDC1	1590	AT	1.22412e-36	0.575993
ZC3H13	UVRAG	17878	AP	1.06651e-36	0.576393
ZC3H13	ASAP2	52611	ES	2.2528e-38	0.587383
ZC3H13	MPHOSPH8	25400	AT	1.98886e-52	0.665734
ZC3H13	TCF20	62501	ES	2.69334e-34	0.559873
ZC3H13	CTNND1	15999	ES	1.22889e-30	0.53279
ZC3H13	MBD1	45518	ES	2.37419e-31	0.538271
ZC3H13	ALS2	56917	AT	2.37934e-41	0.605927
ZC3H13	SYNCRIP	76934	AT	3.12337e-47	0.639319
ZC3H13	USP33	3534	ES	1.34013e-36	0.575729
ZC3H13	OSBPL9	2960	AP	2.50629e-35	0.567079
ZC3H13	CSNK1G3	73145	ES	1.49134e-38	0.588534
ZC3H13	LIMS1	54889	AT	2.33988e-32	0.54583
ZC3H13	BRD3	88089	AT	1.16563e-34	0.562435
ZC3H13	MLLT10	10970	AT	2.81921e-37	0.580231
ZC3H13	TANK	55730	AP	1.98397e-36	0.574585
ZC3H13	NFATC3	37186	ES	1.87493e-49	0.650938
ZC3H13	APP	60283	ES	7.54091e-28	0.510376
ZC3H13	POM121	79927	AT	9.39845e-55	0.67674
ZC3H13	TCF7L2	13122	AT	5.35585e-33	0.550542
ZC3H13	SLAIN2	69214	ES	2.57914e-56	0.683871
ZC3H13	SMAP1	76647	ES	3.29681e-38	0.586317
ZC3H13	DDHD2	83376	AP	9.99204e-30	0.525654
ZC3H13	CARF	56967	AT	2.73844e-46	0.634232
ZC3H13	ITSN1	60468	AT	2.11747e-34	0.560611
ZC3H13	UBE2D3	70130	ES	2.11012e-35	0.567594
ZC3H13	G3BP2	69550	ES	3.55727e-59	0.696423
ZC3H13	CCDC66	65341	AT	1.90921e-34	0.560928
ZC3H13	SSR1	75259	AA	6.99729e-31	0.534679
ZC3H13	CELF1	15763	AA	2.90449e-51	0.660041
ZC3H13	SMARCC2	22390	RI	4.86571e-65	0.720271
ZC3H13	ZC3H7A	34033	AP	2.45252e-31	0.538164
ZC3H13	SLK	13030	ES	7.54918e-36	0.570654
ZC3H13	ZNF207	40205	ES	7.12312e-43	0.614972
ZC3H13	GALK2	30516	AP	9.63822e-28	0.509486
ZC3H13	KLHL42	20900	ES	3.23283e-43	0.616968
ZC3H13	BRD1	62751	AA	8.99597e-38	0.583486
ZC3H13	DCTN2	22644	ES	5.29467e-38	0.584984
ZC3H13	RPP14	65434	AD	3.11345e-45	0.628421
ZC3H13	MRPL19	54157	AT	5.73234e-29	0.519574
ZC3H13	THAP9	69749	ES	3.34608e-28	0.513307
ZC3H13	KCTD7	79882	ES	5.423e-31	0.53553
ZC3H13	ZNF585B	49454	AP	7.83503e-29	0.518474
ZC3H13	TBCK	70263	AP	8.85512e-34	0.556194
ZC3H13	BPTF	43116	AD	1.54133e-51	0.661398
ZC3H13	USO1	69551	ES	1.64605e-58	0.69356
ZC3H13	LPP	68087	AT	1.20393e-39	0.595457
ZC3H13	PHF12	40023	AT	3.74006e-36	0.572727
ZC3H13	EXOC1	69335	ES	8.26486e-27	0.501572
ZC3H13	COPA	8458	AA	2.10519e-30	0.530973
ZC3H13	SNX1	31090	AT	1.12772e-29	0.525237
ZC3H13	BBS1	17056	ES	2.28555e-27	0.506331
ZC3H13	PFKM	21429	ES	1.42427e-36	0.575552
ZC3H13	SUCLA2	25849	AP	3.31323e-88	0.794989
ZC3H13	SEC31A	69734	ES	3.95746e-30	0.528829
ZC3H13	LRRFIP1	58132	ES	3.77038e-36	0.572703
ZC3H13	PHLPP2	37476	AT	8.37551e-35	0.56344
ZC3H13	ING3	81586	AT	8.45204e-47	0.636998
ZC3H13	RABGEF1	79898	ES	8.42766e-36	0.570328
ZC3H13	PLEKHB2	55370	AT	2.45417e-30	0.530453
ZC3H13	FLCN	39461	AT	2.50067e-30	0.53039
ZC3H13	DYNC1I2	55939	AP	3.25753e-40	0.598988
ZC3H13	ADD3	13077	ES	5.19046e-31	0.535676
ZC3H13	NAF1	71008	AT	4.65031e-41	0.604167
ZC3H13	EIF4A2	68056	ES	1.70152e-31	0.53937
ZC3H13	CCDC122	25772	AT	1.72404e-30	0.531648
ZC3H13	DDX17	62238	AP	2.43068e-46	0.634514
ZC3H13	NFE2L1	42158	AP	5.20918e-33	0.55063
ZC3H13	MORF4L2	89764	AP	2.96164e-41	0.605353
ZC3H13	FXR1	67746	ES	3.58319e-39	0.592477
ZC3H13	ZBTB1	27892	AT	1.07334e-49	0.652175
ZC3H13	TAF5L	10228	AT	2.95705e-44	0.622927
ZC3H13	PACRGL	68877	AT	2.84453e-30	0.529952
ZC3H13	CLCN6	686	AT	7.36384e-37	0.577467
ZC3H13	KIF1B	602	AT	6.97286e-40	0.596938
ZC3H13	N4BP2L2	25597	AD	1.0393e-31	0.540988
ZC3H13	CTNNB1	64250	RI	1.59354e-42	0.612922
ZC3H13	CNOT4	81885	AT	5.34481e-44	0.621465
ZC3H13	ALDH6A1	28366	AP	4.77022e-31	0.535957
ZC3H13	USP48	994	AP	2.36237e-39	0.593619
ZC3H13	C16orf52	35532	AT	3.5358e-29	0.521268
ZC3H13	RNF14	73843	ES	1.596e-51	0.661323
ZC3H13	KDM4C	85823	AP	7.43355e-36	0.5707
ZC3H13	BTBD8	3754	AT	1.04992e-39	0.595829
ZC3H13	HP1BP3	937	AP	1.43567e-53	0.671196
ZC3H13	PCBP2	22052	ES	1.66719e-34	0.561343
ZC3H13	TERF1	84141	ES	2.75126e-49	0.650084
ZC3H13	MBNL1	67324	ES	1.00238e-36	0.576573
ZC3H13	TAX1BP1	79060	AD	2.46205e-29	0.522531
ZC3H13	KMT2C	82413	AP	6.67172e-58	0.690915
ZC3H13	ARL1	23946	AT	4.8518e-41	0.604055
ZC3H13	BLOC1S6	30431	AT	7.51896e-60	0.699293
ZC3H13	PIP5K1A	7580	ES	6.63171e-40	0.597073
ZC3H13	MAP3K7	77020	ES	5.46025e-40	0.597598
ZC3H13	PCSK7	18901	ES	2.15962e-27	0.506539
ZC3H13	CCPG1	30726	RI	6.54215e-28	0.510891
ZC3H13	EIF4A2	68055	AA	1.70152e-31	0.53937
ZC3H13	ASCC3	77092	AT	7.75764e-31	0.534334
ZC3H13	MEIS2	29906	AP	1.35743e-28	0.516528
ZC3H13	PPM1B	53414	AT	2.85983e-44	0.62301
ZC3H13	BBS1	17048	ES	2.28555e-27	0.506331
ZC3H13	PCNP	65960	ES	9.85202e-59	0.694523
ZC3H13	MEF2D	8275	ES	5.38127e-29	0.519796
ZC3H13	KDM2A	17152	AP	7.59463e-31	0.534405
ZC3H13	ZBTB43	87600	AP	7.17465e-30	0.526793
ZC3H13	PUM2	52774	ES	1.69624e-54	0.67555
ZC3H13	MCM9	77355	AT	2.72836e-46	0.634241
ZC3H13	ABI1	11048	ES	3.35424e-43	0.616876
ZC3H13	SMAD2	45450	AT	9.29918e-45	0.625764
ZC3H13	APP	60282	ES	7.54091e-28	0.510376
ZC3H13	FGFR1OP2	20854	AT	6.40964e-30	0.52718
ZC3H13	FAM98B	29919	AT	2.83082e-42	0.61145
ZC3H13	2022-09-15	3687	ES	4.20771e-34	0.558499
ZC3H13	WTAP	78310	AP	3.65122e-30	0.529103
ZC3H13	SRPK2	81282	AT	2.46081e-51	0.660397
ZC3H13	CNBP	66704	AA	3.38991e-30	0.529356
ZC3H13	FAM175A	69800	AT	7.74801e-42	0.608851
ZC3H13	2022-03-08	11362	ES	2.28591e-34	0.560376
ZC3H13	CD164	77187	ES	8.52641e-34	0.556311
ZC3H13	VWA8	25742	AT	3.17271e-47	0.639283
ZC3H13	EPC1	11156	AP	1.44828e-41	0.607225
ZC3H13	POC1B	23625	AT	1.10355e-40	0.601879
ZC3H13	THAP6	69530	AT	6.36666e-43	0.615256
ZC3H13	ASH1L	8088	ES	4.88115e-66	0.724099
ZC3H13	SMG7	9179	AD	8.40127e-27	0.501511
ZC3H13	SEC23A	27345	AP	2.07569e-40	0.600196
ZC3H13	RPS6KA5	28834	ES	1.81429e-39	0.59434
ZC3H13	RCOR3	9708	AT	2.09753e-27	0.506646
ZC3H13	STX7	77642	AT	1.19524e-56	0.68537
ZC3H13	TRA2B	68039	ES	1.8381e-32	0.546606
ZC3H13	CA5B	98313	ES	6.96534e-41	0.6031
ZC3H13	ZNF384	19923	ES	4.72109e-67	0.727923
ZC3H13	USP54	12165	ES	4.48258e-33	0.551105
ZC3H13	COX11	42569	RI	1.1056e-31	0.540785
ZC3H13	SEC31A	69718	AP	3.95746e-30	0.528829
ZC3H13	DNAJC16	765	AT	6.09841e-35	0.564401
ZC3H13	GPATCH2L	28542	AT	1.4436e-55	0.680481
ZC3H13	BBS1	17050	ES	2.28555e-27	0.506331
ZC3H13	FBXO3	14929	RI	9.55962e-55	0.676706
ZC3H13	RBFOX2	61985	ES	2.07219e-41	0.606289
ZC3H13	RIF1	55572	ES	1.51885e-46	0.635623
ZC3H13	ZFAND1	84309	ES	5.24023e-31	0.535644
ZC3H13	TUBGCP3	26303	AT	9.17336e-33	0.548831
ZC3H13	FMR1	90274	ES	6.44855e-28	0.510943
ZC3H13	TECPR2	29415	AT	4.94639e-39	0.591591
ZC3H13	STAT3	41034	AA	1.19715e-34	0.562353
ZC3H13	HECTD2	12516	AT	2.63343e-41	0.605662
ZC3H13	RNF14	73849	ES	1.596e-51	0.661323
ZC3H13	ISG20L2	8306	RI	6.53233e-32	0.542504
ZC3H13	DOCK9	26178	ES	2.24152e-52	0.665483
ZC3H13	GTF2I	80087	ES	5.45688e-61	0.704061
ZC3H13	PFKM	21423	RI	1.42427e-36	0.575552
ZC3H13	VPS8	67977	ES	2.55939e-34	0.56003
ZC3H13	GTF2H1	14599	AP	3.10215e-33	0.552268
ZC3H13	NUMB	28287	AP	1.30928e-47	0.64133
ZC3H13	ADD3	13075	AP	5.19046e-31	0.535676
ZC3H13	GLG1	37565	RI	7.67282e-27	0.501849
ZC3H13	ACADM	3483	AT	2.78187e-38	0.586793
ZC3H13	CEP57	18390	AT	2.74391e-36	0.573636
ZC3H13	FAM21A	11559	ES	2.2267e-32	0.545989
ZC3H13	PHF12	40025	RI	3.74006e-36	0.572727
ZC3H13	UBP1	63866	ES	1.39306e-51	0.661614
ZC3H13	UEVLD	14667	AT	2.16776e-52	0.665553
ZC3H13	C11orf57	18723	RI	2.05881e-37	0.58113
ZC3H13	SEC24C	12178	ES	2.58047e-39	0.593378
ZC3H13	NPHP3	66811	AT	1.9704e-39	0.594115
ZC3H13	ERCC4	34064	AT	4.91515e-51	0.658909
ZC3H13	CREBZF	18136	RI	8.47201e-36	0.570312
ZC3H13	STAMBP	53990	RI	7.75777e-28	0.510274
ZC3H13	DIMT1	72182	AT	7.65697e-34	0.556646
ZC3H13	MPP5	28044	AT	2.10225e-40	0.600162
ZC3H13	CUL1	82147	AP	6.82784e-30	0.526963
ZC3H13	PHF12	40026	RI	3.74006e-36	0.572727
ZC3H13	MBD1	45501	AT	2.37419e-31	0.538271
ZC3H13	OXR1	84842	AP	7.06636e-30	0.526846
ZC3H13	CUL2	11218	AP	1.56585e-42	0.612967
ZC3H13	USP33	3533	AA	1.34013e-36	0.575729
ZC3H13	LYRM2	77013	AD	2.71661e-40	0.599475
ZC3H13	PACRGL	68924	AD	2.84453e-30	0.529952
ZC3H13	PPHLN1	21227	ES	9.95106e-44	0.61992
ZC3H13	CNOT7	82785	AT	8.35201e-32	0.541703
ZC3H13	RBM41	89818	ES	2.1633e-38	0.587496
ZC3H13	MED1	40644	AT	1.77056e-38	0.588056
ZC3H13	PRKDC	83791	ES	9.39644e-32	0.541318
ZC3H13	EIF5	29443	RI	2.86671e-28	0.513862
ZC3H13	CGGBP1	65668	AA	8.71342e-33	0.548995
ZC3H13	IRF2BP2	10338	AD	7.0398e-33	0.549674
ZC3H13	ELF2	70614	AA	1.9516e-50	0.655919
ZC3H13	BTBD10	14453	ES	2.51149e-41	0.605786
ZC3H13	PSME3	41149	ES	1.73071e-36	0.574984
ZC3H13	CEP135	69337	AT	5.37093e-41	0.603787
ZC3H13	ELF2	70610	AP	1.9516e-50	0.655919
ZC3H13	WDR33	55244	AT	3.54801e-31	0.536941
ZC3H13	RBM48	80441	RI	3.19165e-40	0.599043
ZC3H13	COG5	81337	AT	5.20035e-47	0.638133
ZC3H13	HNRNPUL1	50035	AA	2.04797e-27	0.506734
ZC3H13	CHM	89563	AT	8.15208e-33	0.549207
ZC3H13	NUP43	78098	RI	6.38307e-28	0.51098
ZC3H13	RREB1	75253	ES	8.37473e-43	0.614561
ZC3H13	UBE2G2	60831	ES	1.02785e-29	0.525557
ZC3H13	CKAP2	26001	AT	2.3513e-32	0.545814
ZC3H13	CARM1	47597	RI	5.89363e-30	0.527468
ZC3H13	DDX20	4189	RI	6.21084e-29	0.519292
ZC3H13	ADNP	59788	AP	1.08752e-55	0.681041
ZC3H13	SF1	16681	AA	5.58705e-48	0.643285
ZC3H13	FPGT	3452	ES	1.18835e-36	0.576079
[truncated: 4,354 more rows]
