# Supplementary material for: N6-Methyladenosine-related alternative splicing events play a role in bladder cancer
Source: publisher site journal article supplement (doi:10.1515/biol-2022-0479), 2022-01-01
Supplement: Supplementary file 5 [file biol-2022-0479_suppl_table4.xlsx]

## Sheet: correlation
gene	AS	cor	p.value
ALKBH5	AA	-0.328872	1.14e-11
ALKBH5	AD	-0.265498	5.82e-08
ALKBH5	AP	0.181773	0.000235535
ALKBH5	AT	0.398554	7.17e-17
ALKBH5	ES	-0.430014	1.17e-19
ALKBH5	RI	-0.313148	1.15e-10
FTO	AA	-0.385193	8.96e-16
FTO	AD	-0.315618	8.09e-11
FTO	AP	0.107678	0.030266
FTO	AT	0.481308	7.12e-25
FTO	ES	-0.524047	6.03e-30
FTO	RI	-0.331222	7.97e-12
HNRNPA2B1	AA	-0.301101	6.21e-10
HNRNPA2B1	AD	-0.291367	2.29e-09
HNRNPA2B1	AP	0.217485	1e-05
HNRNPA2B1	AT	0.283448	6.39e-09
HNRNPA2B1	ES	-0.584399	1.85e-38
HNRNPA2B1	RI	-0.268109	4.26e-08
HNRNPC	AA	-0.375897	4.86e-15
HNRNPC	AD	-0.351514	3.19e-13
HNRNPC	AP	0.239714	1.06e-06
HNRNPC	AT	0.361154	6.37e-14
HNRNPC	ES	-0.57977	9.62e-38
HNRNPC	RI	-0.377629	3.56e-15
IGF2BP2	AA	-0.35089	3.54e-13
IGF2BP2	AD	-0.250589	3.24e-07
IGF2BP2	AP	0.329146	1.09e-11
IGF2BP2	AT	0.297455	1.02e-09
IGF2BP2	ES	-0.342788	1.31e-12
IGF2BP2	RI	-0.443795	5.66e-21
IGF2BP3	AA	-0.252538	2.6e-07
IGF2BP3	AD	-0.142107	0.00416272
IGF2BP3	AP	0.079684	0.109332
IGF2BP3	AT	0.18156	0.000239623
IGF2BP3	ES	-0.279488	1.06e-08
IGF2BP3	RI	-0.280034	9.85e-09
KIAA1429	AA	0.0228241	0.646977
KIAA1429	AD	0.0508313	0.307511
KIAA1429	AP	0.0721487	0.147235
KIAA1429	AT	-0.00131679	0.978924
KIAA1429	ES	0.00831998	0.867432
KIAA1429	RI	-0.00750921	0.880248
METTL14	AA	-0.385998	7.72e-16
METTL14	AD	-0.321158	3.61e-11
METTL14	AP	0.0558835	0.261848
METTL14	AT	0.455028	4.31e-22
METTL14	ES	-0.581771	4.73e-38
METTL14	RI	-0.292021	2.1e-09
METTL15	AA	-0.257918	1.41e-07
METTL15	AD	-0.322873	2.8e-11
METTL15	AP	0.0788394	0.113154
METTL15	AT	0.324869	2.08e-11
METTL15	ES	-0.411055	6.07e-18
METTL15	RI	-0.24013	1.01e-06
METTL3	AA	0.168867	0.000643889
METTL3	AD	0.162542	0.00102766
METTL3	AP	-0.128603	0.00957373
METTL3	AT	-0.110065	0.0267666
METTL3	ES	-0.104805	0.0349919
METTL3	RI	0.343787	1.12e-12
RBM15	AA	-0.268286	4.17e-08
RBM15	AD	-0.232646	2.22e-06
RBM15	AP	0.111578	0.0247339
RBM15	AT	0.145022	0.00344488
RBM15	ES	-0.448854	1.8e-21
RBM15	RI	-0.244918	6.04e-07
RBM15B	AA	-0.238047	1.26e-06
RBM15B	AD	-0.186258	0.000163368
RBM15B	AP	0.038195	0.443342
RBM15B	AT	0.24294	7.49e-07
RBM15B	ES	-0.326411	1.65e-11
RBM15B	RI	-0.130087	0.00876691
RBMX	AA	-0.256433	1.67e-07
RBMX	AD	-0.270353	3.25e-08
RBMX	AP	0.172434	0.00049108
RBMX	AT	0.3055	3.39e-10
RBMX	ES	-0.528659	1.54e-30
RBMX	RI	-0.197683	6.19e-05
WTAP	AA	-0.27775	1.31e-08
WTAP	AD	-0.322169	3.11e-11
WTAP	AP	0.198231	5.9e-05
WTAP	AT	0.404544	2.22e-17
WTAP	ES	-0.502642	2.57e-27
WTAP	RI	-0.30242	5.19e-10
YTHDC1	AA	-0.14267	0.00401442
YTHDC1	AD	-0.110115	0.026697
YTHDC1	AP	-0.0756662	0.128454
YTHDC1	AT	0.220007	7.87e-06
YTHDC1	ES	-0.38936	4.13e-16
YTHDC1	RI	0.0313208	0.52966
YTHDC2	AA	-0.0775263	0.119302
YTHDC2	AD	-0.139042	0.00506081
YTHDC2	AP	-0.040949	0.411145
YTHDC2	AT	0.211417	1.79e-05
YTHDC2	ES	-0.352856	2.56e-13
YTHDC2	RI	0.063506	0.202178
YTHDF1	AA	-0.219888	7.96e-06
YTHDF1	AD	-0.160341	0.00120452
YTHDF1	AP	0.0926899	0.0623784
YTHDF1	AT	0.146926	0.00303883
YTHDF1	ES	-0.342488	1.37e-12
YTHDF1	RI	-0.136672	0.00587072
YTHDF2	AA	-0.260178	1.09e-07
YTHDF2	AD	-0.271777	2.74e-08
YTHDF2	AP	0.0445217	0.371506
YTHDF2	AT	0.248177	4.23e-07
YTHDF2	ES	-0.467914	2e-23
YTHDF2	RI	-0.167484	0.000714216
YTHDF3	AA	-0.286378	4.39e-09
YTHDF3	AD	-0.196967	6.59e-05
YTHDF3	AP	0.0493444	0.321896
YTHDF3	AT	0.382686	1.42e-15
YTHDF3	ES	-0.475664	2.95e-24
YTHDF3	RI	-0.143502	0.00380392
ZC3H13	AA	-0.245738	5.53e-07
ZC3H13	AD	-0.204711	3.31e-05
ZC3H13	AP	0.0662627	0.183237
ZC3H13	AT	0.345943	7.9e-13
ZC3H13	ES	-0.449425	1.58e-21
ZC3H13	RI	-0.154927	0.0017653
